# Supplementary material for: Targeting the gut microbiota with inulin-type fructans: preclinical demonstration of a novel approach in the management of endothelial dysfunction
Source: PubMed Central journal article supplement — Gut. 2017 Apr 4;67(2):271–83. doi: 10.1136/gutjnl-2016-313316 (PMC5868295; doi:10.1136/gutjnl-2016-313316), 2017-04-04

**Figure S1. Related to Figure 3: *Slc10a2*, *Slc5a8*, *SAA1*, *SAA3*, *Gcg*, *Enpep*, *OSTa*, *Nts* and *Lyz1* mRNA levels in the caecal tissue.**

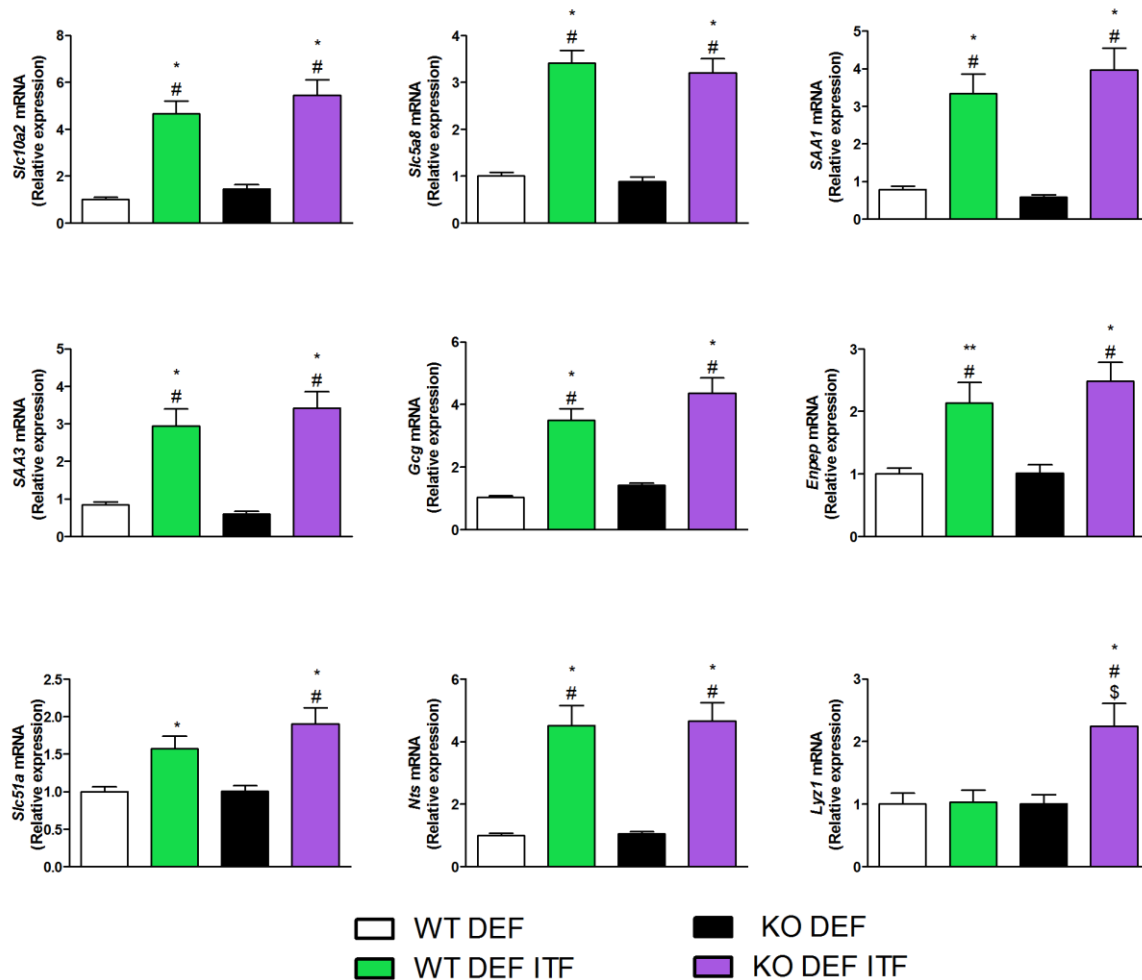

qPCR results in the caecal tissue of n-3 PUFA depleted wild-type mice (WT DEF), of n-3 PUFA depleted wild-type mice supplemented in ITF for the last fifteen days (WT DEF ITF), of n-3 PUFA depleted *Apoe*<sup>-/-</sup> mice (KO DEF) and of n-3 PUFA depleted *Apoe*<sup>-/-</sup> mice supplemented in ITF for the last fifteen days (KO DEF ITF). Data (N=11-15) are expressed as mean ± SEM. Data were analysed by one-way ANOVA followed by Tukey's post-tests: \* vs WT DEF, \$ vs WT DEF ITF, # vs KO DEF.

Figure S2. Related to Figure 5: LDA scores in green for the taxa enriched in prebiotics treated mice and in red for the taxa enriched in untreated mice, generated using LEfSe.

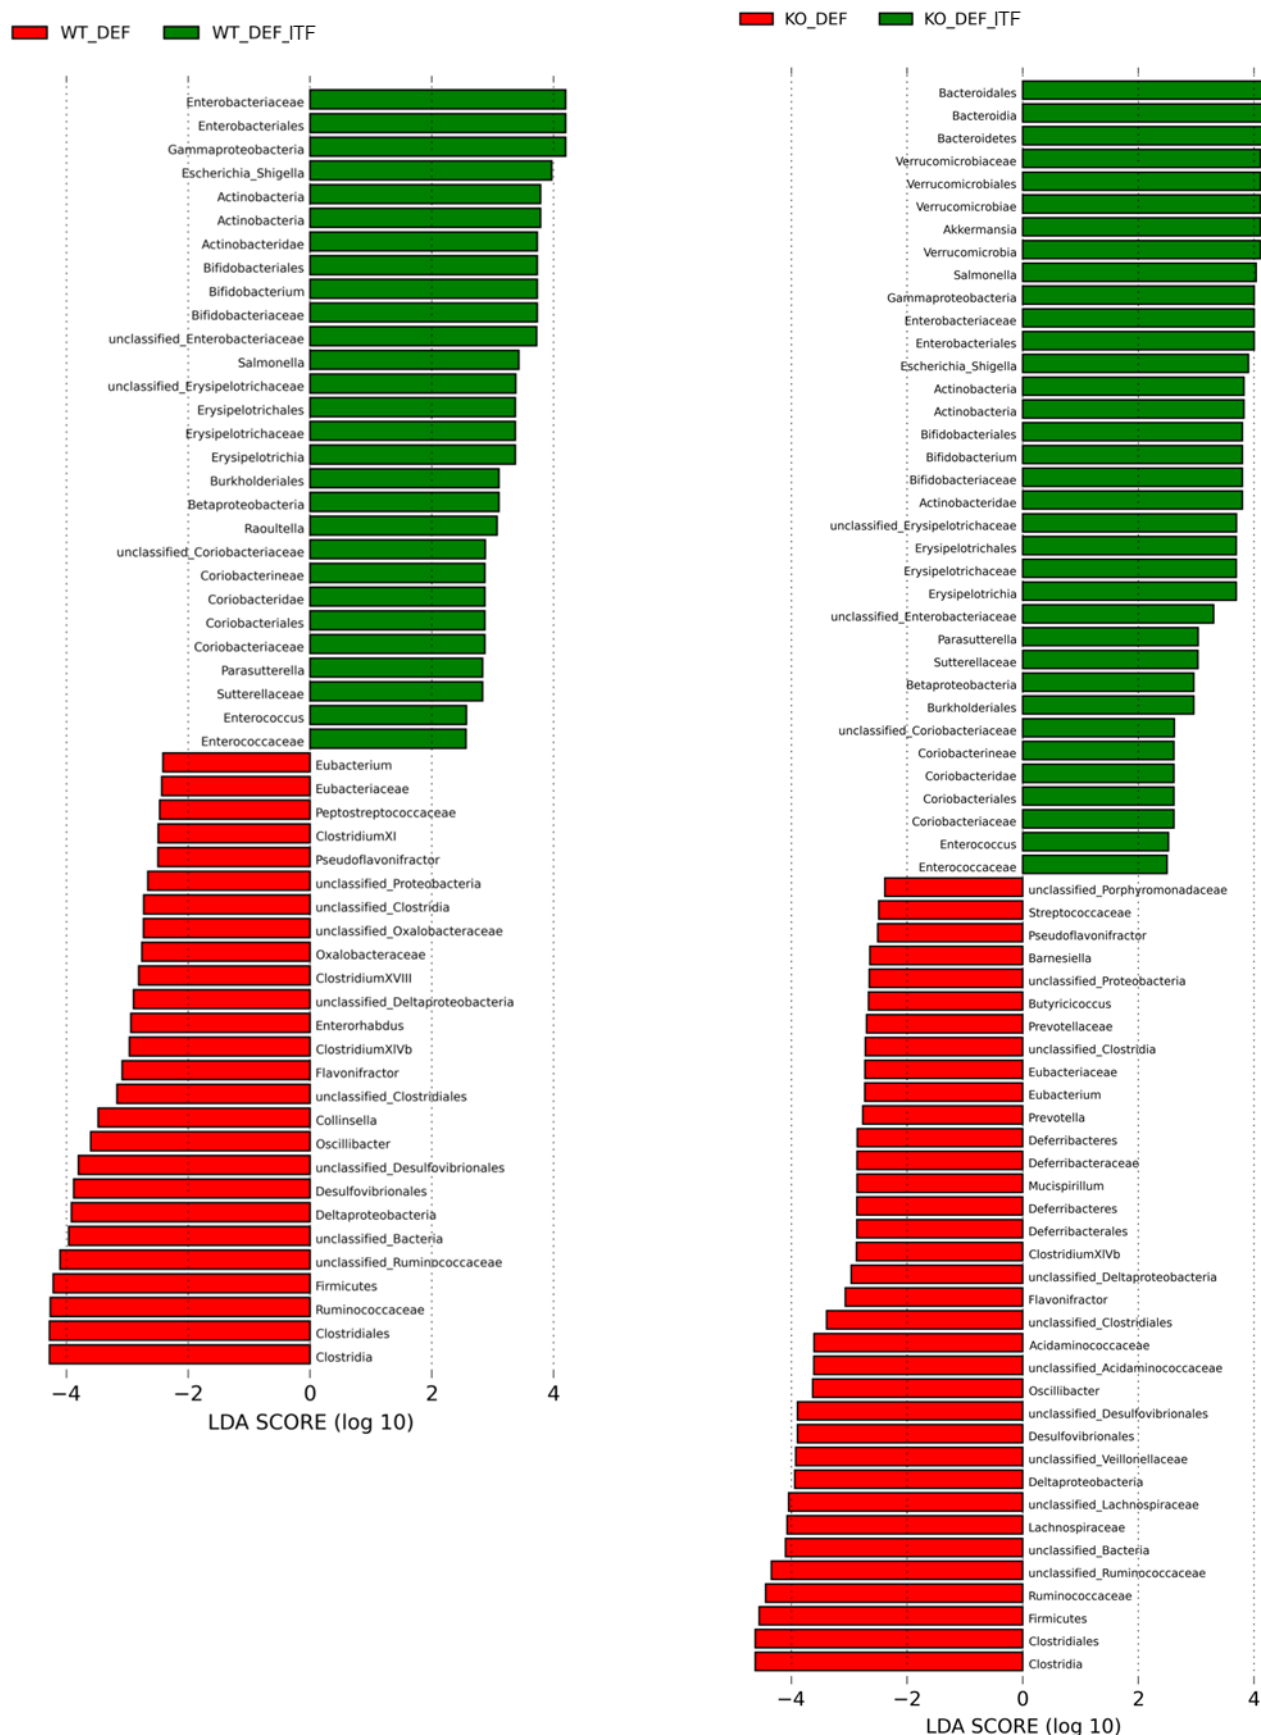

**Figure S3. Related to Figure 7: Heatmap representation of the Spearman r correlation coefficient between systemic or portal bile acid profiles and bacterial taxa. Only the bacteria for which at least one significant correlation to bile acid levels was found, are displayed.**

(c, class; o, order; f, family; g, genus; s, species). \*Adjusted pvalue<0.05.

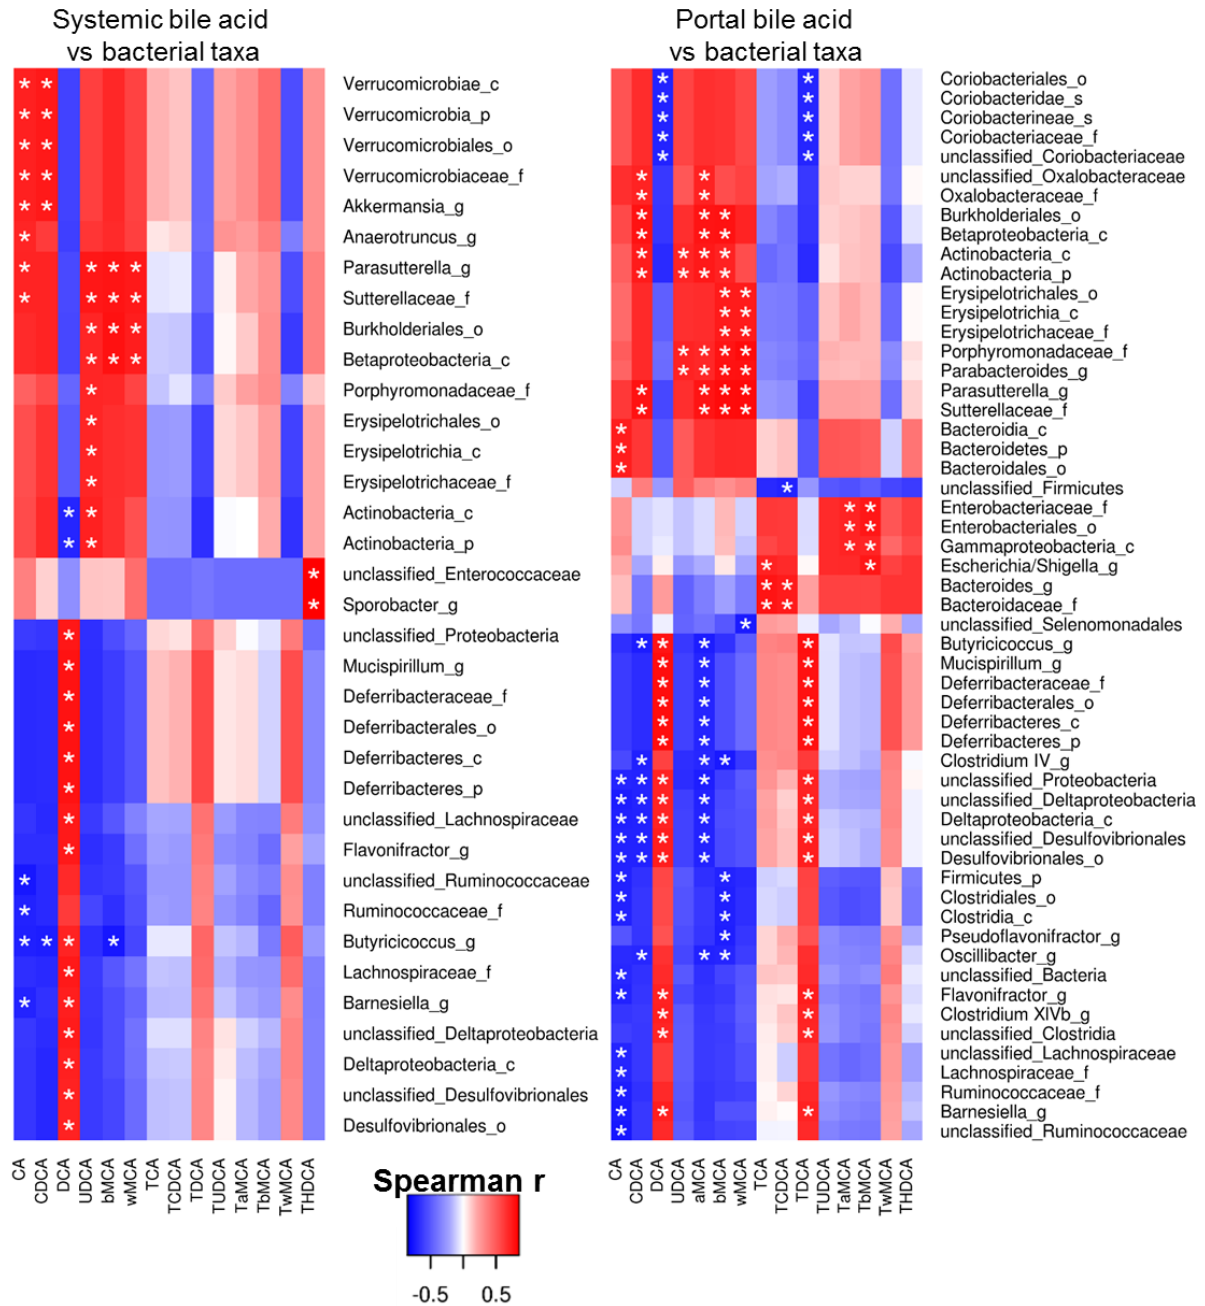

Supplement: gutjnl-2016-313316supp002.pdf [file gutjnl-2016-313316supp002.pdf]
