# Supplementary material for: Targeting the gut microbiota with inulin-type fructans: preclinical demonstration of a novel approach in the management of endothelial dysfunction
Source: PubMed Central journal article supplement — Gut. 2017 Apr 4;67(2):271–83. doi: 10.1136/gutjnl-2016-313316 (PMC5868295; doi:10.1136/gutjnl-2016-313316), 2017-04-04
Supplement: gutjnl-2016-313316supp003.pdf [file gutjnl-2016-313316supp003.pdf]

| OTU table | Relative abundance (%)               | Mean    |            |         |            | SEM    |            |        |            | One-way ANOVA          |                        | Tukey post-tests (p-value) |                        |
|-----------|--------------------------------------|---------|------------|---------|------------|--------|------------|--------|------------|------------------------|------------------------|----------------------------|------------------------|
|           |                                      | KO DEF  | KO DEF ITF | WT DEF  | WT DEF ITF | KO DEF | KO DEF ITF | WT DEF | WT DEF ITF | p-value                | q-value                | KO DEF vs KO DEF ITF       | WT DEF vs WT DEF ITF   |
| OTU_10    | Pseudoflavonifractor sp. (1)         | 7,5850  | 0,4526     | 4,2756  | 0,4754     | 0,8266 | 0,1813     | 0,6817 | 0,1280     | <b><u>4,19E-15</u></b> | <b><u>1,72E-12</u></b> | <b><u>1,92E-12</u></b>     | <b><u>8,72E-06</u></b> |
| OTU_21    | Clostridium XIVb sp. (1)             | 2,7489  | 0,1817     | 0,8081  | 0,1581     | 0,4269 | 0,1118     | 0,1135 | 0,0567     | <b><u>5,78E-13</u></b> | <b><u>7,91E-11</u></b> | <b><u>1,46E-11</u></b>     | 1,10E-01               |
| OTU_61    | unclassified_Lachnospiraceae (1)     | 0,7939  | 0,0092     | 0,0219  | 0,0002     | 0,1476 | 0,0076     | 0,0140 | 0,0002     | <b><u>3,16E-13</u></b> | <b><u>5,19E-11</u></b> | <b><u>3,72E-11</u></b>     | 9,95E-01               |
| OTU_129   | unclassified_Lachnospiraceae (1)     | 0,1241  | 0,0019     | 0,0589  | 0,0026     | 0,0209 | 0,0011     | 0,0087 | 0,0013     | <b><u>1,93E-12</u></b> | <b><u>2,27E-10</u></b> | <b><u>5,54E-11</u></b>     | <b><u>9,13E-04</u></b> |
| OTU_884   | unclassified_Ruminococcaceae (0.922) | 1,6238  | 0,0958     | 0,2769  | 0,1077     | 0,2603 | 0,0363     | 0,1005 | 0,0643     | <b><u>4,74E-12</u></b> | <b><u>4,86E-10</u></b> | <b><u>1,24E-10</u></b>     | 7,84E-01               |
| OTU_104   | unclassified_Ruminococcaceae (1)     | 0,1216  | 0,0057     | 0,1532  | 0,0100     | 0,0188 | 0,0027     | 0,0110 | 0,0041     | <b><u>6,70E-18</u></b> | <b><u>5,50E-15</u></b> | <b><u>4,70E-10</u></b>     | <b><u>1,54E-12</u></b> |
| OTU_843   | unclassified_Ruminococcaceae (0.901) | 1,3444  | 0,0758     | 0,1752  | 0,0267     | 0,2352 | 0,0288     | 0,0940 | 0,0221     | <b><u>1,45E-11</u></b> | <b><u>1,32E-09</u></b> | <b><u>8,11E-10</u></b>     | 7,85E-01               |
| OTU_910   | Flavonifractor sp. (0.971)           | 0,1405  | 0,0128     | 0,0028  | 0,0026     | 0,0322 | 0,0059     | 0,0010 | 0,0015     | <b><u>2,35E-09</u></b> | <b><u>1,38E-07</u></b> | <b><u>3,15E-07</u></b>     | 1,00E+00               |
| OTU_25    | unclassified_Firmicutes (0.992)      | 2,6790  | 0,4419     | 0,7054  | 0,2844     | 0,3941 | 0,1469     | 0,3362 | 0,1554     | <b><u>9,33E-08</u></b> | <b><u>4,51E-06</u></b> | <b><u>1,69E-06</u></b>     | 6,72E-01               |
| OTU_65    | unclassified_Lachnospiraceae (1)     | 0,3021  | 0,0024     | 0,3093  | 0,0126     | 0,0717 | 0,0012     | 0,0406 | 0,0036     | <b><u>1,32E-09</u></b> | <b><u>8,82E-08</u></b> | <b><u>4,31E-06</u></b>     | <b><u>1,92E-06</u></b> |
| OTU_56    | Anaerotruncus sp. (0.909)            | 0,8219  | 0,0408     | 0,0974  | 0,0053     | 0,2225 | 0,0113     | 0,0384 | 0,0046     | <b><u>3,37E-07</u></b> | <b><u>1,32E-05</u></b> | <b><u>4,75E-06</u></b>     | 9,06E-01               |
| OTU_283   | unclassified_Lachnospiraceae (1)     | 0,0349  | 0,0010     | 0,0019  | 0,0019     | 0,0100 | 0,0008     | 0,0006 | 0,0011     | <b><u>1,02E-06</u></b> | <b><u>3,66E-05</u></b> | <b><u>9,17E-06</u></b>     | 1,00E+00               |
| OTU_57    | unclassified_Lachnospiraceae (1)     | 1,2606  | 0,1047     | 0,0000  | 0,0000     | 0,3493 | 0,0495     | 0,0000 | 0,0000     | <b><u>2,26E-07</u></b> | <b><u>9,79E-06</u></b> | <b><u>1,31E-05</u></b>     | 1,00E+00               |
| OTU_273   | Clostridium XIVa sp. (1)             | 0,0295  | 0,0011     | 0,0009  | 0,0000     | 0,0086 | 0,0009     | 0,0007 | 0,0000     | <b><u>7,36E-07</u></b> | <b><u>2,75E-05</u></b> | <b><u>1,35E-05</u></b>     | 9,98E-01               |
| OTU_3     | unclassified_Desulfovibrionaceae (1) | 10,1178 | 2,1349     | 9,8916  | 3,6010     | 1,9889 | 0,4932     | 1,1062 | 0,3947     | <b><u>2,27E-07</u></b> | <b><u>9,79E-06</u></b> | <b><u>2,21E-05</u></b>     | <b><u>5,12E-04</u></b> |
| OTU_114   | unclassified_Lachnospiraceae (1)     | 0,1211  | 0,0087     | 0,1030  | 0,0306     | 0,0199 | 0,0074     | 0,0139 | 0,0188     | <b><u>1,81E-06</u></b> | <b><u>5,93E-05</u></b> | <b><u>2,50E-05</u></b>     | <b><u>6,36E-03</u></b> |
| OTU_348   | Lachnospiraceae_incertae_sedis (1)   | 0,9599  | 0,0716     | 1,6091  | 0,1482     | 0,1648 | 0,0400     | 0,1853 | 0,0382     | <b><u>8,10E-14</u></b> | <b><u>2,22E-11</u></b> | <b><u>3,29E-05</u></b>     | <b><u>2,14E-11</u></b> |
| OTU_550   | Akkermansia muciniphila (0.946)      | 0,0026  | 0,0177     | 0,0109  | 0,0080     | 0,0016 | 0,0024     | 0,0025 | 0,0017     | <b><u>8,40E-05</u></b> | <b><u>1,60E-03</u></b> | <b><u>4,20E-05</u></b>     | 7,58E-01               |
| OTU_40    | unclassified_Lachnospiraceae (0.975) | 1,0411  | 0,1818     | 0,5790  | 0,2730     | 0,2235 | 0,0844     | 0,0684 | 0,0978     | <b><u>3,60E-05</u></b> | <b><u>7,99E-04</u></b> | <b><u>5,58E-05</u></b>     | 2,86E-01               |
| OTU_81    | unclassified_Lachnospiraceae (0.975) | 0,3568  | 0,0026     | 0,0532  | 0,0002     | 0,1142 | 0,0015     | 0,0230 | 0,0002     | <b><u>1,28E-05</u></b> | <b><u>3,63E-04</u></b> | <b><u>5,74E-05</u></b>     | 8,75E-01               |
| OTU_121   | unclassified_Lachnospiraceae (1)     | 0,2738  | 0,0000     | 0,0141  | 0,0005     | 0,0938 | 0,0000     | 0,0084 | 0,0003     | <b><u>1,90E-05</u></b> | <b><u>4,59E-04</u></b> | <b><u>1,09E-04</u></b>     | 9,95E-01               |
| OTU_686   | Clostridium XIVa sp. (0.917)         | 0,1164  | 0,0035     | 0,0045  | 0,0009     | 0,0392 | 0,0017     | 0,0042 | 0,0005     | <b><u>1,74E-05</u></b> | <b><u>4,34E-04</u></b> | <b><u>1,45E-04</u></b>     | 9,99E-01               |
| OTU_38    | unclassified_Lachnospiraceae (0.95)  | 0,5902  | 0,0046     | 0,6095  | 0,1079     | 0,1473 | 0,0019     | 0,1028 | 0,0606     | <b><u>1,32E-06</u></b> | <b><u>4,52E-05</u></b> | <b><u>1,53E-04</u></b>     | <b><u>7,54E-04</u></b> |
| OTU_778   | unclassified_Lachnospiraceae (0.958) | 0,3316  | 0,0160     | 0,0056  | 0,0000     | 0,1116 | 0,0075     | 0,0056 | 0,0000     | <b><u>1,44E-05</u></b> | <b><u>3,95E-04</u></b> | <b><u>1,81E-04</u></b>     | 1,00E+00               |
| OTU_1     | Akkermansia muciniphila (1)          | 3,7457  | 16,0994    | 16,4920 | 16,7105    | 1,6037 | 1,4209     | 2,4591 | 1,8943     | <b><u>1,68E-05</u></b> | <b><u>4,34E-04</u></b> | <b><u>2,01E-04</u></b>     | 1,00E+00               |
| OTU_23    | unclassified_Lachnospiraceae (0.941) | 2,4982  | 0,1082     | 0,9774  | 0,3947     | 0,7618 | 0,0536     | 0,2675 | 0,2180     | <b><u>2,48E-04</u></b> | <b><u>3,85E-03</u></b> | <b><u>2,64E-04</u></b>     | 6,80E-01               |
| OTU_315   | Clostridium XIVb sp. (0.693)         | 0,0093  | 0,0002     | 0,0024  | 0,0002     | 0,0031 | 0,0002     | 0,0010 | 0,0002     | <b><u>1,03E-04</u></b> | <b><u>1,87E-03</u></b> | <b><u>2,75E-04</u></b>     | 7,01E-01               |
| OTU_4     | Allobaculum sp. (0.904)              | 0,7067  | 10,3794    | 0,7416  | 5,8125     | 0,4004 | 2,7292     | 0,3523 | 1,0514     | <b><u>4,34E-05</u></b> | <b><u>9,37E-04</u></b> | <b><u>3,33E-04</u></b>     | 9,42E-02               |
| OTU_28    | Anaerotruncus sp. (1)                | 3,2539  | 0,1021     | 0,1723  | 0,0457     | 1,1587 | 0,0573     | 0,1088 | 0,0237     | <b><u>5,62E-05</u></b> | <b><u>1,15E-03</u></b> | <b><u>3,44E-04</u></b>     | 9,98E-01               |
| OTU_533   | unclassified_Bacteria (1)            | 0,0035  | 0,0002     | 0,0007  | 0,0000     | 0,0012 | 0,0002     | 0,0004 | 0,0000     | <b><u>1,37E-04</u></b> | <b><u>2,34E-03</u></b> | <b><u>6,39E-04</u></b>     | 7,69E-01               |
| OTU_246   | unclassified_Lachnospiraceae (0.967) | 0,0325  | 0,0000     | 0,0250  | 0,0023     | 0,0094 | 0,0000     | 0,0068 | 0,0015     | <b><u>7,09E-05</u></b> | <b><u>1,39E-03</u></b> | <b><u>6,93E-04</u></b>     | <b><u>1,98E-02</u></b> |
| OTU_168   | unclassified_Lachnospiraceae (0.913) | 0,0544  | 0,0026     | 0,0387  | 0,0026     | 0,0154 | 0,0019     | 0,0105 | 0,0015     | <b><u>6,28E-05</u></b> | <b><u>1,26E-03</u></b> | <b><u>6,95E-04</u></b>     | <b><u>1,98E-02</u></b> |
| OTU_5     | unclassified_Lachnospiraceae (1)     | 7,1128  | 0,0032     | 8,8837  | 2,3377     | 2,1901 | 0,0012     | 1,1914 | 0,7872     | <b><u>2,62E-06</u></b> | <b><u>7,96E-05</u></b> | <b><u>7,60E-04</u></b>     | <b><u>1,21E-03</u></b> |
| OTU_266   | unclassified_Clostridiales (0.689)   | 0,0138  | 0,0002     | 0,0092  | 0,0002     | 0,0043 | 0,0002     | 0,0026 | 0,0002     | <b><u>9,19E-05</u></b> | <b><u>1,72E-03</u></b> | <b><u>7,63E-04</u></b>     | <b><u>3,15E-02</u></b> |
| OTU_162   | Anaerotruncus sp. (1)                | 0,0283  | 0,0026     | 0,0581  | 0,0067     | 0,0043 | 0,0011     | 0,0073 | 0,0024     | <b><u>2,53E-13</u></b> | <b><u>5,19E-11</u></b> | <b><u>1,00E-03</u></b>     | <b><u>4,43E-11</u></b> |
| OTU_238   | unclassified_Lachnospiraceae (1)     | 0,0276  | 0,0000     | 0,0000  | 0,0000     | 0,0111 | 0,0000     | 0,0000 | 0,0000     | <b><u>2,09E-04</u></b> | <b><u>3,37E-03</u></b> | <b><u>1,02E-03</u></b>     | 1,00E+00               |
| OTU_27    | unclassified_Lachnospiraceae (0.926) | 1,0364  | 0,0019     | 0,0476  | 0,0028     | 0,4120 | 0,0012     | 0,0434 | 0,0023     | <b><u>2,70E-04</u></b> | <b><u>4,11E-03</u></b> | <b><u>1,05E-03</u></b>     | 9,98E-01               |
| OTU_308   | Clostridium XIVb sp. (0.971)         | 0,0106  | 0,0005     | 0,0052  | 0,0000     | 0,0035 | 0,0003     | 0,0018 | 0,0000     | <b><u>3,30E-04</u></b> | <b><u>4,76E-03</u></b> | <b><u>1,37E-03</u></b>     | 1,63E-01               |
| OTU_445   | unclassified_Lachnospiraceae (1)     | 0,0044  | 0,0000     | 0,0000  | 0,0002     | 0,0018 | 0,0000     | 0,0000 | 0,0002     | <b><u>4,72E-04</u></b> | <b><u>6,05E-03</u></b> | <b><u>1,63E-03</u></b>     | 9,97E-01               |
| OTU_373   | Ruminococcus sp. (1)                 | 0,0047  | 0,0005     | 0,0017  | 0,0023     | 0,0013 | 0,0003     | 0,0006 | 0,0007     | <b><u>3,39E-03</u></b> | <b><u>3,24E-02</u></b> | <b><u>1,70E-03</u></b>     | 9,39E-01               |

|         |                                      |        |         |        |        |        |        |        |        |                        |                        |                        |                        |
|---------|--------------------------------------|--------|---------|--------|--------|--------|--------|--------|--------|------------------------|------------------------|------------------------|------------------------|
| OTU_899 | unclassified_Lachnospiraceae (0.924) | 0,0018 | 0,0000  | 0,0000 | 0,0000 | 0,0007 | 0,0000 | 0,0000 | 0,0000 | <b><u>4,19E-04</u></b> | <b><u>5,55E-03</u></b> | <b><u>1,80E-03</u></b> | 1,00E+00               |
| OTU_69  | unclassified_Ruminococcaceae (1)     | 0,5870 | 0,0208  | 0,0005 | 0,0002 | 0,2401 | 0,0119 | 0,0005 | 0,0002 | <b><u>3,56E-04</u></b> | <b><u>4,87E-03</u></b> | <b><u>2,12E-03</u></b> | 1,00E+00               |
| OTU_898 | Allobaculum sp. (0.922)              | 0,0003 | 0,0026  | 0,0000 | 0,0000 | 0,0003 | 0,0008 | 0,0000 | 0,0000 | <b><u>5,37E-05</u></b> | <b><u>1,13E-03</u></b> | <b><u>2,52E-03</u></b> | 1,00E+00               |
| OTU_24  | Oscillibacter sp. (1)                | 1,4823 | 0,0185  | 1,1643 | 0,0528 | 0,5453 | 0,0087 | 0,2900 | 0,0236 | <b><u>3,56E-04</u></b> | <b><u>4,87E-03</u></b> | <b><u>3,46E-03</u></b> | <b><u>2,84E-02</u></b> |
| OTU_20  | Barnesiella sp. (1)                  | 2,0308 | 0,8092  | 1,2184 | 0,9598 | 0,3307 | 0,2292 | 0,1246 | 0,2662 | <b><u>5,12E-03</u></b> | <b><u>4,52E-02</u></b> | <b><u>4,85E-03</u></b> | 8,66E-01               |
| OTU_800 | Clostridium XIVA sp. (0.95)          | 0,0029 | 0,0000  | 0,0000 | 0,0002 | 0,0013 | 0,0000 | 0,0000 | 0,0002 | <b><u>2,08E-03</u></b> | <b><u>2,22E-02</u></b> | <b><u>5,17E-03</u></b> | 9,91E-01               |
| OTU_883 | Coprococcus (0.971)                  | 0,0105 | 0,0005  | 0,0053 | 0,0000 | 0,0042 | 0,0003 | 0,0016 | 0,0000 | <b><u>1,66E-03</u></b> | <b><u>1,82E-02</u></b> | <b><u>5,33E-03</u></b> | 2,32E-01               |
| OTU_2   | Bacteroides dorei (1)                | 3,8797 | 19,0906 | 3,0600 | 9,2944 | 1,1699 | 5,3702 | 0,4417 | 2,2460 | <b><u>1,43E-03</u></b> | <b><u>1,63E-02</u></b> | <b><u>6,42E-03</u></b> | 4,69E-01               |
| OTU_19  | Escherichia coli (1)                 | 0,0033 | 2,1446  | 0,0017 | 1,4994 | 0,0013 | 0,6870 | 0,0007 | 0,4799 | <b><u>9,82E-04</u></b> | <b><u>1,20E-02</u></b> | <b><u>6,82E-03</u></b> | 7,41E-02               |
| OTU_141 | unclassified_Ruminococcaceae (1)     | 0,9209 | 0,0042  | 1,5611 | 0,0531 | 0,2602 | 0,0023 | 0,2878 | 0,0144 | <b><u>5,02E-08</u></b> | <b><u>2,57E-06</u></b> | <b><u>7,03E-03</u></b> | <b><u>1,29E-06</u></b> |
| OTU_142 | Oscillibacter sp. (1)                | 0,1970 | 0,0423  | 0,1706 | 0,0835 | 0,0333 | 0,0214 | 0,0439 | 0,0247 | <b><u>3,32E-03</u></b> | <b><u>3,21E-02</u></b> | <b><u>7,69E-03</u></b> | 2,11E-01               |
| OTU_8   | Bacteroides acidifaciens (1)         | 3,6139 | 1,0657  | 2,9539 | 0,6373 | 0,6046 | 0,8103 | 0,3032 | 0,1616 | <b><u>2,96E-04</u></b> | <b><u>4,34E-03</u></b> | <b><u>7,94E-03</u></b> | <b><u>1,24E-02</u></b> |
| OTU_264 | unclassified_Lachnospiraceae (0.929) | 0,0095 | 0,0005  | 0,0089 | 0,0044 | 0,0029 | 0,0003 | 0,0022 | 0,0017 | <b><u>4,12E-03</u></b> | <b><u>3,80E-02</u></b> | <b><u>9,82E-03</u></b> | 3,31E-01               |
| OTU_839 | unclassified_Lachnospiraceae (1)     | 0,0038 | 0,0002  | 0,0000 | 0,0000 | 0,0017 | 0,0002 | 0,0000 | 0,0000 | <b><u>2,28E-03</u></b> | <b><u>2,31E-02</u></b> | <b><u>1,08E-02</u></b> | 1,00E+00               |
| OTU_165 | Barnesiella sp. (1)                  | 0,0700 | 0,0173  | 0,0153 | 0,0056 | 0,0230 | 0,0095 | 0,0045 | 0,0035 | <b><u>1,38E-03</u></b> | <b><u>1,63E-02</u></b> | <b><u>1,28E-02</u></b> | 9,29E-01               |
| OTU_26  | unclassified_Ruminococcaceae (0.909) | 1,3296 | 0,1247  | 1,2442 | 0,3859 | 0,5113 | 0,0581 | 0,2655 | 0,1395 | <b><u>3,95E-03</u></b> | <b><u>3,73E-02</u></b> | <b><u>1,74E-02</u></b> | 1,15E-01               |
| OTU_561 | unclassified_Clostridiales (1)       | 0,0003 | 0,0017  | 0,0002 | 0,0000 | 0,0003 | 0,0005 | 0,0002 | 0,0000 | <b><u>1,43E-03</u></b> | <b><u>1,63E-02</u></b> | <b><u>2,10E-02</u></b> | 9,46E-01               |
| OTU_177 | unclassified_Lachnospiraceae (1)     | 0,0451 | 0,0002  | 0,0516 | 0,0067 | 0,0172 | 0,0002 | 0,0153 | 0,0029 | <b><u>1,59E-03</u></b> | <b><u>1,79E-02</u></b> | <b><u>3,29E-02</u></b> | <b><u>2,31E-02</u></b> |
| OTU_55  | unclassified_Lachnospiraceae (0.912) | 0,3560 | 0,1059  | 0,5460 | 0,2480 | 0,0561 | 0,0482 | 0,0726 | 0,0650 | <b><u>3,06E-05</u></b> | <b><u>6,97E-04</u></b> | <b><u>3,42E-02</u></b> | <b><u>4,78E-03</u></b> |
| OTU_77  | unclassified_Lachnospiraceae (0.963) | 0,1577 | 0,0114  | 0,1336 | 0,1956 | 0,0320 | 0,0060 | 0,0265 | 0,0594 | <b><u>4,26E-03</u></b> | <b><u>3,88E-02</u></b> | <b><u>3,90E-02</u></b> | 6,19E-01               |
| OTU_6   | Shigella boydii (1)                  | 0,0138 | 9,0662  | 0,0067 | 8,6465 | 0,0038 | 3,2828 | 0,0014 | 3,0475 | <b><u>4,62E-03</u></b> | <b><u>4,12E-02</u></b> | <b><u>4,67E-02</u></b> | <b><u>4,64E-02</u></b> |
| OTU_80  | unclassified_Ruminococcaceae (0.976) | 0,3731 | 0,0038  | 0,6436 | 0,0045 | 0,1426 | 0,0032 | 0,1515 | 0,0019 | <b><u>1,73E-05</u></b> | <b><u>4,34E-04</u></b> | 6,40E-02               | <b><u>1,16E-04</u></b> |
| OTU_803 | Oscillibacter sp. (0.98)             | 0,2970 | 0,1097  | 0,3433 | 0,0488 | 0,0467 | 0,0606 | 0,0668 | 0,0133 | <b><u>1,74E-04</u></b> | <b><u>2,92E-03</u></b> | 7,02E-02               | <b><u>6,33E-04</u></b> |
| OTU_14  | Oscillibacter sp. (1)                | 1,6721 | 0,0064  | 2,5709 | 0,2562 | 0,7509 | 0,0030 | 0,6850 | 0,1149 | <b><u>7,50E-04</u></b> | <b><u>9,47E-03</u></b> | 9,63E-02               | <b><u>5,63E-03</u></b> |
| OTU_110 | unclassified_Lachnospiraceae (1)     | 0,0636 | 0,0026  | 0,1821 | 0,0024 | 0,0237 | 0,0018 | 0,0317 | 0,0008 | <b><u>3,60E-09</u></b> | <b><u>1,97E-07</u></b> | 1,49E-01               | <b><u>4,28E-08</u></b> |
| OTU_249 | unclassified_Lachnospiraceae (0.78)  | 0,0073 | 0,0014  | 0,0264 | 0,0040 | 0,0031 | 0,0010 | 0,0037 | 0,0015 | <b><u>1,40E-09</u></b> | <b><u>8,82E-08</u></b> | 3,94E-01               | <b><u>1,18E-07</u></b> |
| OTU_115 | Bacteroides eggerthii (1)            | 0,0675 | 0,0205  | 0,1252 | 0,0398 | 0,0353 | 0,0127 | 0,0219 | 0,0078 | <b><u>3,09E-03</u></b> | <b><u>3,02E-02</u></b> | 4,02E-01               | <b><u>1,98E-02</u></b> |
| OTU_203 | unclassified_Lachnospiraceae (1)     | 0,0069 | 0,0000  | 0,0143 | 0,0002 | 0,0031 | 0,0000 | 0,0052 | 0,0002 | <b><u>2,75E-03</u></b> | <b><u>2,72E-02</u></b> | 4,04E-01               | <b><u>6,94E-03</u></b> |
| OTU_22  | Pseudoflavonifractor sp. (1)         | 1,1171 | 0,0002  | 2,6400 | 0,0163 | 0,5560 | 0,0002 | 0,8527 | 0,0080 | <b><u>7,98E-04</u></b> | <b><u>9,92E-03</u></b> | 4,32E-01               | <b><u>2,15E-03</u></b> |
| OTU_190 | unclassified_Ruminococcaceae (1)     | 0,1706 | 0,0268  | 0,5560 | 0,0341 | 0,0647 | 0,0157 | 0,1291 | 0,0221 | <b><u>3,42E-06</u></b> | <b><u>1,00E-04</u></b> | 5,47E-01               | <b><u>2,09E-05</u></b> |
| OTU_12  | Alistipes finegoldii (1)             | 1,5673 | 0,8634  | 3,1714 | 1,5837 | 0,3895 | 0,1720 | 0,5477 | 0,2617 | <b><u>2,92E-04</u></b> | <b><u>4,34E-03</u></b> | 5,60E-01               | <b><u>1,49E-02</u></b> |
| OTU_91  | unclassified_Lachnospiraceae (1)     | 0,0231 | 0,0016  | 0,0799 | 0,0073 | 0,0141 | 0,0016 | 0,0233 | 0,0030 | <b><u>3,41E-04</u></b> | <b><u>4,83E-03</u></b> | 7,03E-01               | <b><u>1,68E-03</u></b> |
| OTU_230 | unclassified_Lachnospiraceae (0.942) | 0,0069 | 0,0017  | 0,0182 | 0,0028 | 0,0043 | 0,0009 | 0,0055 | 0,0010 | <b><u>4,32E-03</u></b> | <b><u>3,90E-02</u></b> | 7,29E-01               | <b><u>1,21E-02</u></b> |
| OTU_235 | unclassified_Lachnospiraceae (1)     | 0,0066 | 0,0000  | 0,0475 | 0,0039 | 0,0038 | 0,0000 | 0,0078 | 0,0014 | <b><u>4,29E-11</u></b> | <b><u>3,52E-09</u></b> | 7,39E-01               | <b><u>7,56E-09</u></b> |
| OTU_11  | Barnesiella sp. (1)                  | 1,1113 | 2,4785  | 0,4238 | 5,5727 | 0,4497 | 0,8333 | 0,1166 | 1,5881 | <b><u>1,40E-03</u></b> | <b><u>1,63E-02</u></b> | 7,60E-01               | <b><u>1,38E-03</u></b> |
| OTU_281 | Ruminococcus sp. (1)                 | 0,0029 | 0,0012  | 0,0095 | 0,0009 | 0,0014 | 0,0006 | 0,0024 | 0,0005 | <b><u>1,37E-04</u></b> | <b><u>2,34E-03</u></b> | 8,50E-01               | <b><u>3,82E-04</u></b> |
| OTU_199 | Alistipes sp. (1)                    | 0,0077 | 0,0016  | 0,0152 | 0,0362 | 0,0049 | 0,0009 | 0,0036 | 0,0087 | <b><u>1,15E-04</u></b> | <b><u>2,06E-03</u></b> | 8,63E-01               | <b><u>3,14E-02</u></b> |
| OTU_139 | unclassified_Ruminococcaceae (1)     | 0,0277 | 0,0026  | 0,1344 | 0,0107 | 0,0172 | 0,0009 | 0,0409 | 0,0076 | <b><u>2,45E-04</u></b> | <b><u>3,85E-03</u></b> | 8,75E-01               | <b><u>1,34E-03</u></b> |
| OTU_241 | Oxalobacter sp. (0.979)              | 0,0052 | 0,0030  | 0,0155 | 0,0058 | 0,0030 | 0,0012 | 0,0029 | 0,0022 | <b><u>1,79E-03</u></b> | <b><u>1,93E-02</u></b> | 9,22E-01               | <b><u>2,37E-02</u></b> |
| OTU_812 | unclassified_Ruminococcaceae (0.954) | 0,0003 | 0,0000  | 0,0024 | 0,0000 | 0,0003 | 0,0000 | 0,0009 | 0,0000 | <b><u>2,24E-03</u></b> | <b><u>2,31E-02</u></b> | 9,79E-01               | <b><u>6,04E-03</u></b> |
| OTU_126 | Barnesiella sp. (1)                  | 0,1442 | 0,1649  | 0,0007 | 0,0000 | 0,0410 | 0,0629 | 0,0007 | 0,0000 | <b><u>1,42E-03</u></b> | <b><u>1,63E-02</u></b> | 9,81E-01               | 1,00E+00               |
| OTU_195 | Romboutsia ilealis (1)               | 0,0029 | 0,0000  | 0,0338 | 0,0012 | 0,0014 | 0,0000 | 0,0100 | 0,0007 | <b><u>2,03E-05</u></b> | <b><u>4,77E-04</u></b> | 9,82E-01               | <b><u>1,92E-04</u></b> |
| OTU_262 | Clostridium XIVA sp. (1)             | 0,0003 | 0,0000  | 0,0031 | 0,0005 | 0,0003 | 0,0000 | 0,0011 | 0,0003 | <b><u>1,64E-03</u></b> | <b><u>1,82E-02</u></b> | 9,88E-01               | <b><u>1,44E-02</u></b> |

|         |                                      |        |        |        |        |        |        |        |        |                        |                        |          |                        |
|---------|--------------------------------------|--------|--------|--------|--------|--------|--------|--------|--------|------------------------|------------------------|----------|------------------------|
| OTU_231 | Enterorhabdus sp. (0.928)            | 0,0028 | 0,0040 | 0,0160 | 0,0088 | 0,0014 | 0,0024 | 0,0032 | 0,0030 | <b><u>4,12E-03</u></b> | <b><u>3,80E-02</u></b> | 9,89E-01 | 2,30E-01               |
| OTU_155 | unclassified_Ruminococcaceae (1)     | 0,0259 | 0,0163 | 0,1774 | 0,1117 | 0,0082 | 0,0119 | 0,0454 | 0,0301 | <b><u>4,60E-04</u></b> | <b><u>6,00E-03</u></b> | 9,96E-01 | 3,76E-01               |
| OTU_615 | unclassified_Ruminococcaceae (0.922) | 0,0139 | 0,0024 | 0,4724 | 0,0925 | 0,0101 | 0,0015 | 0,1186 | 0,0300 | <b><u>1,90E-06</u></b> | <b><u>6,00E-05</u></b> | 9,99E-01 | <b><u>3,54E-04</u></b> |
| OTU_90  | Alistipes shahii (1)                 | 0,0106 | 0,0014 | 0,0288 | 0,6103 | 0,0055 | 0,0007 | 0,0096 | 0,1243 | <b><u>8,25E-10</u></b> | <b><u>6,16E-08</u></b> | 1,00E+00 | <b><u>9,75E-08</u></b> |
| OTU_305 | unclassified_Erysipelotrichaceae (1) | 0,0003 | 0,0000 | 0,0128 | 0,0000 | 0,0003 | 0,0000 | 0,0054 | 0,0000 | <b><u>2,71E-03</u></b> | <b><u>2,71E-02</u></b> | 1,00E+00 | <b><u>8,92E-03</u></b> |
| OTU_175 | unclassified_Lachnospiraceae (0.917) | 0,0006 | 0,0000 | 0,0661 | 0,0005 | 0,0004 | 0,0000 | 0,0168 | 0,0003 | <b><u>2,53E-07</u></b> | <b><u>1,04E-05</u></b> | 1,00E+00 | <b><u>5,75E-06</u></b> |
| OTU_70  | unclassified_Lachnospiraceae (1)     | 0,0113 | 0,0072 | 0,1811 | 0,7528 | 0,0055 | 0,0050 | 0,0370 | 0,2448 | <b><u>2,05E-04</u></b> | <b><u>3,36E-03</u></b> | 1,00E+00 | <b><u>1,14E-02</u></b> |
| OTU_422 | Clostridium XIVb sp. (0.925)         | 0,0007 | 0,0000 | 0,1305 | 0,0052 | 0,0007 | 0,0000 | 0,0536 | 0,0033 | <b><u>2,24E-03</u></b> | <b><u>2,31E-02</u></b> | 1,00E+00 | <b><u>1,04E-02</u></b> |
| OTU_151 | unclassified_Lachnospiraceae (1)     | 0,0000 | 0,0000 | 0,0034 | 0,0000 | 0,0000 | 0,0000 | 0,0013 | 0,0000 | <b><u>3,91E-04</u></b> | <b><u>5,26E-03</u></b> | 1,00E+00 | <b><u>2,04E-03</u></b> |
| OTU_401 | Clostridium XIVa sp. (0.925)         | 0,0000 | 0,0000 | 0,0054 | 0,0007 | 0,0000 | 0,0000 | 0,0022 | 0,0004 | <b><u>2,26E-03</u></b> | <b><u>2,31E-02</u></b> | 1,00E+00 | <b><u>1,98E-02</u></b> |
