# Supplementary material for: Targeting the gut microbiota with inulin-type fructans: preclinical demonstration of a novel approach in the management of endothelial dysfunction
Source: PubMed Central journal article supplement — Gut. 2017 Apr 4;67(2):271–83. doi: 10.1136/gutjnl-2016-313316 (PMC5868295; doi:10.1136/gutjnl-2016-313316), 2017-04-04
Supplement: gutjnl-2016-313316supp004.pdf [file gutjnl-2016-313316supp004.pdf]

## Systemic BA versus bact taxa

Spearman's r correlation coefficient between systemic bile acid profile and significantly affected bacterial taxa.  
q value

|       | <b>Ruminococcace<br/>ae_f</b> | <b>Flavonifactor_g</b>     | <b>Butyricicoccus_g</b>    | <b>Anaerotruncus_g</b>     | <b>Sporobacter_g</b> |
|-------|-------------------------------|----------------------------|----------------------------|----------------------------|----------------------|
| CA    | <b><u>0,0436925108</u></b>    | 0,0629035497               | <b><u>0,0387224585</u></b> | <b><u>0,0488269241</u></b> | 0,5958500098         |
| CDCA  | 0,0629035497                  | 0,0753543234               | <b><u>0,042625721</u></b>  | 0,1198428053               | 0,9181317271         |
| DCA   | 0,0866767342                  | <b><u>0,0232614449</u></b> | <b><u>0,0482030397</u></b> | 0,1063819563               | 0,6926907159         |
| UDCA  | 0,1423812831                  | 0,0629035497               | 0,0629035497               | 0,0795285383               | 0,8907874502         |
| bMCA  | 0,0636959875                  | 0,0866767342               | <b><u>0,0211453987</u></b> | 0,0618342121               | 0,8907874502         |
| wMCA  | 0,2150107601                  | 0,507460124                | 0,1481229385               | 0,1063819563               | 0,4832238904         |
| TCA   | 0,7679140751                  | 0,7903196544               | 0,9569983076               | 0,9569983076               | 0,4832238904         |
| TCDCA | 0,7587213633                  | 0,7602722321               | 0,9569983076               | 0,9181317271               | 0,4832238904         |
| TDCA  | 0,6316499468                  | 0,5958500098               | 0,4609429355               | 0,4807648014               | 0,5750901634         |
| TUDCA | 0,7009287858                  | 0,6926907159               | 0,8907874502               | 0,7009287858               | 0,4832238904         |
| TaMCA | 0,6247161916                  | 0,6337400717               | 0,8650049057               | 0,7602722321               | 0,4832238904         |
| TbMCA | 0,4615314045                  | 0,4869966464               | 0,5958500098               | 0,5958500098               | 0,4832238904         |
| TwMCA | 0,6926907159                  | 0,7872112282               | 0,3417297646               | 0,5958500098               | 0,4832238904         |
| THDCA | 0,5958500098                  | 0,7911330147               | 0,7453655117               | 0,6926907159               | <b><u>0</u></b>      |

r value

|       | <b>Ruminococcace<br/>ae_f</b> | <b>Flavonifactor_g</b>      | <b>Butyricicoccus_g</b>     | <b>Anaerotruncus_g</b>     | <b>Sporobacter_g</b> |
|-------|-------------------------------|-----------------------------|-----------------------------|----------------------------|----------------------|
| CA    | <b><u>-0,8321678042</u></b>   | <b><u>-0,7746670842</u></b> | <b><u>-0,8397744298</u></b> | <b><u>0,8181818128</u></b> | 0,3930418193         |
| CDCA  | <b><u>-0,7980473638</u></b>   | <b><u>-0,7799948454</u></b> | <b><u>-0,8577941656</u></b> | <b><u>0,713781476</u></b>  | 0,1090499535         |
| DCA   | <b><u>0,7178626657</u></b>    | <b><u>0,8762859702</u></b>  | <b><u>0,8243315816</u></b>  | -0,6961092353              | -0,3169834018        |
| UDCA  | -0,6671046615                 | <b><u>-0,7740526199</u></b> | <b><u>-0,7778903246</u></b> | <b><u>0,7468671799</u></b> | 0,1358500272         |
| bMCA  | <b><u>-0,769230783</u></b>    | <b><u>-0,7183277011</u></b> | <b><u>-0,8845623732</u></b> | <b><u>0,7902097702</u></b> | 0,1310139447         |
| wMCA  | -0,6129606366                 | -0,4691423774               | -0,6617805362               | 0,697023809                | 0,4812265038         |
| TCA   | -0,2556921542                 | -0,2363348752               | -0,0523442216               | 0,0595447496               | -0,4812265038        |
| TCDCA | -0,2727272809                 | -0,2676122785               | -0,0522526316               | 0,0909090936               | -0,480384469         |
| TDCA  | 0,3747816682                  | 0,4232863486                | 0,5122255683                | -0,4938711524              | -0,4374786317        |
| TUDCA | -0,3006992936                 | -0,3309941292               | -0,1418285668               | 0,3006992936               | -0,480384469         |
| TaMCA | -0,377622366                  | -0,3732486963               | -0,1716872156               | 0,2587412596               | -0,480384469         |
| TbMCA | -0,5104895234                 | -0,4788851142               | -0,4142886996               | 0,3986014128               | -0,480384469         |
| TwMCA | 0,3076923192                  | 0,2394425571                | 0,5561172962                | -0,3986014128              | -0,480384469         |
| THDCA | -0,3930418193                 | -0,2198997438               | -0,2797007859               | 0,3056991994               | <b><u>1</u></b>      |

Systemic BA versus bact taxa

| unclassified_Ru<br>minococcaceae | Lachnospiraceae<br>_f      | unclassified_Lac<br>hnospiraceae | Erysipelotrichia_<br>c     | Erysipelotrichale<br>s_o   | Erysipelotrichac<br>eae_f  |
|----------------------------------|----------------------------|----------------------------------|----------------------------|----------------------------|----------------------------|
| <b><u>0,0228247612</u></b>       | 0,0629035497               | 0,0790761683                     | 0,1993932916               | 0,1993932916               | 0,1993932916               |
| 0,0629035497                     | 0,0629035497               | 0,0629035497                     | 0,0865595646               | 0,0865595646               | 0,0865595646               |
| 0,0557078634                     | <b><u>0,0232614449</u></b> | <b><u>0,0232614449</u></b>       | 0,3148650689               | 0,3148650689               | 0,3148650689               |
| 0,0795285383                     | 0,0866767342               | 0,0866767342                     | <b><u>0,0482030397</u></b> | <b><u>0,0482030397</u></b> | <b><u>0,0482030397</u></b> |
| 0,0913305499                     | 0,2636586607               | 0,2798813553                     | 0,0629035497               | 0,0629035497               | 0,0629035497               |
| 0,2525730073                     | 0,5623584468               | 0,611138384                      | 0,0753543234               | 0,0753543234               | 0,0753543234               |
| 0,7587213633                     | 0,8907874502               | 0,8054599547                     | 0,7540094908               | 0,7540094908               | 0,7540094908               |
| 0,7587213633                     | 0,8907874502               | 0,7911330147                     | 0,7602722321               | 0,7602722321               | 0,7602722321               |
| 0,5960333154                     | 0,4759122926               | 0,5529294247                     | 0,1231096678               | 0,1231096678               | 0,1231096678               |
| 0,7911330147                     | 0,85940153                 | 0,7602722321                     | 0,9181317271               | 0,9181317271               | 0,9181317271               |
| 0,6926907159                     | 0,7325029714               | 0,6562347266                     | 0,8907874502               | 0,8907874502               | 0,8907874502               |
| 0,5958500098                     | 0,7009287858               | 0,6247161916                     | 0,7779035816               | 0,7779035816               | 0,7779035816               |
| 0,6926907159                     | 0,4941903303               | 0,5958500098                     | 0,1111532141               | 0,1111532141               | 0,1111532141               |
| 0,5958500098                     | 0,5958500098               | 0,6926907159                     | 0,7911330147               | 0,7911330147               | 0,7911330147               |

| unclassified_Ru<br>minococcaceae | Lachnospiraceae<br>_f       | unclassified_Lac<br>hnospiraceae | Erysipelotrichia_<br>c     | Erysipelotrichale<br>s_o   | Erysipelotrichac<br>eae_f  |
|----------------------------------|-----------------------------|----------------------------------|----------------------------|----------------------------|----------------------------|
| <b><u>-0,8811188936</u></b>      | <b><u>-0,7762237787</u></b> | <b><u>-0,7482517362</u></b>      | 0,622377634                | 0,622377634                | 0,622377634                |
| <b><u>-0,7980473638</u></b>      | <b><u>-0,7980473638</u></b> | <b><u>-0,7980473638</u></b>      | <b><u>0,753436029</u></b>  | <b><u>0,753436029</u></b>  | <b><u>0,753436029</u></b>  |
| <b><u>0,8048763275</u></b>       | <b><u>0,8773877025</u></b>  | <b><u>0,8773877025</u></b>       | -0,5655887723              | -0,5655887723              | -0,5655887723              |
| <b><u>-0,7468671799</u></b>      | <b><u>-0,7251138091</u></b> | <b><u>-0,7178626657</u></b>      | <b><u>0,8193785548</u></b> | <b><u>0,8193785548</u></b> | <b><u>0,8193785548</u></b> |
| <b><u>-0,7132866979</u></b>      | -0,5874125957               | -0,5804196                       | <b><u>0,7762237787</u></b> | <b><u>0,7762237787</u></b> | <b><u>0,7762237787</u></b> |
| -0,5954474807                    | -0,4483369291               | -0,3852895498                    | <b><u>0,7530659437</u></b> | <b><u>0,7530659437</u></b> | <b><u>0,7530659437</u></b> |
| -0,2732053101                    | -0,1401052922               | -0,2101579458                    | -0,2767079473              | -0,2767079473              | -0,2767079473              |
| -0,2727272809                    | -0,1468531489               | -0,2237762213                    | -0,2587412596              | -0,2587412596              | -0,2587412596              |
| 0,3922948241                     | 0,4973737895                | 0,4518395662                     | -0,68301332                | -0,68301332                | -0,68301332                |
| -0,2307692319                    | -0,1818181872               | -0,2587412596                    | 0,0909090936               | 0,0909090936               | 0,0909090936               |
| -0,3426573575                    | -0,2867132723               | -0,3636363745                    | 0,1328671277               | 0,1328671277               | 0,1328671277               |
| -0,3986014128                    | -0,3006992936               | -0,377622366                     | 0,2447552383               | 0,2447552383               | 0,2447552383               |
| 0,3216783106                     | 0,4755244851                | 0,4055944085                     | -0,6923077106              | -0,6923077106              | -0,6923077106              |
| -0,3930418193                    | -0,3930418193               | -0,3056991994                    | 0,2183565795               | 0,2183565795               | 0,2183565795               |

Systemic BA versus bact taxa

| unclassified_Ent<br>erococcaceae | Deltaproteobacte<br>ria_c  | Desulfovibrional<br>es_o  | unclassified_Des<br>ulfovibrionales | Betaproteobacte<br>ria_c   | Burkholderiales_<br>o      |
|----------------------------------|----------------------------|---------------------------|-------------------------------------|----------------------------|----------------------------|
| 0,5958500098                     | 0,0837013584               | 0,0813114757              | 0,0813114757                        | 0,0561194649               | 0,0561194649               |
| 0,9181317271                     | 0,0629035497               | 0,0629035497              | 0,0629035497                        | 0,0557078634               | 0,0557078634               |
| 0,6926907159                     | <b><u>0,0381779652</u></b> | <b><u>0,042625721</u></b> | <b><u>0,042625721</u></b>           | 0,1484576184               | 0,1484576184               |
| 0,8907874502                     | 0,0866767342               | 0,0866767342              | 0,0866767342                        | <b><u>0,0482030397</u></b> | <b><u>0,0482030397</u></b> |
| 0,8907874502                     | 0,1773402596               | 0,1442447692              | 0,1442447692                        | <b><u>0,0118611582</u></b> | <b><u>0,0118611582</u></b> |
| 0,4832238904                     | 0,5229178248               | 0,4832238904              | 0,4832238904                        | <b><u>0,0319608657</u></b> | <b><u>0,0319608657</u></b> |
| 0,4832238904                     | 0,8907874502               | 0,8907874502              | 0,8907874502                        | 0,902314                   | 0,902314                   |
| 0,4832238904                     | 0,8988489559               | 0,8907874502              | 0,8907874502                        | 0,8907874502               | 0,8907874502               |
| 0,5750901634                     | 0,6785573967               | 0,6668859678              | 0,6668859678                        | 0,2085113648               | 0,2085113648               |
| 0,4832238904                     | 0,9569983076               | 0,9725442936              | 0,9725442936                        | 0,977440399                | 0,977440399                |
| 0,4832238904                     | 0,8907874502               | 0,8707508108              | 0,8707508108                        | 0,8988489559               | 0,8988489559               |
| 0,4832238904                     | 0,8054599547               | 0,7779035816              | 0,7779035816                        | 0,6926907159               | 0,6926907159               |
| 0,4832238904                     | 0,6378569673               | 0,6785573967              | 0,6785573967                        | 0,0866767342               | 0,0866767342               |
| <b><u>0</u></b>                  | 0,5958500098               | 0,5958500098              | 0,5958500098                        | 0,5958500098               | 0,5958500098               |

| unclassified_Ent<br>erococcaceae | Deltaproteobacte<br>ria_c   | Desulfovibrional<br>es_o    | unclassified_Des<br>ulfovibrionales | Betaproteobacte<br>ria_c    | Burkholderiales_<br>o       |
|----------------------------------|-----------------------------|-----------------------------|-------------------------------------|-----------------------------|-----------------------------|
| 0,3930418193                     | <b><u>-0,7342657447</u></b> | <b><u>-0,7412587404</u></b> | <b><u>-0,7412587404</u></b>         | <b><u>0,7972028255</u></b>  | <b><u>0,7972028255</u></b>  |
| 0,1090499535                     | <b><u>-0,8079609871</u></b> | <b><u>-0,8079609871</u></b> | <b><u>-0,8079609871</u></b>         | <b><u>0,8277882934</u></b>  | <b><u>0,8277882934</u></b>  |
| -0,3169834018                    | <b><u>0,8411319852</u></b>  | <b><u>0,8338808417</u></b>  | <b><u>0,8338808417</u></b>          | -0,659853518                | -0,659853518                |
| 0,1358500272                     | <b><u>-0,7251138091</u></b> | <b><u>-0,7251138091</u></b> | <b><u>-0,7251138091</u></b>         | <b><u>0,8193785548</u></b>  | <b><u>0,8193785548</u></b>  |
| 0,1310139447                     | -0,6363636255               | -0,6643356681               | -0,6643356681                       | <b><u>0,9160839319</u></b>  | <b><u>0,9160839319</u></b>  |
| 0,4812265038                     | -0,4623474777               | -0,4868659079               | -0,4868659079                       | <b><u>0,8581449389</u></b>  | <b><u>0,8581449389</u></b>  |
| -0,4812265038                    | -0,1331000328               | -0,1506131887               | -0,1506131887                       | -0,1225921288               | -0,1225921288               |
| -0,480384469                     | -0,1258741319               | -0,1398601383               | -0,1398601383                       | -0,1328671277               | -0,1328671277               |
| -0,4374786317                    | 0,350263238                 | 0,3572685122                | 0,3572685122                        | -0,6164633036               | -0,6164633036               |
| -0,480384469                     | 0,0489510484                | 0,0279720277                | 0,0279720277                        | 0,0209790207                | 0,0209790207                |
| -0,480384469                     | -0,1538461596               | -0,167832166                | -0,167832166                        | 0,1258741319                | 0,1258741319                |
| -0,480384469                     | -0,2097902149               | -0,2447552383               | -0,2447552383                       | 0,3146853149                | 0,3146853149                |
| -0,480384469                     | 0,3706293702                | 0,3496503532                | 0,3496503532                        | <b><u>-0,7202796936</u></b> | <b><u>-0,7202796936</u></b> |
| <b><u>1</u></b>                  | -0,3930418193               | -0,3930418193               | -0,3930418193                       | 0,3930418193                | 0,3930418193                |

Systemic BA versus bact taxa

| Sutterellaceae_f    | Parasutterella_g    | unclassified_Del<br>taproteobacteria | Porphyrionad<br>aceae_f | Barnesiella_g       | Deferribacteres_<br>p |
|---------------------|---------------------|--------------------------------------|-------------------------|---------------------|-----------------------|
| <u>0,0482030397</u> | <u>0,0482030397</u> | 0,0865595646                         | 0,3854071964            | <u>0,0482030397</u> | 0,0561194649          |
| 0,0557078634        | 0,0557078634        | 0,0685126423                         | 0,2068480522            | 0,0817156804        | 0,0685126423          |
| 0,1677912393        | 0,1677912393        | <u>0,0319608657</u>                  | 0,4521277794            | <u>0,0320323697</u> | <u>0,0118611582</u>   |
| <u>0,0211453987</u> | <u>0,0211453987</u> | 0,0817156804                         | <u>0,0482030397</u>     | 0,0854550095        | 0,0629035497          |
| <u>0,0130426273</u> | <u>0,0130426273</u> | 0,1855908313                         | 0,0517626923            | 0,1822169296        | 0,0985145988          |
| <u>0,0246234276</u> | <u>0,0246234276</u> | 0,5429896876                         | 0,1393346999            | 0,4521277794        | 0,2630234948          |
| 0,9569983076        | 0,9569983076        | 0,9304315121                         | 0,8907874502            | 0,882638484         | 0,8907874502          |
| 0,9569983076        | 0,9569983076        | 0,9304315121                         | 0,9569983076            | 0,8907874502        | 0,85940153            |
| 0,4248675168        | 0,4248675168        | 0,6378569673                         | 0,5958500098            | 0,5708720592        | 0,1519388793          |
| 0,9653471423        | 0,9653471423        | 0,9569983076                         | 0,9059704169            | 0,8907874502        | 0,9569983076          |
| 0,8054599547        | 0,8054599547        | 0,9136901126                         | 0,7779035816            | 0,7911330147        | 0,9248239218          |
| 0,7009287858        | 0,7009287858        | 0,8707508108                         | 0,6926907159            | 0,7587213633        | 0,9181317271          |
| 0,1773402596        | 0,1773402596        | 0,6247161916                         | 0,6247161916            | 0,6926907159        | 0,1855908313          |
| 0,5958500098        | 0,5958500098        | 0,5958500098                         | 0,8907874502            | 0,5958500098        | 0,6668859678          |

| Sutterellaceae_f    | Parasutterella_g    | unclassified_Del<br>taproteobacteria | Porphyrionad<br>aceae_f | Barnesiella_g        | Deferribacteres_<br>p |
|---------------------|---------------------|--------------------------------------|-------------------------|----------------------|-----------------------|
| <u>0,8251748085</u> | <u>0,8251748085</u> | <u>-0,7272727489</u>                 | 0,538461566             | <u>-0,823964119</u>  | <u>-0,7972792387</u>  |
| <u>0,8277882934</u> | <u>0,8277882934</u> | <u>-0,7881337404</u>                 | 0,6443860531            | <u>-0,7650904655</u> | <u>-0,7863867283</u>  |
| -0,6453512907       | -0,6453512907       | <u>0,8628854156</u>                  | -0,5148307681           | <u>0,8543788195</u>  | <u>0,9079036117</u>   |
| <u>0,8846388459</u> | <u>0,8846388459</u> | <u>-0,7396160364</u>                 | <u>0,8193785548</u>     | <u>-0,7302383184</u> | <u>-0,7750396729</u>  |
| <u>0,9020978808</u> | <u>0,9020978808</u> | -0,6293706298                        | <u>0,811188817</u>      | -0,6338185072        | <u>-0,7047379017</u>  |
| <u>0,8721554279</u> | <u>0,8721554279</u> | -0,4553422034                        | 0,6690027714            | -0,5149983764        | -0,5883110166         |
| -0,0595447496       | -0,0595447496       | -0,0770579129                        | -0,1366026551           | -0,1622597724        | 0,1461863667          |
| -0,0489510484       | -0,0489510484       | -0,0769230798                        | -0,062937066            | -0,1549334228        | 0,1815233976          |
| -0,5253948569       | -0,5253948569       | 0,371279031                          | -0,3993000984           | 0,4444506764         | 0,6560559273          |
| 0,0349650346        | 0,0349650346        | 0,062937066                          | 0,1188811213            | -0,1408485621        | 0,0605078004          |
| 0,2097902149        | 0,2097902149        | -0,1118881106                        | 0,2447552383            | -0,2183152735        | 0,0818634927          |
| 0,3006992936        | 0,3006992936        | -0,167832166                         | 0,3356643319            | -0,2746546865        | -0,1032191887         |
| -0,6363636255       | -0,6363636255       | 0,377622366                          | -0,377622366            | 0,3309941292         | 0,6299929619          |
| 0,3930418193        | 0,3930418193        | -0,3930418193                        | 0,1310139447            | -0,3958195448        | -0,3556433916         |

Systemic BA versus bact taxa

| Deferribacteres_c          | Deferribacterales_o        | Deferribacteraceae_f       | Mucispirillum_g_p          | Verrucomicrobia_e_c        | Verrucomicrobia_e_c        |
|----------------------------|----------------------------|----------------------------|----------------------------|----------------------------|----------------------------|
| 0,0561194649               | 0,0561194649               | 0,0561194649               | 0,0561194649               | <b><u>0,035615756</u></b>  | <b><u>0,035615756</u></b>  |
| 0,0685126423               | 0,0685126423               | 0,0685126423               | 0,0685126423               | <b><u>0,0319608657</u></b> | <b><u>0,0319608657</u></b> |
| <b><u>0,0118611582</u></b> | <b><u>0,0118611582</u></b> | <b><u>0,0118611582</u></b> | <b><u>0,0118611582</u></b> | 0,1233206362               | 0,1233206362               |
| 0,0629035497               | 0,0629035497               | 0,0629035497               | 0,0629035497               | 0,1063819563               | 0,1063819563               |
| 0,0985145988               | 0,0985145988               | 0,0985145988               | 0,0985145988               | 0,0517626923               | 0,0517626923               |
| 0,2630234948               | 0,2630234948               | 0,2630234948               | 0,2630234948               | 0,1243863586               | 0,1243863586               |
| 0,8907874502               | 0,8907874502               | 0,8907874502               | 0,8907874502               | 0,8635708695               | 0,8635708695               |
| 0,85940153                 | 0,85940153                 | 0,85940153                 | 0,85940153                 | 0,8907874502               | 0,8907874502               |
| 0,1519388793               | 0,1519388793               | 0,1519388793               | 0,1519388793               | 0,4759122926               | 0,4759122926               |
| 0,9569983076               | 0,9569983076               | 0,9569983076               | 0,9569983076               | 0,787224508                | 0,787224508                |
| 0,9248239218               | 0,9248239218               | 0,9248239218               | 0,9248239218               | 0,6926907159               | 0,6926907159               |
| 0,9181317271               | 0,9181317271               | 0,9181317271               | 0,9181317271               | 0,4832238904               | 0,4832238904               |
| 0,1855908313               | 0,1855908313               | 0,1855908313               | 0,1855908313               | 0,1773402596               | 0,1773402596               |
| 0,6668859678               | 0,6668859678               | 0,6668859678               | 0,6668859678               | 0,6926907159               | 0,6926907159               |

| Deferribacteres_c           | Deferribacterales_o         | Deferribacteraceae_f        | Mucispirillum_g_p           | Verrucomicrobia_e_c        | Verrucomicrobia_e_c        |
|-----------------------------|-----------------------------|-----------------------------|-----------------------------|----------------------------|----------------------------|
| <b><u>-0,7972792387</u></b> | <b><u>-0,7972792387</u></b> | <b><u>-0,7972792387</u></b> | <b><u>-0,7972792387</u></b> | <b><u>0,8461538553</u></b> | <b><u>0,8461538553</u></b> |
| <b><u>-0,7863867283</u></b> | <b><u>-0,7863867283</u></b> | <b><u>-0,7863867283</u></b> | <b><u>-0,7863867283</u></b> | <b><u>0,87735641</u></b>   | <b><u>0,87735641</u></b>   |
| <b><u>0,9079036117</u></b>  | <b><u>0,9079036117</u></b>  | <b><u>0,9079036117</u></b>  | <b><u>0,9079036117</u></b>  | -0,6816069484              | -0,6816069484              |
| <b><u>-0,7750396729</u></b> | <b><u>-0,7750396729</u></b> | <b><u>-0,7750396729</u></b> | <b><u>-0,7750396729</u></b> | 0,6961092353               | 0,6961092353               |
| <b><u>-0,7047379017</u></b> | <b><u>-0,7047379017</u></b> | <b><u>-0,7047379017</u></b> | <b><u>-0,7047379017</u></b> | <b><u>0,811188817</u></b>  | <b><u>0,811188817</u></b>  |
| -0,5883110166               | -0,5883110166               | -0,5883110166               | -0,5883110166               | 0,679510653                | 0,679510653                |
| 0,1461863667                | 0,1461863667                | 0,1461863667                | 0,1461863667                | 0,175131619                | 0,175131619                |
| 0,1815233976                | 0,1815233976                | 0,1815233976                | 0,1815233976                | 0,1398601383               | 0,1398601383               |
| 0,6560559273                | 0,6560559273                | 0,6560559273                | 0,6560559273                | -0,5008764267              | -0,5008764267              |
| 0,0605078004                | 0,0605078004                | 0,0605078004                | 0,0605078004                | 0,2377622426               | 0,2377622426               |
| 0,0818634927                | 0,0818634927                | 0,0818634927                | 0,0818634927                | 0,3286713362               | 0,3286713362               |
| -0,1032191887               | -0,1032191887               | -0,1032191887               | -0,1032191887               | 0,4895104766               | 0,4895104766               |
| 0,6299929619                | 0,6299929619                | 0,6299929619                | 0,6299929619                | -0,6363636255              | -0,6363636255              |
| -0,3556433916               | -0,3556433916               | -0,3556433916               | -0,3556433916               | 0,3056991994               | 0,3056991994               |

Systemic BA versus bact taxa

| Verrucomicrobia<br>les_o | Verrucomicrobia<br>ceae_f | Akkermansia_g       | Actinobacteria_p    | Actinobacteria_c    | unclassified_Pro<br>teobacteria |
|--------------------------|---------------------------|---------------------|---------------------|---------------------|---------------------------------|
| <u>0,035615756</u>       | <u>0,035615756</u>        | <u>0,035615756</u>  | 0,1678820137        | 0,1678820137        | 0,0913305499                    |
| <u>0,0319608657</u>      | <u>0,0319608657</u>       | <u>0,0319608657</u> | 0,0629035497        | 0,0629035497        | 0,09321797                      |
| 0,1233206362             | 0,1233206362              | 0,1233206362        | <u>0,0482030397</u> | <u>0,0482030397</u> | <u>0,0211453987</u>             |
| 0,1063819563             | 0,1063819563              | 0,1063819563        | <u>0,0381779652</u> | <u>0,0381779652</u> | 0,0636959875                    |
| 0,0517626923             | 0,0517626923              | 0,0517626923        | 0,0636959875        | 0,0636959875        | 0,1855908313                    |
| 0,1243863586             | 0,1243863586              | 0,1243863586        | 0,202809118         | 0,202809118         | 0,4611299777                    |
| 0,8635708695             | 0,8635708695              | 0,8635708695        | 0,730185533         | 0,730185533         | 0,9181317271                    |
| 0,8907874502             | 0,8907874502              | 0,8907874502        | 0,7009287858        | 0,7009287858        | 0,9435004505                    |
| 0,4759122926             | 0,4759122926              | 0,4759122926        | 0,0629035497        | 0,0629035497        | 0,4842820139                    |
| 0,787224508              | 0,787224508               | 0,787224508         | 0,9894098955        | 0,9894098955        | 0,9136901126                    |
| 0,6926907159             | 0,6926907159              | 0,6926907159        | 1                   | 1                   | 0,9894098955                    |
| 0,4832238904             | 0,4832238904              | 0,4832238904        | 0,8286289824        | 0,8286289824        | 0,9435004505                    |
| 0,1773402596             | 0,1773402596              | 0,1773402596        | 0,0685126423        | 0,0685126423        | 0,5958500098                    |
| 0,6926907159             | 0,6926907159              | 0,6926907159        | 0,7911330147        | 0,7911330147        | 0,4832238904                    |

| Verrucomicrobia<br>les_o | Verrucomicrobia<br>ceae_f | Akkermansia_g       | Actinobacteria_p     | Actinobacteria_c     | unclassified_Pro<br>teobacteria |
|--------------------------|---------------------------|---------------------|----------------------|----------------------|---------------------------------|
| <u>0,8461538553</u>      | <u>0,8461538553</u>       | <u>0,8461538553</u> | 0,6433566213         | 0,6433566213         | <u>-0,7132866979</u>            |
| <u>0,87735641</u>        | <u>0,87735641</u>         | <u>0,87735641</u>   | <u>0,7980473638</u>  | <u>0,7980473638</u>  | <u>-0,7385655642</u>            |
| -0,6816069484            | -0,6816069484             | -0,6816069484       | <u>-0,8193785548</u> | <u>-0,8193785548</u> | <u>0,8846388459</u>             |
| 0,6961092353             | 0,6961092353              | 0,6961092353        | <u>0,8411319852</u>  | <u>0,8411319852</u>  | <u>-0,7686206102</u>            |
| <u>0,811188817</u>       | <u>0,811188817</u>        | <u>0,811188817</u>  | <u>0,769230783</u>   | <u>0,769230783</u>   | -0,6293706298                   |
| 0,679510653              | 0,679510653               | 0,679510653         | 0,6199659109         | 0,6199659109         | -0,5113843083                   |
| 0,175131619              | 0,175131619               | 0,175131619         | -0,2907184958        | -0,2907184958        | 0,0910684392                    |
| 0,1398601383             | 0,1398601383              | 0,1398601383        | -0,3006992936        | -0,3006992936        | 0,0699300691                    |
| -0,5008764267            | -0,5008764267             | -0,5008764267       | <u>-0,7740817666</u> | <u>-0,7740817666</u> | 0,4798606336                    |
| 0,2377622426             | 0,2377622426              | 0,2377622426        | -0,0069930069        | -0,0069930069        | 0,1118881106                    |
| 0,3286713362             | 0,3286713362              | 0,3286713362        | 0                    | 0                    | -0,0069930069                   |
| 0,4895104766             | 0,4895104766              | 0,4895104766        | 0,1958041936         | 0,1958041936         | -0,0699300691                   |
| -0,6363636255            | -0,6363636255             | -0,6363636255       | <u>-0,7622377872</u> | <u>-0,7622377872</u> | 0,4125874043                    |
| 0,3056991994             | 0,3056991994              | 0,3056991994        | 0,2183565795         | 0,2183565795         | -0,480384469                    |

Portal BA versus bact taxa

Spearman's r correlation coefficient between portal bile acid profile and significantly affected bacterial taxa.  
qvalue

|       | Firmicutes_p               | Clostridia_c               | Clostridiales_o            | Ruminococcac<br>eae_f      | Oscillibacter_g<br>g       | Flavonifractor_            |
|-------|----------------------------|----------------------------|----------------------------|----------------------------|----------------------------|----------------------------|
| CA    | <b><u>0,0388116243</u></b> | <b><u>0,0388116243</u></b> | <b><u>0,0388116243</u></b> | <b><u>0,0371656569</u></b> | 0,0530665165               | <b><u>0,0388116243</u></b> |
| CDCA  | 0,072080833                | 0,0810099616               | 0,0810099616               | 0,072080833                | <b><u>0,0478153613</u></b> | 0,0763434155               |
| DCA   | 0,1499063276               | 0,179362406                | 0,179362406                | 0,0508504734               | 0,0687639346               | <b><u>0,0388116243</u></b> |
| UDCA  | 0,2852723264               | 0,2519341776               | 0,2519341776               | 0,2852723264               | 0,1554634013               | 0,179362406                |
| aMCA  | 0,0637898127               | 0,0858454098               | 0,0858454098               | 0,0810099616               | <b><u>0,0388116243</u></b> | 0,072080833                |
| bMCA  | <b><u>0,0388116243</u></b> | <b><u>0,0388116243</u></b> | <b><u>0,0388116243</u></b> | 0,1044615019               | <b><u>0,042843699</u></b>  | 0,0884054686               |
| wMCA  | 0,061635309                | 0,0745912267               | 0,0745912267               | 0,1764488734               | 0,1424455899               | 0,3483655347               |
| TCA   | 0,9120445261               | 0,919139285                | 0,919139285                | 0,9966219319               | 0,9120445261               | 0,9446287115               |
| TCDCA | 0,9277930084               | 0,9072202438               | 0,9072202438               | 0,9120445261               | 0,8613943344               | 0,9559117222               |
| TDCA  | 0,1361531528               | 0,1453172143               | 0,1453172143               | 0,0503283058               | 0,0583295475               | <b><u>0,0371656569</u></b> |
| TUDCA | 0,3259010072               | 0,2960536713               | 0,2960536713               | 0,7563252781               | 0,6955415211               | 0,6927964955               |
| TaMCA | 0,2701695909               | 0,2117355768               | 0,2117355768               | 0,6871960678               | 0,6612194908               | 0,610711893                |
| TbMCA | 0,2657143714               | 0,2449832502               | 0,2449832502               | 0,6407403871               | 0,6107707908               | 0,5634607469               |
| TwMCA | 0,8841648323               | 0,8966611756               | 0,8966611756               | 0,7722122587               | 0,6612194908               | 0,74244204                 |
| THDCA | 0,5963552061               | 0,568578125                | 0,568578125                | 0,8648303675               | 0,9183833604               | 0,9277930084               |

r value

|       | Firmicutes_p                | Clostridia_c                | Clostridiales_o             | Ruminococcac<br>eae_f       | Oscillibacter_g<br>g        | Flavonifractor_             |
|-------|-----------------------------|-----------------------------|-----------------------------|-----------------------------|-----------------------------|-----------------------------|
| CA    | <b><u>-0,8363636136</u></b> | <b><u>-0,8363636136</u></b> | <b><u>-0,8363636136</u></b> | <b><u>-0,8545454741</u></b> | <b><u>-0,7909091115</u></b> | <b><u>-0,8348975182</u></b> |
| CDCA  | <b><u>-0,7583928704</u></b> | <b><u>-0,7385655642</u></b> | <b><u>-0,7385655642</u></b> | <b><u>-0,7583928704</u></b> | <b><u>-0,8079609871</u></b> | <b><u>-0,7453727722</u></b> |
| DCA   | 0,6674237847                | 0,6483545899                | 0,6483545899                | <b><u>0,8009085655</u></b>  | <b><u>0,7627700567</u></b>  | <b><u>0,8371579051</u></b>  |
| UDCA  | -0,579107821                | -0,6001662612               | -0,6001662612               | -0,579107821                | -0,663341701                | -0,6482030153               |
| aMCA  | <b><u>-0,7683064938</u></b> | <b><u>-0,7286519408</u></b> | <b><u>-0,7286519408</u></b> | <b><u>-0,7385655642</u></b> | <b><u>-0,8377019167</u></b> | <b><u>-0,7553777695</u></b> |
| bMCA  | <b><u>-0,8272727132</u></b> | <b><u>-0,8454545736</u></b> | <b><u>-0,8454545736</u></b> | <b><u>-0,7090908885</u></b> | <b><u>-0,8181818128</u></b> | <b><u>-0,7248011231</u></b> |
| wMCA  | <b><u>-0,8037415147</u></b> | <b><u>-0,779199779</u></b>  | <b><u>-0,779199779</u></b>  | -0,6810328364               | <b><u>-0,7055745721</u></b> | -0,5723320842               |
| TCA   | -0,1090909094               | -0,0909090936               | -0,0909090936               | 0,0181818176                | 0,1000000015                | 0,0733975843                |
| TCDCA | -0,0865605921               | -0,1184513345               | -0,1184513345               | 0,1002280489                | 0,1731211841                | 0,0597715378                |
| TDCA  | 0,6803688407                | 0,6707861423                | 0,6707861423                | <b><u>0,8049433827</u></b>  | <b><u>0,7809867263</u></b>  | <b><u>0,8558818102</u></b>  |
| TUDCA | -0,5545454621               | -0,572727263                | -0,572727263                | -0,2818181813               | -0,3454545438               | -0,3486385345               |
| TaMCA | -0,5877008438               | -0,6287032366               | -0,6287032366               | -0,3507981896               | -0,3644656241               | -0,3954117                  |
| TbMCA | -0,5909090638               | -0,6090909243               | -0,6090909243               | -0,3727272749               | -0,3909091055               | -0,4312108159               |
| TwMCA | 0,1454545408                | 0,1272727251                | 0,1272727251                | 0,2636363506                | 0,3636363745                | 0,293590337                 |
| THDCA | -0,4050813615               | -0,4264014363               | -0,4264014363               | -0,1705605686               | -0,0959403217               | -0,0860662982               |

Portal BA versus bact taxa

| Clostridium IV_g           | Pseudoflavonif ractor_g    | Butyricococcus _g          | unclassified_R uminococcace ae | Lachnospirace ae_f        | Clostridium XIVb_g         | unclassified_L achnospiracea e |
|----------------------------|----------------------------|----------------------------|--------------------------------|---------------------------|----------------------------|--------------------------------|
| 0,1807896227               | 0,2631073115               | 0,0637898127               | <b><u>0,0232402207</u></b>     | <b><u>0,042843699</u></b> | 0,0763434155               | <b><u>0,042843699</u></b>      |
| <b><u>0,0388116243</u></b> | 0,0768059345               | <b><u>0,0371656569</u></b> | 0,0858454098                   | 0,0858454098              | 0,0938062851               | 0,0858454098                   |
| 0,1286514753               | 0,2464963352               | <b><u>0,0147552288</u></b> | 0,0508504734                   | 0,0884054686              | <b><u>0,0388116243</u></b> | 0,0884054686                   |
| 0,0583295475               | 0,2069217435               | 0,0858454098               | 0,3207156618                   | 0,3207156618              | 0,3027240011               | 0,3207156618                   |
| <b><u>0,0434580251</u></b> | 0,0768059345               | <b><u>0,0371656569</u></b> | 0,0938062851                   | 0,0938062851              | 0,0858454098               | 0,0938062851                   |
| <b><u>0,0295383194</u></b> | <b><u>0,0388116243</u></b> | 0,0687639346               | 0,1437353597                   | 0,1136598597              | 0,134050222                | 0,1136598597                   |
| 0,1136598597               | 0,1044615019               | 0,3777648943               | 0,2132869731                   | 0,2668288193              | 0,3747432402               | 0,2668288193                   |
| 0,7192353435               | 0,9134909145               | 0,6424825234               | 0,9843380785                   | 0,9738861133              | 0,9511941523               | 0,9738861133                   |
| 0,6955415211               | 0,824785166                | 0,5963552061               | 0,9911986168                   | 0,9072202438              | 0,8875554043               | 0,9072202438                   |
| 0,0896335551               | 0,2421605787               | <b><u>0,0102367057</u></b> | 0,0503283058                   | 0,0769945535              | <b><u>0,0388116243</u></b> | 0,0769945535                   |
| 0,9120445261               | 0,7110561224               | 0,948331404                | 0,6407403871                   | 0,5342887472              | 0,7433394224               | 0,5342887472                   |
| 0,8809025883               | 0,604384724                | 0,8875554043               | 0,5862533899                   | 0,4272585942              | 0,6107707908               | 0,4272585942                   |
| 0,8326190912               | 0,5925136592               | 0,8911201565               | 0,5477367414                   | 0,5016629356              | 0,5868879494               | 0,5016629356                   |
| 0,6107707908               | 0,7252827388               | 0,1939501457               | 0,8105174417                   | 0,7563252781              | 0,6812194934               | 0,7563252781                   |
| 1                          | 0,8326190912               | 0,8181146831               | 0,8181146831                   | 0,8063177649              | 0,9559117222               | 0,8063177649                   |

| Clostridium IV_g            | Pseudoflavonif ractor_g     | Butyricococcus _g           | unclassified_R uminococcace ae | Lachnospirace ae_f          | Clostridium XIVb_g          | unclassified_L achnospiracea e |
|-----------------------------|-----------------------------|-----------------------------|--------------------------------|-----------------------------|-----------------------------|--------------------------------|
| -0,6454545259               | -0,5948179364               | <b><u>-0,7723047137</u></b> | <b><u>-0,8818181753</u></b>    | <b><u>-0,8181818128</u></b> | <b><u>-0,7454545498</u></b> | <b><u>-0,8181818128</u></b>    |
| <b><u>-0,8426586986</u></b> | <b><u>-0,7432432175</u></b> | <b><u>-0,8577941656</u></b> | <b><u>-0,7286519408</u></b>    | <b><u>-0,7286519408</u></b> | <b><u>-0,7187383175</u></b> | <b><u>-0,7286519408</u></b>    |
| 0,6864930391                | 0,6082540154                | <b><u>0,8999999762</u></b>  | <b><u>0,8009085655</u></b>     | <b><u>0,7246315479</u></b>  | <b><u>0,8390470743</u></b>  | <b><u>0,7246315479</u></b>     |
| <b><u>-0,7791632414</u></b> | -0,6315167546               | <b><u>-0,7288480997</u></b> | -0,5580493212                  | -0,5580493212               | -0,5685786009               | -0,5580493212                  |
| <b><u>-0,8129178286</u></b> | <b><u>-0,7432432175</u></b> | <b><u>-0,8577941656</u></b> | <b><u>-0,7187383175</u></b>    | <b><u>-0,7187383175</u></b> | <b><u>-0,7286519408</u></b> | <b><u>-0,7187383175</u></b>    |
| <b><u>-0,8727272749</u></b> | <b><u>-0,84761554</u></b>   | <b><u>-0,7627700567</u></b> | -0,6727272868                  | -0,6999999881               | -0,6818181872               | -0,6999999881                  |
| <b><u>-0,7301163077</u></b> | <b><u>-0,7395737767</u></b> | -0,5570624471               | -0,6564911604                  | -0,6196785569               | -0,5583242178               | -0,6196785569                  |
| 0,3181818128                | 0,0991363227                | 0,3718504012                | -0,0272727273                  | 0,0363636352                | 0,0636363626                | 0,0363636352                   |
| 0,3462423682                | 0,196240738                 | 0,4013675153                | -0,0227791015                  | -0,1184513345               | 0,1366746128                | -0,1184513345                  |
| <b><u>0,7234907746</u></b>  | 0,6113182902                | <b><u>0,9196096063</u></b>  | <b><u>0,8049433827</u></b>     | <b><u>0,7426561117</u></b>  | <b><u>0,8289000392</u></b>  | <b><u>0,7426561117</u></b>     |
| -0,1090909094               | -0,3370634913               | -0,0667423829               | -0,3727272749                  | -0,4454545379               | -0,2909090817               | -0,4454545379                  |
| -0,150342077                | -0,3974496126               | -0,1385673583               | -0,4191354811                  | -0,5056960583               | -0,3918005526               | -0,5056960583                  |
| -0,1909090877               | -0,4163725376               | -0,1334847659               | -0,4363636374                  | -0,4636363685               | -0,4181818068               | -0,4636363685                  |
| 0,3909091055                | 0,3023657799                | 0,6388199329                | 0,227272734                    | 0,2818181813                | 0,3545454443                | 0,2818181813                   |
| -0,0106600355               | -0,1918086112               | 0,2236067951                | -0,2132007182                  | -0,2451808304               | -0,0533001795               | -0,2451808304                  |



Portal BA versus bact taxa

| Erysipelotrichia_c         | Erysipelotrichal_es_o      | Erysipelotricha_ceae_f     | unclassified_Clostridia   | unclassified_Selenomonadales | Deltaproteobacteria_c      | Desulfovibrionales_o       |
|----------------------------|----------------------------|----------------------------|---------------------------|------------------------------|----------------------------|----------------------------|
| 0,4462277753               | 0,4462277753               | 0,4462277753               | 0,1136598597              | 0,7252827388                 | <b><u>0,0388116243</u></b> | <b><u>0,0388116243</u></b> |
| 0,0516304332               | 0,0516304332               | 0,0516304332               | 0,0858454098              | 0,544202049                  | <b><u>0,0388116243</u></b> | <b><u>0,0388116243</u></b> |
| 0,3483655347               | 0,3483655347               | 0,3483655347               | <b><u>0,042843699</u></b> | 0,9731885082                 | <b><u>0,0388116243</u></b> | <b><u>0,0388116243</u></b> |
| 0,0637898127               | 0,0637898127               | 0,0637898127               | 0,3207156618              | 0,4058075942                 | 0,1307617346               | 0,1307617346               |
| 0,0530665165               | 0,0530665165               | 0,0530665165               | 0,0938062851              | 0,5289895735                 | <b><u>0,0388116243</u></b> | <b><u>0,0388116243</u></b> |
| <b><u>0,0329793976</u></b> | <b><u>0,0329793976</u></b> | <b><u>0,0329793976</u></b> | 0,1044615019              | 0,2809248488                 | 0,1982643477               | 0,1807896227               |
| <b><u>0,0388116243</u></b> | <b><u>0,0388116243</u></b> | <b><u>0,0388116243</u></b> | 0,3267982345              | <b><u>0,0388116243</u></b>   | 0,2854890024               | 0,2854890024               |
| 0,5963552061               | 0,5963552061               | 0,5963552061               | 0,962819882               | 0,7722122587                 | 0,8063177649               | 0,8181146831               |
| 0,5960490378               | 0,5960490378               | 0,5960490378               | 0,9072202438              | 0,8105174417                 | 0,8917923954               | 0,8809025883               |
| 0,3702861125               | 0,3702861125               | 0,3702861125               | <b><u>0,042843699</u></b> | 0,9657540096                 | <b><u>0,0388116243</u></b> | <b><u>0,0388116243</u></b> |
| 0,8841648323               | 0,8841648323               | 0,8841648323               | 0,7563252781              | 0,8181146831                 | 0,8966611756               | 0,9072202438               |
| 0,8181146831               | 0,8181146831               | 0,8181146831               | 0,6107707908              | 0,8762961531                 | 0,872255743                | 0,8841648323               |
| 0,8677691557               | 0,8677691557               | 0,8677691557               | 0,5477367414              | 1                            | 0,8613943344               | 0,8326190912               |
| 0,4272585942               | 0,4272585942               | 0,4272585942               | 0,7192353435              | 0,8326190912                 | 0,6612194908               | 0,7110561224               |
| 1                          | 1                          | 1                          | 0,9120445261              | 0,8181146831                 | 0,9791643593               | 0,9791643593               |

| Erysipelotrichia_c         | Erysipelotrichal_es_o      | Erysipelotricha_ceae_f     | unclassified_Clostridia     | unclassified_Selenomonadales | Deltaproteobacteria_c       | Desulfovibrionales_o        |
|----------------------------|----------------------------|----------------------------|-----------------------------|------------------------------|-----------------------------|-----------------------------|
| 0,4909090996               | 0,4909090996               | 0,4909090996               | -0,6999999881               | -0,3090909123                | <b><u>-0,8454545736</u></b> | <b><u>-0,8363636136</u></b> |
| <b><u>0,7980473638</u></b> | <b><u>0,7980473638</u></b> | <b><u>0,7980473638</u></b> | <b><u>-0,7286519408</u></b> | -0,4411566257                | <b><u>-0,8377019167</u></b> | <b><u>-0,8377019167</u></b> |
| -0,5434736609              | -0,5434736609              | -0,5434736609              | <b><u>0,8199778199</u></b>  | -0,0381385051                | <b><u>0,8295124769</u></b>  | <b><u>0,8485817313</u></b>  |
| <b><u>0,7686340213</u></b> | <b><u>0,7686340213</u></b> | <b><u>0,7686340213</u></b> | -0,5580493212               | -0,5159324408                | -0,6844001412               | -0,6844001412               |
| <b><u>0,7881337404</u></b> | <b><u>0,7881337404</u></b> | <b><u>0,7881337404</u></b> | <b><u>-0,7187383175</u></b> | -0,4510702491                | <b><u>-0,8277882934</u></b> | <b><u>-0,8277882934</u></b> |
| <b><u>0,8636363745</u></b> | <b><u>0,8636363745</u></b> | <b><u>0,8636363745</u></b> | <b><u>-0,7090908885</u></b> | -0,5818181634                | -0,6363636255               | -0,6454545259               |
| <b><u>0,8650957942</u></b> | <b><u>0,8650957942</u></b> | <b><u>0,8650957942</u></b> | -0,5828659534               | <b><u>-0,8650957942</u></b>  | -0,6074076891               | -0,6074076891               |
| -0,4000000006              | -0,4000000006              | -0,4000000006              | 0,0454545468                | 0,2636363506                 | 0,2454545498                | 0,2181818187                |
| -0,4145796597              | -0,4145796597              | -0,4145796597              | 0,1184513345                | 0,2277910262                 | 0,1321187913                | 0,150342077                 |
| -0,5318375826              | -0,5318375826              | -0,5318375826              | <b><u>0,8145260811</u></b>  | -0,0431219675                | <b><u>0,8289000392</u></b>  | <b><u>0,8480653763</u></b>  |
| 0,1454545408               | 0,1454545408               | 0,1454545408               | -0,2818181813               | -0,2090909034                | -0,1272727251               | -0,1181818172               |
| 0,2004560977               | 0,2004560977               | 0,2004560977               | -0,3872447312               | -0,1548978984                | -0,1594537199               | -0,1457862556               |
| 0,1636363566               | 0,1636363566               | 0,1636363566               | -0,4363636374               | -0,0090909088                | -0,1727272719               | -0,1909090877               |
| -0,5                       | -0,5                       | -0,5                       | 0,3181818128                | 0,1909090877                 | 0,3636363745                | 0,3363636434                |
| 0,0106600355               | 0,0106600355               | 0,0106600355               | -0,1066003591               | -0,2132007182                | -0,0319801085               | -0,0319801085               |

Portal BA versus bact taxa

| unclassified_D<br>esulfovibrional<br>es | Betaproteobact<br>eria_c   | Burkholderiale<br>s_o      | Sutterellaceae<br>_f       | Parasutterella_<br>g       | Oxalobacterac<br>eae_f     | unclassified_O<br>xalobacteracea<br>e |
|-----------------------------------------|----------------------------|----------------------------|----------------------------|----------------------------|----------------------------|---------------------------------------|
| <b><u>0,0388116243</u></b>              | 0,1807896227               | 0,1807896227               | 0,0865651764               | 0,0865651764               | 0,0583295475               | 0,0583295475                          |
| <b><u>0,0388116243</u></b>              | <b><u>0,0127886769</u></b> | <b><u>0,0127886769</u></b> | <b><u>0,0127886769</u></b> | <b><u>0,0127886769</u></b> | <b><u>0,0388116243</u></b> | <b><u>0,0388116243</u></b>            |
| <b><u>0,0388116243</u></b>              | 0,0829645315               | 0,0829645315               | 0,164091325                | 0,164091325                | 0,0858454098               | 0,0858454098                          |
| 0,1307617346                            | 0,0583295475               | 0,0583295475               | 0,0583295475               | 0,0583295475               | 0,2745009462               | 0,2745009462                          |
| <b><u>0,0388116243</u></b>              | <b><u>0,0147552288</u></b> | <b><u>0,0147552288</u></b> | <b><u>0,0147552288</u></b> | <b><u>0,0147552288</u></b> | <b><u>0,0388116243</u></b> | <b><u>0,0388116243</u></b>            |
| 0,1807896227                            | <b><u>0,0127886769</u></b> | <b><u>0,0127886769</u></b> | <b><u>0,0076061555</u></b> | <b><u>0,0076061555</u></b> | 0,2068586112               | 0,2068586112                          |
| 0,2854890024                            | 0,0508504734               | 0,0508504734               | <b><u>0,0076061555</u></b> | <b><u>0,0076061555</u></b> | 0,1658284261               | 0,1658284261                          |
| 0,8181146831                            | 0,6612194908               | 0,6612194908               | 0,7563252781               | 0,7563252781               | 0,8181146831               | 0,8181146831                          |
| 0,8809025883                            | 0,5289895735               | 0,5289895735               | 0,7192353435               | 0,7192353435               | 0,8327449247               | 0,8327449247                          |
| <b><u>0,0388116243</u></b>              | 0,0763434155               | 0,0763434155               | 0,1453172143               | 0,1453172143               | 0,0838165572               | 0,0838165572                          |
| 0,9072202438                            | 0,9120445261               | 0,9120445261               | 0,8063177649               | 0,8063177649               | 0,8966611756               | 0,8966611756                          |
| 0,8841648323                            | 0,8917923954               | 0,8917923954               | 0,8066845728               | 0,8066845728               | 0,9120445261               | 0,9120445261                          |
| 0,8326190912                            | 0,8762961531               | 0,8762961531               | 0,8105174417               | 0,8105174417               | 0,9120445261               | 0,9120445261                          |
| 0,7110561224                            | 0,2960536713               | 0,2960536713               | 0,4949439607               | 0,4949439607               | 0,5289895735               | 0,5289895735                          |
| 0,9791643593                            | 0,9511941523               | 0,9511941523               | 0,9120445261               | 0,9120445261               | 1                          | 1                                     |

| unclassified_D<br>esulfovibrional<br>es | Betaproteobact<br>eria_c    | Burkholderiale<br>s_o       | Sutterellaceae<br>_f       | Parasutterella_<br>g       | Oxalobacterac<br>eae_f      | unclassified_O<br>xalobacteracea<br>e |
|-----------------------------------------|-----------------------------|-----------------------------|----------------------------|----------------------------|-----------------------------|---------------------------------------|
| <b><u>-0,8363636136</u></b>             | 0,6454545259                | 0,6454545259                | <b><u>0,7272727489</u></b> | <b><u>0,7272727489</u></b> | <b><u>0,7791632414</u></b>  | <b><u>0,7791632414</u></b>            |
| <b><u>-0,8377019167</u></b>             | <b><u>0,9070973396</u></b>  | <b><u>0,9070973396</u></b>  | <b><u>0,9070973396</u></b> | <b><u>0,9070973396</u></b> | <b><u>0,8267129064</u></b>  | <b><u>0,8267129064</u></b>            |
| <b><u>0,8485817313</u></b>              | <b><u>-0,7341662049</u></b> | <b><u>-0,7341662049</u></b> | -0,6578891873              | -0,6578891873              | <b><u>-0,7288480997</u></b> | <b><u>-0,7288480997</u></b>           |
| -0,6844001412                           | <b><u>0,7791632414</u></b>  | <b><u>0,7791632414</u></b>  | <b><u>0,7791632414</u></b> | <b><u>0,7791632414</u></b> | 0,5853658319                | 0,5853658319                          |
| <b><u>-0,8277882934</u></b>             | <b><u>0,8971837163</u></b>  | <b><u>0,8971837163</u></b>  | <b><u>0,8971837163</u></b> | <b><u>0,8971837163</u></b> | <b><u>0,8381950259</u></b>  | <b><u>0,8381950259</u></b>            |
| -0,6454545259                           | <b><u>0,9090909362</u></b>  | <b><u>0,9090909362</u></b>  | <b><u>0,9363636374</u></b> | <b><u>0,9363636374</u></b> | 0,6317539811                | 0,6317539811                          |
| -0,6074076891                           | <b><u>0,8282831907</u></b>  | <b><u>0,8282831907</u></b>  | <b><u>0,9509918094</u></b> | <b><u>0,9509918094</u></b> | 0,6869342923                | 0,6869342923                          |
| 0,2181818187                            | -0,3636363745               | -0,3636363745               | -0,2818181813              | -0,2818181813              | -0,2211138904               | -0,2211138904                         |
| 0,150342077                             | -0,4510262311               | -0,4510262311               | -0,3189074397              | -0,3189074397              | -0,1899584085               | -0,1899584085                         |
| <b><u>0,8480653763</u></b>              | <b><u>-0,7474474311</u></b> | <b><u>-0,7474474311</u></b> | -0,6707861423              | -0,6707861423              | <b><u>-0,732519865</u></b>  | <b><u>-0,732519865</u></b>            |
| -0,1181818172                           | 0,1090909094                | 0,1090909094                | 0,2454545498               | 0,2454545498               | 0,1263507903                | 0,1263507903                          |
| -0,1457862556                           | 0,1321187913                | 0,1321187913                | 0,2414584905               | 0,2414584905               | 0,105532445                 | 0,105532445                           |
| -0,1909090877                           | 0,1545454562                | 0,1545454562                | 0,227272734                | 0,227272734                | 0,1052923277                | 0,1052923277                          |
| 0,3363636434                            | -0,572727263                | -0,572727263                | -0,4727272689              | -0,4727272689              | -0,4527570009               | -0,4527570009                         |
| -0,0319801085                           | -0,0639602169               | -0,0639602169               | 0,1066003591               | 0,1066003591               | 0,0123466197                | 0,0123466197                          |

Portal BA versus bact taxa

| Gammaproteo<br>bacteria_c  | Enterobacterial<br>es_o    | Enterobacteria<br>ceae_f   | Escherichia/Sh<br>igella_g | unclassified_D<br>eltaproteobact<br>eria | Bacteroidetes_<br>p        | Bacteroidia_c              |
|----------------------------|----------------------------|----------------------------|----------------------------|------------------------------------------|----------------------------|----------------------------|
| 0,7110561224               | 0,7433394224               | 0,7433394224               | 0,8181146831               | <b><u>0,0371656569</u></b>               | <b><u>0,0371656569</u></b> | <b><u>0,0371656569</u></b> |
| 0,9120445261               | 0,9120445261               | 0,9120445261               | 0,8181146831               | <b><u>0,0388116243</u></b>               | 0,0829645315               | 0,0829645315               |
| 0,9623930119               | 0,948331404                | 0,948331404                | 0,9731885082               | <b><u>0,0388116243</u></b>               | 0,2961726805               | 0,2961726805               |
| 0,8875554043               | 0,8875554043               | 0,8875554043               | 0,7563252781               | 0,1206214403                             | 0,3027240011               | 0,3027240011               |
| 0,92897343                 | 0,92897343                 | 0,92897343                 | 0,8305576853               | <b><u>0,0388116243</u></b>               | 0,0720908955               | 0,0720908955               |
| 0,8762961531               | 0,8677691557               | 0,8677691557               | 0,9559117222               | 0,1807896227                             | 0,0508504734               | 0,0508504734               |
| 0,8917923954               | 0,9155800214               | 0,9155800214               | 0,8181146831               | 0,3068833487                             | 0,0687639346               | 0,0687639346               |
| 0,1554634013               | 0,0865651764               | 0,0865651764               | <b><u>0,0388116243</u></b> | 0,8105174417                             | 0,9120445261               | 0,9120445261               |
| 0,0937197636               | 0,0937197636               | 0,0937197636               | 0,0508504734               | 0,9120445261                             | 0,8841648323               | 0,8841648323               |
| 0,9337977933               | 0,9277930084               | 0,9277930084               | 1                          | <b><u>0,0388116243</u></b>               | 0,2632990088               | 0,2632990088               |
| 0,0530665165               | 0,0530665165               | 0,0530665165               | 0,0530665165               | 0,8469751387                             | 0,2657143714               | 0,2657143714               |
| <b><u>0,0394303666</u></b> | <b><u>0,0394303666</u></b> | <b><u>0,0394303666</u></b> | 0,0508504734               | 0,8181146831                             | 0,2785796604               | 0,2785796604               |
| <b><u>0,042843699</u></b>  | <b><u>0,0232402207</u></b> | <b><u>0,0232402207</u></b> | <b><u>0,0232402207</u></b> | 0,8181146831                             | 0,3259010072               | 0,3259010072               |
| 0,4272585942               | 0,2657143714               | 0,2657143714               | 0,1233924333               | 0,6812194934                             | 0,9120445261               | 0,9120445261               |
| 0,1768937262               | 0,1114295356               | 0,1114295356               | 0,072080833                | 0,9791643593                             | 0,5289895735               | 0,5289895735               |

| Gammaproteo<br>bacteria_c  | Enterobacterial<br>es_o    | Enterobacteria<br>ceae_f   | Escherichia/Sh<br>igella_g | unclassified_D<br>eltaproteobact<br>eria | Bacteroidetes_<br>p        | Bacteroidia_c              |
|----------------------------|----------------------------|----------------------------|----------------------------|------------------------------------------|----------------------------|----------------------------|
| 0,3363636434               | 0,2909090817               | 0,2909090817               | 0,200000003                | <b><u>-0,8545454741</u></b>              | <b><u>0,8545454741</u></b> | <b><u>0,8545454741</u></b> |
| -0,1040931344              | -0,1040931344              | -0,1040931344              | -0,2131430805              | <b><u>-0,8277882934</u></b>              | <b><u>0,7336087823</u></b> | <b><u>0,7336087823</u></b> |
| -0,0476731285              | -0,0667423829              | -0,0667423829              | 0,0381385051               | <b><u>0,8295124769</u></b>               | -0,5720775723              | -0,5720775723              |
| -0,1368800253              | -0,1368800253              | -0,1368800253              | -0,2842893004              | -0,6949293613                            | 0,5685786009               | 0,5685786009               |
| -0,0842658728              | -0,0842658728              | -0,0842658728              | -0,1933158189              | <b><u>-0,8377019167</u></b>              | <b><u>0,753436029</u></b>  | <b><u>0,753436029</u></b>  |
| 0,1545454562               | 0,1636363566               | 0,1636363566               | 0,0545454547               | -0,6454545259                            | <b><u>0,8000000119</u></b> | <b><u>0,8000000119</u></b> |
| -0,1411149204              | -0,1043023318              | -0,1043023318              | -0,2147400975              | -0,5951368213                            | <b><u>0,7914706469</u></b> | <b><u>0,7914706469</u></b> |
| 0,6636363864               | <b><u>0,7272727489</u></b> | <b><u>0,7272727489</u></b> | <b><u>0,8363636136</u></b> | 0,227272734                              | 0,1090909094               | 0,1090909094               |
| <b><u>0,719819665</u></b>  | <b><u>0,719819665</u></b>  | <b><u>0,719819665</u></b>  | <b><u>0,8018243909</u></b> | 0,1138955131                             | 0,1457862556               | 0,1457862556               |
| -0,0814526081              | -0,0862439349              | -0,0862439349              | 0,0143739898               | <b><u>0,8289000392</u></b>               | -0,5941249132              | -0,5941249132              |
| <b><u>0,7909091115</u></b> | <b><u>0,7909091115</u></b> | <b><u>0,7909091115</u></b> | <b><u>0,7909091115</u></b> | -0,1818181872                            | 0,5909090638               | 0,5909090638               |
| <b><u>0,824603498</u></b>  | <b><u>0,824603498</u></b>  | <b><u>0,824603498</u></b>  | <b><u>0,8018243909</u></b> | -0,2050119191                            | 0,5831450224               | 0,5831450224               |
| <b><u>0,8181818128</u></b> | <b><u>0,8818181753</u></b> | <b><u>0,8818181753</u></b> | <b><u>0,8818181753</u></b> | -0,2181818187                            | 0,5545454621               | 0,5545454621               |
| 0,5                        | 0,5909090638               | 0,5909090638               | 0,6909090877               | 0,3545454443                             | -0,1090909094              | -0,1090909094              |
| 0,650262177                | <b><u>0,7035623789</u></b> | <b><u>0,7035623789</u></b> | <b><u>0,7568625212</u></b> | -0,0319801085                            | 0,4477215111               | 0,4477215111               |

Portal BA versus bact taxa

| Bacteroidales_o            | Porphyromonadaceae_f       | Parabacteroides_g          | Barnesiella_g              | Bacteroidacea_e_f          | Bacteroides_g              | unclassified_Firmicutes    |
|----------------------------|----------------------------|----------------------------|----------------------------|----------------------------|----------------------------|----------------------------|
| <b><u>0,0371656569</u></b> | 0,309452146                | 0,4001750325               | <b><u>0,0298902235</u></b> | 0,8762961531               | 0,8762961531               | 0,9120445261               |
| 0,0829645315               | 0,0508504734               | 0,0508504734               | 0,0882710079               | 0,580579754                | 0,580579754                | 0,5963552061               |
| 0,2961726805               | 0,4849863661               | 0,4597660066               | <b><u>0,0388116243</u></b> | 0,7869733546               | 0,7869733546               | 0,7688330334               |
| 0,3027240011               | <b><u>0,0388116243</u></b> | <b><u>0,0388116243</u></b> | 0,2657143714               | 0,3606526667               | 0,3606526667               | 0,3207156618               |
| 0,0720908955               | <b><u>0,0434580251</u></b> | <b><u>0,0434580251</u></b> | 0,0821811957               | 0,5963552061               | 0,5963552061               | 0,6107707908               |
| 0,0508504734               | <b><u>0,0147552288</u></b> | <b><u>0,0127886769</u></b> | 0,2490317264               | 0,8063177649               | 0,8063177649               | 0,7192353435               |
| 0,0687639346               | <b><u>0,0102367057</u></b> | <b><u>0,0169262554</u></b> | 0,2854890024               | 0,6107707908               | 0,6107707908               | 0,6612194908               |
| 0,9120445261               | 0,6812194934               | 0,6612194908               | 0,9791643593               | <b><u>0,0147552288</u></b> | <b><u>0,0147552288</u></b> | 0,0508504734               |
| 0,8841648323               | 0,6107707908               | 0,5963552061               | 1                          | <b><u>0,0298902235</u></b> | <b><u>0,0298902235</u></b> | <b><u>0,0394303666</u></b> |
| 0,2632990088               | 0,442419958                | 0,4272585942               | <b><u>0,0388116243</u></b> | 0,8066845728               | 0,8066845728               | 0,7563252781               |
| 0,2657143714               | 0,8469751387               | 0,8677691557               | 0,7192353435               | 0,1233924333               | 0,1233924333               | 0,2809248488               |
| 0,2785796604               | 0,8677691557               | 0,8762961531               | 0,6226082749               | 0,1232388971               | 0,1232388971               | 0,2238015059               |
| 0,3259010072               | 0,8677691557               | 0,8613943344               | 0,5963552061               | 0,134050222                | 0,134050222                | 0,309452146                |
| 0,9120445261               | 0,6955415211               | 0,6812194934               | 0,8066845728               | 0,072080833                | 0,072080833                | 0,1554634013               |
| 0,5289895735               | 0,9446287115               | 0,9559117222               | 0,8875554043               | 0,072080833                | 0,072080833                | 0,09833192                 |

| Bacteroidales_o            | Porphyromonadaceae_f       | Parabacteroides_g          | Barnesiella_g               | Bacteroidacea_e_f          | Bacteroides_g              | unclassified_Firmicutes     |
|----------------------------|----------------------------|----------------------------|-----------------------------|----------------------------|----------------------------|-----------------------------|
| <b><u>0,8545454741</u></b> | 0,5636363626               | 0,5181818008               | <b><u>-0,8701617122</u></b> | 0,1545454562               | 0,1545454562               | -0,1090909094               |
| <b><u>0,7336087823</u></b> | <b><u>0,8030042052</u></b> | <b><u>0,8030042052</u></b> | <b><u>-0,7253454924</u></b> | -0,4213293493              | -0,4213293493              | 0,4015021026                |
| -0,5720775723              | -0,4767313004              | -0,4862659276              | <b><u>0,8505169153</u></b>  | 0,2574349046               | 0,2574349046               | -0,2669695318               |
| 0,5685786009               | <b><u>0,8318094015</u></b> | <b><u>0,8318094015</u></b> | -0,5909817219               | -0,536990881               | -0,536990881               | 0,5580493212                |
| <b><u>0,753436029</u></b>  | <b><u>0,8129178286</u></b> | <b><u>0,8129178286</u></b> | <b><u>-0,7352817655</u></b> | -0,4015021026              | -0,4015021026              | 0,3915884495                |
| <b><u>0,8000000119</u></b> | <b><u>0,8999999762</u></b> | <b><u>0,9090909362</u></b> | -0,6059241295               | -0,2454545498              | -0,2454545498              | 0,3181818128                |
| <b><u>0,7914706469</u></b> | <b><u>0,9387210011</u></b> | <b><u>0,9141792655</u></b> | -0,6074076891               | -0,4110738933              | -0,4110738933              | 0,3865321577                |
| 0,1090909094               | -0,3545454443              | -0,3636363745              | 0,0318907425                | <b><u>0,8999999762</u></b> | <b><u>0,8999999762</u></b> | <b><u>-0,8000000119</u></b> |
| 0,1457862556               | -0,3872447312              | -0,4100238383              | 0,006849315                 | <b><u>0,8701617122</u></b> | <b><u>0,8701617122</u></b> | <b><u>-0,824603498</u></b>  |
| -0,5941249132              | -0,493506968               | -0,5030896068              | <b><u>0,8307903409</u></b>  | 0,2443578243               | 0,2443578243               | -0,2826884687               |
| 0,5909090638               | 0,1818181872               | 0,1636363566               | -0,3189074397               | 0,6909090877               | 0,6909090877               | -0,5818181634               |
| 0,5831450224               | 0,1640095413               | 0,1548978984               | -0,383561641                | 0,6924847364               | 0,6924847364               | -0,6195915937               |
| 0,5545454621               | 0,1636363566               | 0,1727272719               | -0,4054680169               | 0,6818181872               | 0,6818181872               | -0,5636363626               |
| -0,1090909094              | -0,3454545438              | -0,3545454443              | 0,2414584905                | <b><u>0,7545454502</u></b> | <b><u>0,7545454502</u></b> | -0,6636363864               |
| 0,4477215111               | 0,0746202543               | 0,0533001795               | -0,1388964951               | <b><u>0,7568625212</u></b> | <b><u>0,7568625212</u></b> | <b><u>-0,7142223716</u></b> |

Portal BA versus bact taxa

| Deferribacteres_p          | Deferribacteres_c          | Deferribacteres_o          | Deferribacteres_f          | Mucispirillum_g            | Actinobacteria_p           | Actinobacteria_c           |
|----------------------------|----------------------------|----------------------------|----------------------------|----------------------------|----------------------------|----------------------------|
| 0,0966697909               | 0,0966697909               | 0,0966697909               | 0,0966697909               | 0,0966697909               | 0,3259010072               | 0,3259010072               |
| 0,0545445453               | 0,0545445453               | 0,0545445453               | 0,0545445453               | 0,0545445453               | <b><u>0,0311925614</u></b> | <b><u>0,0311925614</u></b> |
| <b><u>0,0076061555</u></b> | <b><u>0,0076061555</u></b> | <b><u>0,0076061555</u></b> | <b><u>0,0076061555</u></b> | <b><u>0,0076061555</u></b> | 0,0530665165               | 0,0530665165               |
| 0,1233924333               | 0,1233924333               | 0,1233924333               | 0,1233924333               | 0,1233924333               | <b><u>0,0419579376</u></b> | <b><u>0,0419579376</u></b> |
| <b><u>0,042843699</u></b>  | <b><u>0,042843699</u></b>  | <b><u>0,042843699</u></b>  | <b><u>0,042843699</u></b>  | <b><u>0,042843699</u></b>  | <b><u>0,0258391588</u></b> | <b><u>0,0258391588</u></b> |
| 0,2146432008               | 0,2146432008               | 0,2146432008               | 0,2146432008               | 0,2146432008               | <b><u>0,0388116243</u></b> | <b><u>0,0388116243</u></b> |
| 0,5016629356               | 0,5016629356               | 0,5016629356               | 0,5016629356               | 0,5016629356               | 0,2519341776               | 0,2519341776               |
| 0,6762823124               | 0,6762823124               | 0,6762823124               | 0,6762823124               | 0,6762823124               | 0,4462277753               | 0,4462277753               |
| 0,7110561224               | 0,7110561224               | 0,7110561224               | 0,7110561224               | 0,7110561224               | 0,5429613302               | 0,5429613302               |
| <b><u>0,0102367057</u></b> | <b><u>0,0102367057</u></b> | <b><u>0,0102367057</u></b> | <b><u>0,0102367057</u></b> | <b><u>0,0102367057</u></b> | 0,0530665165               | 0,0530665165               |
| 0,9446287115               | 0,9446287115               | 0,9446287115               | 0,9446287115               | 0,9446287115               | 0,9446747578               | 0,9446747578               |
| 0,8841648323               | 0,8841648323               | 0,8841648323               | 0,8841648323               | 0,8841648323               | 0,886996633                | 0,886996633                |
| 0,8677691557               | 0,8677691557               | 0,8677691557               | 0,8677691557               | 0,8677691557               | 0,8762961531               | 0,8762961531               |
| 0,2490317264               | 0,2490317264               | 0,2490317264               | 0,2490317264               | 0,2490317264               | 0,1807896227               | 0,1807896227               |
| 0,7633779436               | 0,7633779436               | 0,7633779436               | 0,7633779436               | 0,7633779436               | 0,8181146831               | 0,8181146831               |

| Deferribacteres_p           | Deferribacteres_c           | Deferribacteres_o           | Deferribacteres_f           | Mucispirillum_g             | Actinobacteria_p            | Actinobacteria_c            |
|-----------------------------|-----------------------------|-----------------------------|-----------------------------|-----------------------------|-----------------------------|-----------------------------|
| <b><u>-0,7156264186</u></b> | <b><u>-0,7156264186</u></b> | <b><u>-0,7156264186</u></b> | <b><u>-0,7156264186</u></b> | <b><u>-0,7156264186</u></b> | 0,5545454621                | 0,5545454621                |
| <b><u>-0,7853928208</u></b> | <b><u>-0,7853928208</u></b> | <b><u>-0,7853928208</u></b> | <b><u>-0,7853928208</u></b> | <b><u>-0,7853928208</u></b> | <b><u>0,8674427867</u></b>  | <b><u>0,8674427867</u></b>  |
| <b><u>0,9333829284</u></b>  | <b><u>0,9333829284</u></b>  | <b><u>0,9333829284</u></b>  | <b><u>0,9333829284</u></b>  | <b><u>0,9333829284</u></b>  | <b><u>-0,7913739681</u></b> | <b><u>-0,7913739681</u></b> |
| -0,6907081008               | -0,6907081008               | -0,6907081008               | -0,6907081008               | -0,6907081008               | <b><u>0,8212801814</u></b>  | <b><u>0,8212801814</u></b>  |
| <b><u>-0,8154078126</u></b> | <b><u>-0,8154078126</u></b> | <b><u>-0,8154078126</u></b> | <b><u>-0,8154078126</u></b> | <b><u>-0,8154078126</u></b> | <b><u>0,87735641</u></b>    | <b><u>0,87735641</u></b>    |
| -0,6238794923               | -0,6238794923               | -0,6238794923               | -0,6238794923               | -0,6238794923               | <b><u>0,8363636136</u></b>  | <b><u>0,8363636136</u></b>  |
| -0,4923286736               | -0,4923286736               | -0,4923286736               | -0,4923286736               | -0,4923286736               | 0,6319494247                | 0,6319494247                |
| 0,3578132093                | 0,3578132093                | 0,3578132093                | 0,3578132093                | 0,3578132093                | -0,4909090996               | -0,4909090996               |
| 0,3356401622                | 0,3356401622                | 0,3356401622                | 0,3356401622                | 0,3356401622                | -0,4419145882               | -0,4419145882               |
| <b><u>0,9187431931</u></b>  | <b><u>0,9187431931</u></b>  | <b><u>0,9187431931</u></b>  | <b><u>0,9187431931</u></b>  | <b><u>0,9187431931</u></b>  | <b><u>-0,795360744</u></b>  | <b><u>-0,795360744</u></b>  |
| -0,0733975843               | -0,0733975843               | -0,0733975843               | -0,0733975843               | -0,0733975843               | 0,0727272704                | 0,0727272704                |
| -0,147129938                | -0,147129938                | -0,147129938                | -0,147129938                | -0,147129938                | 0,1412304342                | 0,1412304342                |
| -0,1651445627               | -0,1651445627               | -0,1651445627               | -0,1651445627               | -0,1651445627               | 0,1545454562                | 0,1545454562                |
| 0,6055300832                | 0,6055300832                | 0,6055300832                | 0,6055300832                | 0,6055300832                | -0,6454545259               | -0,6454545259               |
| 0,2689571679                | 0,2689571679                | 0,2689571679                | 0,2689571679                | 0,2689571679                | -0,2132007182               | -0,2132007182               |

Portal BA versus bact taxa

| Coriobacterida<br>e_s      | Coriobacteriale<br>s_o     | Coriobacterine<br>ae_s     | Coriobacteriac<br>eae_f    | unclassified_C<br>oriobacteriaceae | unclassified_Pr<br>oteobacteria | unclassified_B<br>acteria |
|----------------------------|----------------------------|----------------------------|----------------------------|------------------------------------|---------------------------------|---------------------------|
| 0,2519341776               | 0,2519341776               | 0,2519341776               | 0,2519341776               | 0,2519341776                       | <b><u>0,042843699</u></b>       | <b><u>0,046981462</u></b> |
| 0,0530665165               | 0,0530665165               | 0,0530665165               | 0,0530665165               | 0,0530665165                       | <b><u>0,0388116243</u></b>      | 0,072080833               |
| <b><u>0,0388116243</u></b> | <b><u>0,0388116243</u></b> | <b><u>0,0388116243</u></b> | <b><u>0,0388116243</u></b> | <b><u>0,0388116243</u></b>         | <b><u>0,0388116243</u></b>      | 0,0530665165              |
| 0,1424455899               | 0,1424455899               | 0,1424455899               | 0,1424455899               | 0,1424455899                       | 0,0530665165                    | 0,2852723264              |
| 0,0637898127               | 0,0637898127               | 0,0637898127               | 0,0637898127               | 0,0637898127                       | <b><u>0,0388116243</u></b>      | 0,0637898127              |
| 0,072080833                | 0,072080833                | 0,072080833                | 0,072080833                | 0,072080833                        | 0,1136598597                    | 0,1437353597              |
| 0,2132869731               | 0,2132869731               | 0,2132869731               | 0,2132869731               | 0,2132869731                       | 0,3512534738                    | 0,3068833487              |
| 0,7886533237               | 0,7886533237               | 0,7886533237               | 0,7886533237               | 0,7886533237                       | 0,7252827388                    | 0,8875554043              |
| 0,7192353435               | 0,7192353435               | 0,7192353435               | 0,7192353435               | 0,7192353435                       | 0,8469751387                    | 0,9046014545              |
| <b><u>0,042843699</u></b>  | <b><u>0,042843699</u></b>  | <b><u>0,042843699</u></b>  | <b><u>0,042843699</u></b>  | <b><u>0,042843699</u></b>          | <b><u>0,0388116243</u></b>      | 0,0530665165              |
| 0,9072202438               | 0,9072202438               | 0,9072202438               | 0,9072202438               | 0,9072202438                       | 0,8469751387                    | 0,757906024               |
| 0,8105174417               | 0,8105174417               | 0,8105174417               | 0,8105174417               | 0,8105174417                       | 0,8181146831                    | 0,6734984822              |
| 0,7563252781               | 0,7563252781               | 0,7563252781               | 0,7563252781               | 0,7563252781                       | 0,8066845728                    | 0,7192353435              |
| 0,5016629356               | 0,5016629356               | 0,5016629356               | 0,5016629356               | 0,5016629356                       | 0,6612194908                    | 0,5868879494              |
| 0,9559117222               | 0,9559117222               | 0,9559117222               | 0,9559117222               | 0,9559117222                       | 0,9941281637                    | 0,9559117222              |

| Coriobacterida<br>e_s       | Coriobacteriale<br>s_o      | Coriobacterine<br>ae_s      | Coriobacteriac<br>eae_f     | unclassified_C<br>oriobacteriaceae | unclassified_Pr<br>oteobacteria | unclassified_B<br>acteria   |
|-----------------------------|-----------------------------|-----------------------------|-----------------------------|------------------------------------|---------------------------------|-----------------------------|
| 0,6000000238                | 0,6000000238                | 0,6000000238                | 0,6000000238                | 0,6000000238                       | <b><u>-0,8181818128</u></b>     | <b><u>-0,8090909123</u></b> |
| <b><u>0,7881337404</u></b>  | <b><u>0,7881337404</u></b>  | <b><u>0,7881337404</u></b>  | <b><u>0,7881337404</u></b>  | <b><u>0,7881337404</u></b>         | <b><u>-0,8277882934</u></b>     | <b><u>-0,7583928704</u></b> |
| <b><u>-0,8295124769</u></b> | <b><u>-0,8295124769</u></b> | <b><u>-0,8295124769</u></b> | <b><u>-0,8295124769</u></b> | <b><u>-0,8295124769</u></b>        | <b><u>0,8295124769</u></b>      | <b><u>0,7913739681</u></b>  |
| 0,6738709211                | 0,6738709211                | 0,6738709211                | 0,6738709211                | 0,6738709211                       | <b><u>-0,7896924615</u></b>     | -0,579107821                |
| <b><u>0,7683064938</u></b>  | <b><u>0,7683064938</u></b>  | <b><u>0,7683064938</u></b>  | <b><u>0,7683064938</u></b>  | <b><u>0,7683064938</u></b>         | <b><u>-0,84761554</u></b>       | <b><u>-0,7683064938</u></b> |
| <b><u>0,7545454502</u></b>  | <b><u>0,7545454502</u></b>  | <b><u>0,7545454502</u></b>  | <b><u>0,7545454502</u></b>  | <b><u>0,7545454502</u></b>         | -0,6999999881                   | -0,6727272868               |
| 0,6564911604                | 0,6564911604                | 0,6564911604                | 0,6564911604                | 0,6564911604                       | -0,5705950856                   | -0,5951368213               |
| -0,2545454502               | -0,2545454502               | -0,2545454502               | -0,2545454502               | -0,2545454502                      | 0,3000000119                    | 0,1363636404                |
| -0,3234632611               | -0,3234632611               | -0,3234632611               | -0,3234632611               | -0,3234632611                      | 0,182232812                     | 0,123007156                 |
| <b><u>-0,8145260811</u></b> | <b><u>-0,8145260811</u></b> | <b><u>-0,8145260811</u></b> | <b><u>-0,8145260811</u></b> | <b><u>-0,8145260811</u></b>        | <b><u>0,8289000392</u></b>      | <b><u>0,7905694246</u></b>  |
| 0,1181818172                | 0,1181818172                | 0,1181818172                | 0,1181818172                | 0,1181818172                       | -0,1818181872                   | -0,2727272809               |
| 0,2277910262                | 0,2277910262                | 0,2277910262                | 0,2277910262                | 0,2277910262                       | -0,2232352048                   | -0,3599098325               |
| 0,2818181813                | 0,2818181813                | 0,2818181813                | 0,2818181813                | 0,2818181813                       | -0,2363636345                   | -0,3181818128               |
| -0,4636363685               | -0,4636363685               | -0,4636363685               | -0,4636363685               | -0,4636363685                      | 0,3636363745                    | 0,4181818068                |
| -0,0533001795               | -0,0533001795               | -0,0533001795               | -0,0533001795               | -0,0533001795                      | 0,0213200711                    | -0,0533001795               |

Caecal BA versus bact taxa

Spearman's r correlation coefficient between caecal bile acid profile and significantly affected bacterial taxa.  
qvalue

|       | Firmicutes_p               | Clostridia_c               | Clostridiales_o            | Ruminococcac<br>eae_f      | Oscillibacter_g<br>g       | Flavonifractor_            |
|-------|----------------------------|----------------------------|----------------------------|----------------------------|----------------------------|----------------------------|
| CA    | <b><u>0,0247018378</u></b> | <b><u>0,0210288743</u></b> | <b><u>0,0210288743</u></b> | <b><u>0,0210288743</u></b> | <b><u>0,0268621264</u></b> | <b><u>0,0214105306</u></b> |
| CDCA  | 0,0804990372               | <b><u>0,0210288743</u></b> | <b><u>0,0210288743</u></b> | 0,1463240941               | 0,1745616427               | 0,0574272453               |
| DCA   | 0,0706627549               | 0,0625487454               | 0,0625487454               | <b><u>0,0210288743</u></b> | <b><u>0,03706381</u></b>   | <b><u>0,0210288743</u></b> |
| LCA   | 0,0900320161               | 0,0676020164               | 0,0676020164               | 0,0804990372               | 0,0824727531               | <b><u>0,0210288743</u></b> |
| UDCA  | <b><u>0,0293122741</u></b> | <b><u>0,0210288743</u></b> | <b><u>0,0210288743</u></b> | 0,0824727531               | 0,1058185576               | <b><u>0,0317926983</u></b> |
| aMCA  | 0,0625487454               | 0,0511263374               | 0,0511263374               | <b><u>0,0316715194</u></b> | <b><u>0,0210288743</u></b> | <b><u>0,0416833469</u></b> |
| bMCA  | <b><u>0,0332288547</u></b> | <b><u>0,0247018378</u></b> | <b><u>0,0247018378</u></b> | <b><u>0,02441475</u></b>   | <b><u>0,0210288743</u></b> | <b><u>0,027472278</u></b>  |
| wMCA  | 0,5394872572               | 0,5886545318               | 0,5886545318               | 0,564092973                | 0,6279604426               | 0,7731886381               |
| HCA   | <b><u>0,0411345153</u></b> | <b><u>0,0210288743</u></b> | <b><u>0,0210288743</u></b> | <b><u>0,0210288743</u></b> | <b><u>0,0268621264</u></b> | <b><u>0,0247018378</u></b> |
| HDCA  | 0,7629370232               | 0,7731886381               | 0,7731886381               | 0,6706450214               | 0,6543922896               | 0,8010843596               |
| TCA   | 0,6587099774               | 0,5542117152               | 0,5542117152               | 0,6587099774               | 0,8612450621               | 0,6837227517               |
| TCDCA | 0,5394872572               | 0,3265707493               | 0,3265707493               | 0,6543922896               | 0,7962595197               | 0,5638433977               |
| TDCA  | 0,5394872572               | 0,8010843596               | 0,8010843596               | 0,5263894621               | 0,5089964698               | 0,6279604426               |
| TLCA  | 0,3522393421               | 0,1690284038               | 0,1690284038               | 0,2668122737               | 0,5089964698               | 0,123313473                |
| TUDCA | 0,182969408                | 0,0953639224               | 0,0953639224               | 0,1596625739               | 0,2668122737               | <b><u>0,0416833469</u></b> |
| TaMCA | 0,7731886381               | 0,4943537925               | 0,4943537925               | 0,8191111001               | 0,8119576864               | 0,6014298703               |
| TbMCA | 0,2122742887               | 0,0824727531               | 0,0824727531               | 0,2668122737               | 0,3787832653               | 0,059642398                |
| TwMCA | 0,5089964698               | 0,6587099774               | 0,6587099774               | 0,4864343669               | 0,1745616427               | 0,6543922896               |
| THCA  | 0,1198747798               | <b><u>0,0332288547</u></b> | <b><u>0,0332288547</u></b> | 0,1058185576               | 0,4273856246               | 0,1548532                  |
| THDCA | 0,6931602198               | 0,4273856246               | 0,4273856246               | 0,6587099774               | 0,990904437                | 0,3614029283               |

r value

|       | Firmicutes_p                | Clostridia_c                | Clostridiales_o             | Ruminococcac<br>eae_f       | Oscillibacter_g<br>g        | Flavonifractor_             |
|-------|-----------------------------|-----------------------------|-----------------------------|-----------------------------|-----------------------------|-----------------------------|
| CA    | <b><u>-0,8391608596</u></b> | <b><u>-0,8881118894</u></b> | <b><u>-0,8881118894</u></b> | <b><u>-0,8601398468</u></b> | <b><u>-0,8321678042</u></b> | <b><u>-0,8521338105</u></b> |
| CDCA  | <b><u>-0,7342657447</u></b> | <b><u>-0,8531468511</u></b> | <b><u>-0,8531468511</u></b> | -0,6503496766               | -0,622377634                | <b><u>-0,7746670842</u></b> |
| DCA   | <b><u>0,7482517362</u></b>  | <b><u>0,7622377872</u></b>  | <b><u>0,7622377872</u></b>  | <b><u>0,8601398468</u></b>  | <b><u>0,8041958213</u></b>  | <b><u>0,8591762185</u></b>  |
| LCA   | <b><u>0,7203398347</u></b>  | <b><u>0,7576631308</u></b>  | <b><u>0,7576631308</u></b>  | <b><u>0,7352691293</u></b>  | <b><u>0,727804482</u></b>   | <b><u>0,8757789731</u></b>  |
| UDCA  | <b><u>-0,8251748085</u></b> | <b><u>-0,8601398468</u></b> | <b><u>-0,8601398468</u></b> | <b><u>-0,7272727489</u></b> | -0,6923077106               | <b><u>-0,8169216514</u></b> |
| aMCA  | <b><u>-0,7622377872</u></b> | <b><u>-0,7832167745</u></b> | <b><u>-0,7832167745</u></b> | <b><u>-0,8181818128</u></b> | <b><u>-0,8811188936</u></b> | <b><u>-0,7957943678</u></b> |
| bMCA  | <b><u>-0,811188817</u></b>  | <b><u>-0,8391608596</u></b> | <b><u>-0,8391608596</u></b> | <b><u>-0,8461538553</u></b> | <b><u>-0,8601398468</u></b> | <b><u>-0,8310065269</u></b> |
| wMCA  | 0,377622366                 | 0,3496503532                | 0,3496503532                | 0,3636363745                | 0,3286713362                | 0,2324001342                |
| HCA   | <b><u>-0,7972028255</u></b> | <b><u>-0,8741258979</u></b> | <b><u>-0,8741258979</u></b> | <b><u>-0,8531468511</u></b> | <b><u>-0,8321678042</u></b> | <b><u>-0,8450914025</u></b> |
| HDCA  | 0,2447552383                | 0,2167832106                | 0,2167832106                | 0,2937062979                | 0,3076923192                | 0,19718799                  |
| TCA   | -0,3006992936               | -0,3706293702               | -0,3706293702               | -0,3006992936               | -0,1538461596               | -0,288739562                |
| TCDCA | -0,377622366                | -0,5244755149               | -0,5244755149               | -0,3146853149               | -0,2027972043               | -0,3662062585               |
| TDCA  | 0,377622366                 | 0,1958041936                | 0,1958041936                | 0,3846153915                | 0,3916083872                | 0,3309941292                |
| TLCA  | -0,5104895234               | -0,6293706298               | -0,6293706298               | -0,5594405532               | -0,3986014128               | -0,6760730743               |
| TUDCA | -0,6153846383               | <b><u>-0,7132866979</u></b> | <b><u>-0,7132866979</u></b> | -0,6363636255               | -0,5594405532               | <b><u>-0,7957943678</u></b> |
| TaMCA | -0,2237762213               | -0,4125874043               | -0,4125874043               | -0,1818181872               | -0,188811183                | -0,345078975                |
| TbMCA | -0,5944055915               | <b><u>-0,7272727489</u></b> | <b><u>-0,7272727489</u></b> | -0,5594405532               | -0,4755244851               | <b><u>-0,7676246762</u></b> |
| TwMCA | 0,3916083872                | 0,3006992936                | 0,3006992936                | 0,4195804298                | 0,622377634                 | 0,3169092536                |
| THCA  | -0,6783216596               | <b><u>-0,811188817</u></b>  | <b><u>-0,811188817</u></b>  | -0,6923077106               | -0,4475524426               | -0,6408609748               |
| THDCA | -0,2797202766               | -0,4475524426               | -0,4475524426               | -0,3006992936               | -0,0069930069               | -0,5070548058               |

Caecal BA versus bact taxa

| Clostridium IV_g           | Pseudoflavonif ractor_g    | Butyricicoccus _g          | Anaerotruncus _g           | unclassified_R uminococcace ae | Lachnospirace ae_f         | Clostridium XIVb_g         |
|----------------------------|----------------------------|----------------------------|----------------------------|--------------------------------|----------------------------|----------------------------|
| 0,0706627549               | 0,137503667                | 0,0824727531               | <b><u>0,0316715194</u></b> | <b><u>0,0293122741</u></b>     | 0,1058185576               | 0,0804990372               |
| 0,1790684213               | 0,2668122737               | 0,1548532                  | 0,1690284038               | 0,1031823748                   | <b><u>0,02441475</u></b>   | 0,1528695267               |
| 0,1090731793               | 0,182969408                | <b><u>0,0210288743</u></b> | 0,0953639224               | <b><u>0,0210288743</u></b>     | <b><u>0,03706381</u></b>   | <b><u>0,0210288743</u></b> |
| 0,0816122319               | 0,2319190501               | <b><u>0,0268621264</u></b> | 0,139382061                | <b><u>0,0268621264</u></b>     | <b><u>0,0210288743</u></b> | 0,0824727531               |
| 0,1296208913               | 0,0850277592               | 0,0533994817               | 0,1357167582               | 0,0804990372                   | <b><u>0,0247018378</u></b> | 0,0676265616               |
| <b><u>0,0332288547</u></b> | <b><u>0,0332288547</u></b> | <b><u>0,0133648118</u></b> | <b><u>0,0210288743</u></b> | 0,0804990372                   | 0,1357167582               | <b><u>0,0247018378</u></b> |
| <b><u>0,0332288547</u></b> | <b><u>0,0332288547</u></b> | <b><u>0,0210288743</u></b> | <b><u>0,0210288743</u></b> | 0,0774997457                   | 0,1528695267               | <b><u>0,0268621264</u></b> |
| 0,8076713911               | 0,7861568757               | 0,6283174996               | 0,9509273658               | 0,5744378859                   | 0,2798288783               | 0,3714641822               |
| <b><u>0,0210288743</u></b> | 0,0706627549               | <b><u>0,0316715194</u></b> | <b><u>0,0293122741</u></b> | <b><u>0,0316715194</u></b>     | 0,0953639224               | 0,0804990372               |
| 0,8010843596               | 1                          | 0,8289065518               | 0,9509273658               | 0,7731886381                   | 0,7501643707               | 0,7215826685               |
| 0,9509273658               | 0,9215366205               | 0,9624876085               | 0,8418561149               | 0,564092973                    | 0,6014298703               | 0,8119576864               |
| 0,8597146214               | 0,8759619326               | 0,9328935542               | 0,7215826685               | 0,564092973                    | 0,4611370986               | 0,7629370232               |
| 0,7215826685               | 0,4705999859               | 0,3462877267               | 0,8612450621               | 0,6931602198                   | 0,7731886381               | 0,3714641822               |
| 0,6837227517               | 0,6543922896               | 0,4169973682               | 0,1198747798               | 0,0824727531                   | 0,1124311906               | 0,2939517471               |
| 0,4864343669               | 0,5632611733               | 0,256181406                | 0,1357167582               | 0,0824727531                   | 0,0972870029               | 0,1745616427               |
| 0,5886545318               | 0,9112792913               | 0,872692554                | 0,9509273658               | 0,7731886381                   | 0,5089964698               | 0,9215366205               |
| 0,4864343669               | 0,7381454542               | 0,4084675033               | 0,3146999174               | 0,0824727531                   | <b><u>0,0268621264</u></b> | 0,3265707493               |
| 0,3182599261               | 0,1508780843               | 0,1198747798               | 0,3076884609               | 0,564092973                    | 0,6440684016               | 0,3146999174               |
| 0,3076884609               | 0,3714641822               | 0,3714641822               | 0,3714641822               | 0,0972870029                   | 0,0559322036               | 0,182969408                |
| 0,9509273658               | 0,9112792913               | 0,9393523178               | 0,7731886381               | 0,3714641822                   | 0,2668122737               | 0,7962595197               |

| Clostridium IV_g            | Pseudoflavonif ractor_g     | Butyricicoccus _g           | Anaerotruncus _g            | unclassified_R uminococcace ae | Lachnospirace ae_f          | Clostridium XIVb_g          |
|-----------------------------|-----------------------------|-----------------------------|-----------------------------|--------------------------------|-----------------------------|-----------------------------|
| <b><u>-0,7495633364</u></b> | -0,6628297567               | <b><u>-0,727804482</u></b>  | <b><u>0,8181818128</u></b>  | <b><u>-0,8251748085</u></b>    | -0,6923077106               | <b><u>-0,7342657447</u></b> |
| -0,6199659109               | -0,5614557862               | -0,6419608593               | 0,6293706298                | -0,6993007064                  | <b><u>-0,8461538553</u></b> | -0,6433566213               |
| 0,6900185943                | 0,6160417795                | <b><u>0,8621684313</u></b>  | <b><u>-0,7132866979</u></b> | <b><u>0,8601398468</u></b>     | <b><u>0,8041958213</u></b>  | <b><u>0,8881118894</u></b>  |
| <b><u>0,7328190804</u></b>  | 0,5826761723                | <b><u>0,8326693177</u></b>  | -0,6606225371               | <b><u>0,8323097825</u></b>     | <b><u>0,8845623732</u></b>  | <b><u>0,727804482</u></b>   |
| -0,6690027714               | <b><u>-0,7252137065</u></b> | <b><u>-0,7800571322</u></b> | 0,6643356681                | <b><u>-0,7342657447</u></b>    | <b><u>-0,8391608596</u></b> | <b><u>-0,7552447319</u></b> |
| <b><u>-0,8126106858</u></b> | <b><u>-0,8109917045</u></b> | <b><u>-0,9218856692</u></b> | <b><u>0,8601398468</u></b>  | <b><u>-0,7342657447</u></b>    | -0,6643356681               | <b><u>-0,8391608596</u></b> |
| <b><u>-0,8126106858</u></b> | <b><u>-0,8109917045</u></b> | <b><u>-0,858436048</u></b>  | <b><u>0,8531468511</u></b>  | <b><u>-0,7412587404</u></b>    | -0,6433566213               | <b><u>-0,8321678042</u></b> |
| 0,1926447749                | 0,2105459124                | 0,3284451067                | -0,0559440553               | 0,3566433489                   | 0,5524475574                | 0,4825174809                |
| <b><u>-0,8581449389</u></b> | <b><u>-0,7486076951</u></b> | <b><u>-0,8173804283</u></b> | <b><u>0,8251748085</u></b>  | <b><u>-0,8181818128</u></b>    | <b><u>-0,7132866979</u></b> | <b><u>-0,7342657447</u></b> |
| 0,1961474121                | 0                           | 0,1754195392                | -0,062937066                | 0,2377622426                   | 0,2517482638                | 0,2657342553                |
| -0,0420315899               | 0,0935759619                | 0,0335909761                | 0,167832166                 | -0,3636363745                  | -0,3426573575               | -0,188811183                |
| -0,1576184481               | -0,1403639466               | -0,0858436078               | 0,2657342553                | -0,3636363745                  | -0,4335664213               | -0,2447552383               |
| 0,2662000656                | 0,4288898408                | 0,5150616169                | -0,1538461596               | 0,2797202766                   | 0,2167832106                | 0,4965035021                |
| -0,2872158587               | -0,311919868                | -0,4553443491               | 0,6783216596                | <b><u>-0,7272727489</u></b>    | -0,6853147149               | -0,5454545617               |
| -0,4203158915               | -0,3665058613               | -0,5673142672               | 0,6643356681                | <b><u>-0,7272727489</u></b>    | <b><u>-0,7062937021</u></b> | -0,622377634                |
| -0,350263238                | -0,1013739631               | -0,1455609053               | 0,0559440553                | -0,2167832106                  | -0,3916083872               | -0,0909090936               |
| -0,4203158915               | -0,2573339045               | -0,4590766728               | 0,5314685106                | <b><u>-0,7272727489</u></b>    | <b><u>-0,8321678042</u></b> | -0,5244755149               |
| 0,5288974643                | 0,6472337246                | 0,679284215                 | -0,538461566                | 0,3636363745                   | 0,3216783106                | 0,5314685106                |
| -0,5394054055               | -0,4990718067               | -0,4889353216               | 0,4825174809                | <b><u>-0,7062937021</u></b>    | <b><u>-0,7762237787</u></b> | -0,6153846383               |
| -0,0665500164               | 0,1013739631                | -0,0783789456               | 0,2237762213                | -0,4965035021                  | -0,5594405532               | -0,2027972043               |



Caecal BA versus bact taxa

| unclassified_L<br>achnospiracea_e | unclassified_CI<br>ostridiales | unclassified_Er<br>ysipelotrichace<br>ae | Enterococcace<br>ae_f      | Enterococcus_<br>g         | unclassified_CI<br>ostridia | Negativicutes_<br>c        |
|-----------------------------------|--------------------------------|------------------------------------------|----------------------------|----------------------------|-----------------------------|----------------------------|
| 0,1031823748                      | <b><u>0,0460795543</u></b>     | 0,5089964698                             | 0,0676265616               | 0,0676265616               | 0,1058185576                | 0,8759619326               |
| <b><u>0,0210288743</u></b>        | 0,0774997457                   | 0,5089964698                             | 0,0533994817               | 0,0533994817               | 0,1463240941                | 0,9050421726               |
| <b><u>0,0411345153</u></b>        | <b><u>0,0247018378</u></b>     | 0,2472896561                             | 0,1508780843               | 0,1508780843               | <b><u>0,02441475</u></b>    | 0,5744378859               |
| <b><u>0,0210288743</u></b>        | 0,0972870029                   | 0,1528695267                             | 0,3146999174               | 0,3146999174               | 0,0804990372                | 0,8479051839               |
| <b><u>0,0210288743</u></b>        | 0,0559322036                   | 0,2021018818                             | 0,1276980121               | 0,1276980121               | 0,0511263374                | 0,7065773409               |
| 0,1463240941                      | <b><u>0,0210288743</u></b>     | 0,0706627549                             | 0,3462877267               | 0,3462877267               | <b><u>0,0316715194</u></b>  | 0,9215366205               |
| 0,1463240941                      | <b><u>0,0210288743</u></b>     | 0,1528695267                             | 0,1904541381               | 0,1904541381               | <b><u>0,0268621264</u></b>  | 0,9215366205               |
| 0,3076884609                      | 0,3714641822                   | 0,8821385363                             | 0,5328223092               | 0,5328223092               | 0,4431543979                | 0,1528695267               |
| 0,0972870029                      | <b><u>0,0316715194</u></b>     | 0,1463240941                             | 0,167863832                | 0,167863832                | 0,0824727531                | 0,8010843596               |
| 0,7629370232                      | 0,7065773409                   | 0,7962595197                             | 0,7686953245               | 0,7686953245               | 0,7962595197                | <b><u>0,0293122741</u></b> |
| 0,5886545318                      | 0,7731886381                   | 0,3714641822                             | 0,1276980121               | 0,1276980121               | 0,8762374103                | 0,4943537925               |
| 0,4273856246                      | 0,564092973                    | 0,8821385363                             | 0,0816122319               | 0,0816122319               | 0,7861568757                | 0,8191111001               |
| 0,7215826685                      | 0,6587099774                   | 0,3265707493                             | 0,9460329853               | 0,9460329853               | 0,3714641822                | 0,9796241656               |
| 0,1276354455                      | 0,2939517471                   | 0,8289065518                             | <b><u>0,0247018378</u></b> | <b><u>0,0247018378</u></b> | 0,3668975542                | 0,7731886381               |
| 0,0900320161                      | 0,182969408                    | 0,7861568757                             | <b><u>0,0332288547</u></b> | <b><u>0,0332288547</u></b> | 0,2668122737                | 0,9328935542               |
| 0,5089964698                      | 0,7501643707                   | 0,8514481592                             | 0,6014298703               | 0,6014298703               | 0,9164754122                | 0,9680308461               |
| <b><u>0,0247018378</u></b>        | 0,2668122737                   | 0,9050421726                             | <b><u>0,0247018378</u></b> | <b><u>0,0247018378</u></b> | 0,3714641822                | 0,8191111001               |
| 0,7215826685                      | 0,3398725916                   | <b><u>0,0268621264</u></b>               | 0,9509273658               | 0,9509273658               | 0,3522393421                | 0,8701495339               |
| <b><u>0,0460795543</u></b>        | 0,0900320161                   | 0,7381454542                             | <b><u>0,0210288743</u></b> | <b><u>0,0210288743</u></b> | 0,1357167582                | 0,9393523178               |
| 0,2122742887                      | 0,7861568757                   | 0,6587099774                             | 0,0583507756               | 0,0583507756               | 0,7731886381                | 0,8289065518               |

| unclassified_L<br>achnospiracea_e | unclassified_CI<br>ostridiales | unclassified_Er<br>ysipelotrichace<br>ae | Enterococcace<br>ae_f      | Enterococcus_<br>g         | unclassified_CI<br>ostridia | Negativicutes_<br>c         |
|-----------------------------------|--------------------------------|------------------------------------------|----------------------------|----------------------------|-----------------------------|-----------------------------|
| -0,6993007064                     | <b><u>-0,7902097702</u></b>    | 0,4055944085                             | <b><u>0,7564057112</u></b> | <b><u>0,7564057112</u></b> | -0,6923077106               | -0,1398601383               |
| <b><u>-0,8601398468</u></b>       | <b><u>-0,7412587404</u></b>    | 0,3986014128                             | <b><u>0,7797996998</u></b> | <b><u>0,7797996998</u></b> | -0,6503496766               | -0,1048951074               |
| <b><u>0,7972028255</u></b>        | <b><u>0,8391608596</u></b>     | -0,5734265447                            | -0,6472337246              | -0,6472337246              | <b><u>0,8461538553</u></b>  | -0,3566433489               |
| <b><u>0,8845623732</u></b>        | <b><u>0,7054105401</u></b>     | -0,6456932425                            | -0,5327324867              | -0,5327324867              | <b><u>0,7352691293</u></b>  | -0,1642225534               |
| <b><u>-0,8741258979</u></b>       | <b><u>-0,7762237787</u></b>    | 0,6013985872                             | 0,6706277132               | 0,6706277132               | <b><u>-0,7832167745</u></b> | -0,2727272809               |
| -0,6503496766                     | <b><u>-0,8741258979</u></b>    | <b><u>0,7482517362</u></b>               | 0,514667809                | 0,514667809                | <b><u>-0,8181818128</u></b> | -0,0909090936               |
| -0,6503496766                     | <b><u>-0,8671328425</u></b>    | 0,6433566213                             | 0,6082437634               | 0,6082437634               | <b><u>-0,8321678042</u></b> | -0,0909090936               |
| 0,538461566                       | 0,4825174809                   | -0,1258741319                            | -0,3821018636              | -0,3821018636              | 0,4405594468                | -0,6433566213               |
| <b><u>-0,7062937021</u></b>       | <b><u>-0,8181818128</u></b>    | 0,6503496766                             | 0,6316377521               | 0,6316377521               | <b><u>-0,7272727489</u></b> | -0,1958041936               |
| 0,2447552383                      | 0,2727272809                   | 0,2027972043                             | -0,2417379022              | -0,2417379022              | 0,2027972043                | <b><u>-0,8251748085</u></b> |
| -0,3496503532                     | -0,2307692319                  | -0,4825174809                            | 0,6706277132               | 0,6706277132               | -0,1328671277               | 0,4125874043                |
| -0,4475524426                     | -0,3636363745                  | -0,1258741319                            | <b><u>0,7330117226</u></b> | <b><u>0,7330117226</u></b> | -0,2097902149               | -0,1818181872               |
| 0,2657342553                      | 0,3006992936                   | -0,5244755149                            | 0,0701819733               | 0,0701819733               | 0,4965035021                | -0,0209790207               |
| -0,6713286638                     | -0,5454545617                  | 0,1748251766                             | <b><u>0,8421836495</u></b> | <b><u>0,8421836495</u></b> | -0,5034965277               | -0,2237762213               |
| <b><u>-0,7202796936</u></b>       | -0,6153846383                  | 0,2097902149                             | <b><u>0,8109917045</u></b> | <b><u>0,8109917045</u></b> | -0,5594405532               | -0,083916083                |
| -0,4055944085                     | -0,2517482638                  | 0,1608391553                             | 0,3431118727               | 0,3431118727               | -0,0979020968               | 0,0279720277                |
| <b><u>-0,8391608596</u></b>       | -0,5594405532                  | 0,1048951074                             | <b><u>0,8421836495</u></b> | <b><u>0,8421836495</u></b> | -0,4965035021               | 0,1818181872                |
| 0,2657342553                      | 0,5174825191                   | <b><u>-0,8321678042</u></b>              | 0,0623839758               | 0,0623839758               | 0,5104895234                | 0,1468531489                |
| <b><u>-0,7902097702</u></b>       | <b><u>-0,7202796936</u></b>    | 0,2587412596                             | <b><u>0,8577796817</u></b> | <b><u>0,8577796817</u></b> | -0,6643356681               | 0,0769230798                |
| -0,5944055915                     | -0,2097902149                  | -0,3006992936                            | <b><u>0,7720016837</u></b> | <b><u>0,7720016837</u></b> | -0,2237762213               | 0,1748251766                |

Caecal BA versus bact taxa

|                            | unclassified_S             |                            |                            | unclassified_D             |                            |                            |
|----------------------------|----------------------------|----------------------------|----------------------------|----------------------------|----------------------------|----------------------------|
| Selenomonadales_o          | elenomonadales_o           | Deltaproteobacteria_c      | Desulfovibrionales_o       | esulfovibrionales          | Betaproteobacteria_c       | Burkholderiales_o          |
| 0,8759619326               | 0,8514481592               | 0,0972870029               | 0,0804990372               | 0,0804990372               | 0,1528695267               | 0,1528695267               |
| 0,9050421726               | 0,9050421726               | 0,1417543979               | 0,1745616427               | 0,1745616427               | 0,3714641822               | 0,3714641822               |
| 0,5744378859               | 0,6440684016               | <b><u>0,0247018378</u></b> | <b><u>0,0210288743</u></b> | <b><u>0,0210288743</u></b> | 0,1357167582               | 0,1357167582               |
| 0,8479051839               | 0,9509273658               | <b><u>0,0133648118</u></b> | <b><u>0,0155245829</u></b> | <b><u>0,0155245829</u></b> | 0,095398303                | 0,095398303                |
| 0,7065773409               | 0,6279604426               | 0,0900320161               | 0,1058185576               | 0,1058185576               | 0,1463240941               | 0,1463240941               |
| 0,9215366205               | 0,9164754122               | 0,1690284038               | 0,1463240941               | 0,1463240941               | <b><u>0,0247018378</u></b> | <b><u>0,0247018378</u></b> |
| 0,9215366205               | 0,9164754122               | 0,1904541381               | 0,1528695267               | 0,1528695267               | 0,0625487454               | 0,0625487454               |
| 0,1528695267               | 0,1690284038               | 0,3919294787               | 0,4723396534               | 0,4723396534               | 0,8289065518               | 0,8289065518               |
| 0,8010843596               | 0,6931602198               | 0,0804990372               | 0,0676265616               | 0,0676265616               | <b><u>0,0332288547</u></b> | <b><u>0,0332288547</u></b> |
| <b><u>0,0293122741</u></b> | <b><u>0,0411345153</u></b> | 0,6279604426               | 0,5886545318               | 0,5886545318               | 1                          | 1                          |
| 0,4943537925               | 0,3522393421               | 0,7731886381               | 0,7731886381               | 0,7731886381               | 0,7861568757               | 0,7861568757               |
| 0,8191111001               | 0,9215366205               | 0,7381454542               | 0,7731886381               | 0,7731886381               | 0,9680308461               | 0,9680308461               |
| 0,9796241656               | 0,8762374103               | 0,3787832653               | 0,3714641822               | 0,3714641822               | 0,4864343669               | 0,4864343669               |
| 0,7731886381               | 0,9509273658               | 0,4611370986               | 0,4943537925               | 0,4943537925               | 0,6706450214               | 0,6706450214               |
| 0,9328935542               | 1                          | 0,182969408                | 0,2021018818               | 0,2021018818               | 0,6543922896               | 0,6543922896               |
| 0,9680308461               | 0,9050421726               | 0,4169973682               | 0,4943537925               | 0,4943537925               | 0,9215366205               | 0,9215366205               |
| 0,8191111001               | 0,7731886381               | 0,1124311906               | 0,1417543979               | 0,1417543979               | 0,7731886381               | 0,7731886381               |
| 0,8701495339               | 0,8514481592               | 0,6177653709               | 0,5886545318               | 0,5886545318               | <b><u>0,0332288547</u></b> | <b><u>0,0332288547</u></b> |
| 0,9393523178               | 0,9509273658               | 0,2668122737               | 0,3076884609               | 0,3076884609               | 0,5089964698               | 0,5089964698               |
| 0,8289065518               | 0,7731886381               | 0,564092973                | 0,6177653709               | 0,6177653709               | 0,8289065518               | 0,8289065518               |

|                             | unclassified_S              |                             |                             | unclassified_D              |                             |                             |
|-----------------------------|-----------------------------|-----------------------------|-----------------------------|-----------------------------|-----------------------------|-----------------------------|
| Selenomonadales_o           | elenomonadales_o            | Deltaproteobacteria_c       | Desulfovibrionales_o        | esulfovibrionales           | Betaproteobacteria_c        | Burkholderiales_o           |
| -0,1398601383               | -0,1608391553               | <b><u>-0,7062937021</u></b> | <b><u>-0,7342657447</u></b> | <b><u>-0,7342657447</u></b> | 0,6433566213                | 0,6433566213                |
| -0,1048951074               | -0,1048951074               | -0,6573426723               | -0,622377634                | -0,622377634                | 0,4895104766                | 0,4895104766                |
| -0,3566433489               | -0,3216783106               | <b><u>0,8391608596</u></b>  | <b><u>0,8531468511</u></b>  | <b><u>0,8531468511</u></b>  | -0,6643356681               | -0,6643356681               |
| -0,1642225534               | -0,0447879694               | <b><u>0,9069563746</u></b>  | <b><u>0,8994917274</u></b>  | <b><u>0,8994917274</u></b>  | <b><u>-0,7128751874</u></b> | <b><u>-0,7128751874</u></b> |
| -0,2727272809               | -0,3286713362               | <b><u>-0,7202796936</u></b> | -0,6923077106               | -0,6923077106               | 0,6503496766                | 0,6503496766                |
| -0,0909090936               | -0,0979020968               | -0,6293706298               | -0,6503496766               | -0,6503496766               | <b><u>0,8391608596</u></b>  | <b><u>0,8391608596</u></b>  |
| -0,0909090936               | -0,0979020968               | -0,608391583                | -0,6433566213               | -0,6433566213               | <b><u>0,7622377872</u></b>  | <b><u>0,7622377872</u></b>  |
| -0,6433566213               | -0,6293706298               | 0,4685314596                | 0,4265734255                | 0,4265734255                | -0,1748251766               | -0,1748251766               |
| -0,1958041936               | -0,2797202766               | <b><u>-0,7342657447</u></b> | <b><u>-0,7552447319</u></b> | <b><u>-0,7552447319</u></b> | <b><u>0,811188817</u></b>   | <b><u>0,811188817</u></b>   |
| <b><u>-0,8251748085</u></b> | <b><u>-0,7972028255</u></b> | 0,3286713362                | 0,3496503532                | 0,3496503532                | 0                           | 0                           |
| 0,4125874043                | 0,5104895234                | -0,2307692319               | -0,2377622426               | -0,2377622426               | -0,2097902149               | -0,2097902149               |
| -0,1818181872               | -0,0909090936               | -0,2587412596               | -0,2237762213               | -0,2237762213               | -0,0279720277               | -0,0279720277               |
| -0,0209790207               | 0,1328671277                | 0,4755244851                | 0,4895104766                | 0,4895104766                | -0,4195804298               | -0,4195804298               |
| -0,2237762213               | -0,062937066                | -0,4335664213               | -0,4125874043               | -0,4125874043               | 0,2937062979                | 0,2937062979                |
| -0,083916083                | 0                           | -0,6153846383               | -0,6013985872               | -0,6013985872               | 0,3076923192                | 0,3076923192                |
| 0,0279720277                | -0,1048951074               | -0,4545454681               | -0,4125874043               | -0,4125874043               | 0,0909090936                | 0,0909090936                |
| 0,1818181872                | 0,2237762213                | -0,6853147149               | -0,6573426723               | -0,6573426723               | 0,2307692319                | 0,2307692319                |
| 0,1468531489                | 0,1608391553                | 0,3356643319                | 0,3496503532                | 0,3496503532                | <b><u>-0,811188817</u></b>  | <b><u>-0,811188817</u></b>  |
| 0,0769230798                | 0,0419580415                | -0,5594405532               | -0,538461566                | -0,538461566                | 0,4055944085                | 0,4055944085                |
| 0,1748251766                | 0,2167832106                | -0,3636363745               | -0,3356643319               | -0,3356643319               | -0,1748251766               | -0,1748251766               |

Caecal BA versus bact taxa

| Sutterellaceae_f           | Parasutterella_g           | Gammaproteobacteria_c      | Enterobacteriales_o        | Enterobacteriaceae_f       | Escherichia/Shigella_g     | unclassified_Enterobacteriaceae |
|----------------------------|----------------------------|----------------------------|----------------------------|----------------------------|----------------------------|---------------------------------|
| 0,1031823748               | 0,1031823748               | 0,1904541381               | 0,1904541381               | 0,1904541381               | 0,3146999174               | 0,1503590862                    |
| 0,2798288783               | 0,2798288783               | 0,1124311906               | 0,1904541381               | 0,1904541381               | 0,3668975542               | 0,172726193                     |
| 0,1904541381               | 0,1904541381               | 0,4723396534               | 0,4431543979               | 0,4431543979               | 0,564092973                | 0,2514983557                    |
| 0,0824727531               | 0,0824727531               | 0,6543922896               | 0,6706450214               | 0,6706450214               | 0,8010843596               | 0,3714641822                    |
| 0,1058185576               | 0,1058185576               | 0,4431543979               | 0,5089964698               | 0,5089964698               | 0,6931602198               | 0,4246634467                    |
| 0,0559322036               | 0,0559322036               | 0,6587099774               | 0,6706450214               | 0,6706450214               | 0,8010843596               | 0,6279604426                    |
| 0,0953639224               | 0,0953639224               | 0,4273856246               | 0,4034616129               | 0,4034616129               | 0,5394872572               | 0,4169973682                    |
| 0,9164754122               | 0,9164754122               | 0,6440684016               | 0,6706450214               | 0,6706450214               | 0,6279604426               | 0,6440684016                    |
| <b><u>0,0210288743</u></b> | <b><u>0,0210288743</u></b> | 0,5089964698               | 0,5089964698               | 0,5089964698               | 0,6931602198               | 0,4273856246                    |
| 0,9215366205               | 0,9215366205               | 0,4943537925               | 0,4864343669               | 0,4864343669               | 0,3398725916               | 0,4805933016                    |
| 0,8759619326               | 0,8759619326               | <b><u>0,0210288743</u></b> | <b><u>0,0268621264</u></b> | <b><u>0,0268621264</u></b> | <b><u>0,0210288743</u></b> | 0,057490111                     |
| 0,9050421726               | 0,9050421726               | 0,0706627549               | 0,1124311906               | 0,1124311906               | 0,182969408                | 0,172726193                     |
| 0,6279604426               | 0,6279604426               | 0,564092973                | 0,6706450214               | 0,6706450214               | 0,6543922896               | 0,8927367304                    |
| 0,5089964698               | 0,5089964698               | 0,1198747798               | 0,182969408                | 0,182969408                | 0,3714641822               | 0,1386920084                    |
| 0,5263894621               | 0,5263894621               | 0,0972870029               | 0,1463240941               | 0,1463240941               | 0,3146999174               | 0,0731994906                    |
| 0,8119576864               | 0,8119576864               | 0,5886545318               | 0,6587099774               | 0,6587099774               | 0,7962595197               | 0,564092973                     |
| 0,6279604426               | 0,6279604426               | <b><u>0,0268621264</u></b> | 0,0583507756               | 0,0583507756               | 0,1124311906               | <b><u>0,0210288743</u></b>      |
| 0,0972870029               | 0,0972870029               | 0,6177653709               | 0,6543922896               | 0,6543922896               | 0,5744378859               | 0,7731886381                    |
| 0,3919294787               | 0,3919294787               | 0,0972870029               | 0,1276354455               | 0,1276354455               | 0,2021018818               | 0,2020207696                    |
| 0,961020361                | 0,961020361                | <b><u>0,0316715194</u></b> | 0,0706627549               | 0,0706627549               | 0,1124311906               | 0,057490111                     |

| Sutterellaceae_f            | Parasutterella_g            | Gammaproteobacteria_c      | Enterobacteriales_o        | Enterobacteriaceae_f       | Escherichia/Shigella_g     | unclassified_Enterobacteriaceae |
|-----------------------------|-----------------------------|----------------------------|----------------------------|----------------------------|----------------------------|---------------------------------|
| 0,6993007064                | 0,6993007064                | 0,608391583                | 0,608391583                | 0,608391583                | 0,5314685106               | 0,6479870081                    |
| 0,5524475574                | 0,5524475574                | 0,6853147149               | 0,608391583                | 0,608391583                | 0,5034965277               | 0,6269711852                    |
| -0,608391583                | -0,608391583                | -0,4265734255              | -0,4405594468              | -0,4405594468              | -0,3636363745              | -0,5709290504                   |
| <b><u>-0,727804482</u></b>  | <b><u>-0,727804482</u></b>  | -0,3097834587              | -0,2948541343              | -0,2948541343              | -0,1978135258              | -0,4841840565                   |
| 0,6923077106                | 0,6923077106                | 0,4405594468               | 0,3916083872               | 0,3916083872               | 0,2797202766               | 0,4518395662                    |
| <b><u>0,7762237787</u></b>  | <b><u>0,7762237787</u></b>  | 0,3006992936               | 0,2937062979               | 0,2937062979               | 0,1958041936               | 0,3292474449                    |
| <b><u>0,7132866979</u></b>  | <b><u>0,7132866979</u></b>  | 0,4475524426               | 0,4615384638               | 0,4615384638               | 0,377622366                | 0,4553422034                    |
| -0,0979020968               | -0,0979020968               | -0,3216783106              | -0,2937062979              | -0,2937062979              | -0,3286713362              | -0,3222421706                   |
| <b><u>0,8531468511</u></b>  | <b><u>0,8531468511</u></b>  | 0,3916083872               | 0,3916083872               | 0,3916083872               | 0,2797202766               | 0,4483369291                    |
| 0,0909090936                | 0,0909090936                | -0,4125874043              | -0,4195804298              | -0,4195804298              | -0,5174825191              | -0,4238184988                   |
| -0,1398601383               | -0,1398601383               | <b><u>0,8531468511</u></b> | <b><u>0,8321678042</u></b> | <b><u>0,8321678042</u></b> | <b><u>0,8811188936</u></b> | <b><u>0,7740817666</u></b>      |
| 0,1048951074                | 0,1048951074                | <b><u>0,7482517362</u></b> | 0,6853147149               | 0,6853147149               | 0,6153846383               | 0,6269711852                    |
| -0,3286713362               | -0,3286713362               | 0,3636363745               | 0,2937062979               | 0,2937062979               | 0,3146853149               | 0,1190894991                    |
| 0,4055944085                | 0,4055944085                | 0,6783216596               | 0,6153846383               | 0,6153846383               | 0,4895104766               | 0,6619974971                    |
| 0,3846153915                | 0,3846153915                | <b><u>0,7062937021</u></b> | 0,6503496766               | 0,6503496766               | 0,5314685106               | <b><u>0,7460606694</u></b>      |
| 0,188811183                 | 0,188811183                 | 0,3496503532               | 0,3006992936               | 0,3006992936               | 0,2027972043               | 0,3642737567                    |
| 0,3286713362                | 0,3286713362                | <b><u>0,8321678042</u></b> | <b><u>0,769230783</u></b>  | <b><u>0,769230783</u></b>  | 0,6853147149               | <b><u>0,8616475463</u></b>      |
| <b><u>-0,7062937021</u></b> | <b><u>-0,7062937021</u></b> | 0,3356643319               | 0,3076923192               | 0,3076923192               | 0,3566433489               | 0,2311737388                    |
| 0,4685314596                | 0,4685314596                | <b><u>0,7062937021</u></b> | 0,6713286638               | 0,6713286638               | 0,6013985872               | 0,602452755                     |
| -0,0349650346               | -0,0349650346               | <b><u>0,8181818128</u></b> | <b><u>0,7482517362</u></b> | <b><u>0,7482517362</u></b> | 0,6853147149               | <b><u>0,7740817666</u></b>      |

Caecal BA versus bact taxa

| unclassified_D<br>eltaproteobact<br>eria | Bacteroidetes_<br>p        | Bacteroidia_<br>c          | Bacteroidales_<br>o        | Porphyromona<br>daceae_f   | Parabacteroide<br>s_g    | Barnesiella_g              |
|------------------------------------------|----------------------------|----------------------------|----------------------------|----------------------------|--------------------------|----------------------------|
| 0,0804990372                             | <b><u>0,0210288743</u></b> | <b><u>0,0210288743</u></b> | <b><u>0,0210288743</u></b> | 0,1124311906               | 0,1463240941             | <b><u>0,0416833469</u></b> |
| 0,1276354455                             | 0,0706627549               | 0,0706627549               | 0,0706627549               | 0,3714641822               | 0,4034616129             | 0,1153867459               |
| <b><u>0,02441475</u></b>                 | 0,1198747798               | 0,1198747798               | 0,1198747798               | 0,4943537925               | 0,4723396534             | <b><u>0,0133648118</u></b> |
| <b><u>0,0133648118</u></b>               | 0,0972870029               | 0,0972870029               | 0,0972870029               | 0,2322514881               | 0,2472896561             | <b><u>0,0210288743</u></b> |
| 0,0824727531                             | 0,0511263374               | 0,0511263374               | 0,0511263374               | 0,1417543979               | 0,182969408              | 0,0818817577               |
| 0,1463240941                             | 0,1031823748               | 0,1031823748               | 0,1031823748               | 0,0972870029               | 0,0804990372             | 0,0925834609               |
| 0,1690284038                             | 0,0774997457               | 0,0774997457               | 0,0774997457               | 0,0972870029               | 0,0953639224             | 0,0972870029               |
| 0,4273856246                             | 0,6440684016               | 0,6440684016               | 0,6440684016               | 0,7731886381               | 0,8191111001             | 0,4688115042               |
| 0,0774997457                             | <b><u>0,03706381</u></b>   | <b><u>0,03706381</u></b>   | <b><u>0,03706381</u></b>   | <b><u>0,0316715194</u></b> | <b><u>0,03706381</u></b> | 0,0524805774               |
| 0,6177653709                             | 0,7381454542               | 0,7381454542               | 0,7381454542               | 0,7731886381               | 0,7962595197             | 0,7359338344               |
| 0,7731886381                             | 0,6014298703               | 0,6014298703               | 0,6014298703               | 0,6837227517               | 0,6440684016             | 0,6420305051               |
| 0,6931602198                             | 0,4273856246               | 0,4273856246               | 0,4273856246               | 0,9009562422               | 0,9509273658             | 0,5500148416               |
| 0,3714641822                             | 0,7065773409               | 0,7065773409               | 0,7065773409               | 0,5263894621               | 0,564092973              | 0,4943537925               |
| 0,4431543979                             | 0,3714641822               | 0,3714641822               | 0,3714641822               | 0,8191111001               | 0,8759619326             | 0,1153867459               |
| 0,1417543979                             | 0,1596625739               | 0,1596625739               | 0,1596625739               | 0,5886545318               | 0,6706450214             | 0,059642398                |
| 0,3787832653                             | 0,5394872572               | 0,5394872572               | 0,5394872572               | 0,5394872572               | 0,6014298703             | 0,6543922896               |
| 0,0972870029                             | 0,1528695267               | 0,1528695267               | 0,1528695267               | 0,7962595197               | 0,8514481592             | 0,0796610432               |
| 0,6014298703                             | 0,6543922896               | 0,6543922896               | 0,6543922896               | 0,3076884609               | 0,1690284038             | 0,5744378859               |
| 0,3522393421                             | 0,182969408                | 0,182969408                | 0,182969408                | 0,7629370232               | 0,7731886381             | 0,1642254019               |
| 0,6014298703                             | 0,6706450214               | 0,6706450214               | 0,6706450214               | 0,8514481592               | 0,7501643707             | 0,4273856246               |

| unclassified_D<br>eltaproteobact<br>eria | Bacteroidetes_<br>p         | Bacteroidia_<br>c           | Bacteroidales_<br>o         | Porphyromona<br>daceae_f   | Parabacteroide<br>s_g      | Barnesiella_g               |
|------------------------------------------|-----------------------------|-----------------------------|-----------------------------|----------------------------|----------------------------|-----------------------------|
| <b><u>-0,7342657447</u></b>              | <b><u>0,8601398468</u></b>  | <b><u>0,8601398468</u></b>  | <b><u>0,8601398468</u></b>  | 0,6853147149               | 0,6503496766               | <b><u>-0,7957943678</u></b> |
| -0,6713286638                            | <b><u>0,7482517362</u></b>  | <b><u>0,7482517362</u></b>  | <b><u>0,7482517362</u></b>  | 0,4895104766               | 0,4615384638               | -0,6831155419               |
| <b><u>0,8461538553</u></b>               | -0,6783216596               | -0,6783216596               | -0,6783216596               | -0,4125874043              | -0,4265734255              | <b><u>0,9155156612</u></b>  |
| <b><u>0,9069563746</u></b>               | <b><u>-0,7091428638</u></b> | <b><u>-0,7091428638</u></b> | <b><u>-0,7091428638</u></b> | -0,5822436213              | -0,5747789145              | <b><u>0,8532267213</u></b>  |
| <b><u>-0,7272727489</u></b>              | <b><u>0,7832167745</u></b>  | <b><u>0,7832167745</u></b>  | <b><u>0,7832167745</u></b>  | 0,6573426723               | 0,6153846383               | <b><u>-0,7324125171</u></b> |
| -0,6503496766                            | 0,6993007064                | 0,6993007064                | 0,6993007064                | <b><u>0,7062937021</u></b> | <b><u>0,7342657447</u></b> | <b><u>-0,7183277011</u></b> |
| -0,6293706298                            | <b><u>0,7412587404</u></b>  | <b><u>0,7412587404</u></b>  | <b><u>0,7412587404</u></b>  | <b><u>0,7062937021</u></b> | <b><u>0,7132866979</u></b> | <b><u>-0,7112852335</u></b> |
| 0,4475524426                             | -0,3216783106               | -0,3216783106               | -0,3216783106               | 0,2307692319               | 0,1818181872               | 0,4295881093                |
| <b><u>-0,7412587404</u></b>              | <b><u>0,8041958213</u></b>  | <b><u>0,8041958213</u></b>  | <b><u>0,8041958213</u></b>  | <b><u>0,8181818128</u></b> | <b><u>0,8041958213</u></b> | <b><u>-0,7817095518</u></b> |
| 0,3356643319                             | -0,2587412596               | -0,2587412596               | -0,2587412596               | 0,2377622426               | 0,2027972043               | 0,2605698407                |
| -0,2377622426                            | 0,3426573575                | 0,3426573575                | 0,3426573575                | -0,2867132723              | -0,3216783106              | -0,3239516914               |
| -0,2797202766                            | 0,4475524426                | 0,4475524426                | 0,4475524426                | 0,1118881106               | 0,0559440553               | -0,3732486963               |
| 0,4825174809                             | -0,2727272809               | -0,2727272809               | -0,2727272809               | -0,3846153915              | -0,3636363745              | 0,4155032635                |
| -0,4405594468                            | 0,4825174809                | 0,4825174809                | 0,4825174809                | 0,1818181872               | 0,1398601383               | -0,6831155419               |
| -0,6573426723                            | 0,6363636255                | 0,6363636255                | 0,6363636255                | 0,3496503532               | 0,2937062979               | <b><u>-0,7676246762</u></b> |
| -0,4755244851                            | 0,377622366                 | 0,377622366                 | 0,377622366                 | 0,377622366                | 0,3426573575               | -0,3169092536               |
| <b><u>-0,7062937021</u></b>              | 0,6433566213                | 0,6433566213                | 0,6433566213                | 0,2027972043               | 0,1608391553               | <b><u>-0,7394549847</u></b> |
| 0,3426573575                             | -0,3146853149               | -0,3146853149               | -0,3146853149               | -0,538461566               | -0,6293706298              | 0,3591638505                |
| -0,5104895234                            | 0,6153846383                | 0,6153846383                | 0,6153846383                | 0,2447552383               | 0,2167832106               | -0,6338185072               |
| -0,3426573575                            | 0,2937062979                | 0,2937062979                | 0,2937062979                | -0,1608391553              | -0,2517482638              | -0,4507153928               |

Caecal BA versus bact taxa

| Butyricimonas_g            | unclassified_P<br>orphyromonadaceae | Bacteroidacea<br>e_f       | Bacteroides_g              | Deferribacteres<br>_p      | Deferribacteres<br>_c      | Deferribacterial<br>es_o   |
|----------------------------|-------------------------------------|----------------------------|----------------------------|----------------------------|----------------------------|----------------------------|
| 0,5089964698               | 0,1690284038                        | 0,4864343669               | 0,4864343669               | 0,172726193                | 0,172726193                | 0,172726193                |
| 0,3714641822               | 0,1357167582                        | 0,6279604426               | 0,6279604426               | 0,2122742887               | 0,2122742887               | 0,2122742887               |
| 0,5965174846               | 0,1276354455                        | 0,7731886381               | 0,7731886381               | <b><u>0,0133648118</u></b> | <b><u>0,0133648118</u></b> | <b><u>0,0133648118</u></b> |
| 0,8119576864               | 0,139382061                         | 0,9509273658               | 0,9509273658               | <b><u>0,0210288743</u></b> | <b><u>0,0210288743</u></b> | <b><u>0,0210288743</u></b> |
| 0,7939266217               | 0,2572840617                        | 0,9328935542               | 0,9328935542               | 0,1058185576               | 0,1058185576               | 0,1058185576               |
| 0,9839634333               | 0,4169973682                        | 0,9509273658               | 0,9509273658               | <b><u>0,0303607629</u></b> | <b><u>0,0303607629</u></b> | <b><u>0,0303607629</u></b> |
| 0,8762374103               | 0,3787832653                        | 0,8010843596               | 0,8010843596               | 0,0951236888               | 0,0951236888               | 0,0951236888               |
| 0,4510968547               | 0,6543922896                        | 0,4864343669               | 0,4864343669               | 0,5027606059               | 0,5027606059               | 0,5027606059               |
| 0,8183372119               | 0,2220724614                        | 0,9009562422               | 0,9009562422               | 0,0972870029               | 0,0972870029               | 0,0972870029               |
| 0,3714641822               | 0,7731886381                        | 0,1904541381               | 0,1904541381               | 0,8479051839               | 0,8479051839               | 0,8479051839               |
| <b><u>0,0155245829</u></b> | 0,5886545318                        | <b><u>0,0119583287</u></b> | <b><u>0,0119583287</u></b> | 0,9680308461               | 0,9680308461               | 0,9680308461               |
| 0,0701009481               | 0,2572840617                        | 0,1690284038               | 0,1690284038               | 0,9050421726               | 0,9050421726               | 0,9050421726               |
| 0,56154301                 | 0,8119576864                        | 0,5744378859               | 0,5744378859               | 0,3158750946               | 0,3158750946               | 0,3158750946               |
| 0,2631392979               | 0,3398725916                        | 0,564092973                | 0,564092973                | 0,3146999174               | 0,3146999174               | 0,3146999174               |
| 0,182969408                | 0,0583507756                        | 0,4943537925               | 0,4943537925               | 0,1548532                  | 0,1548532                  | 0,1548532                  |
| 0,3856612178               | 0,0625487454                        | 0,9009562422               | 0,9009562422               | 0,7731886381               | 0,7731886381               | 0,7731886381               |
| 0,0528691744               | <b><u>0,0460795543</u></b>          | 0,3668975542               | 0,3668975542               | 0,2755888484               | 0,2755888484               | 0,2755888484               |
| 0,2860133223               | 0,990904437                         | 0,4273856246               | 0,4273856246               | 0,1272892381               | 0,1272892381               | 0,1272892381               |
| 0,1876172366               | 0,4169973682                        | 0,3714641822               | 0,3714641822               | 0,5488731417               | 0,5488731417               | 0,5488731417               |
| <b><u>0,0210288743</u></b> | 0,3714641822                        | 0,2939517471               | 0,2939517471               | 0,8949213855               | 0,8949213855               | 0,8949213855               |

| Butyricimonas_g            | unclassified_P<br>orphyromonadaceae | Bacteroidacea<br>e_f       | Bacteroides_g              | Deferribacteres<br>_p       | Deferribacteres<br>_c       | Deferribacterial<br>es_o    |
|----------------------------|-------------------------------------|----------------------------|----------------------------|-----------------------------|-----------------------------|-----------------------------|
| 0,4063053429               | -0,6293706298                       | 0,4195804298               | 0,4195804298               | -0,6264336705               | -0,6264336705               | -0,6264336705               |
| 0,4973737895               | -0,6643356681                       | 0,3286713362               | 0,3286713362               | -0,5944001675               | -0,5944001675               | -0,5944001675               |
| -0,3467606008              | 0,6713286638                        | -0,2237762213              | -0,2237762213              | <b><u>0,9076169729</u></b>  | <b><u>0,9076169729</u></b>  | <b><u>0,9076169729</u></b>  |
| -0,1906825155              | 0,6606225371                        | 0,0634496212               | 0,0634496212               | <b><u>0,870049715</u></b>   | <b><u>0,870049715</u></b>   | <b><u>0,870049715</u></b>   |
| 0,2066553086               | -0,5664335489                       | 0,083916083                | 0,083916083                | -0,6940600872               | -0,6940600872               | -0,6940600872               |
| 0,0175131615               | -0,4545454681                       | 0,0419580415               | 0,0419580415               | <b><u>-0,8221942186</u></b> | <b><u>-0,8221942186</u></b> | <b><u>-0,8221942186</u></b> |
| 0,1366026551               | -0,4755244851                       | 0,1958041936               | 0,1958041936               | <b><u>-0,7154157758</u></b> | <b><u>-0,7154157758</u></b> | <b><u>-0,7154157758</u></b> |
| -0,4378290474              | 0,3146853149                        | -0,4195804298              | -0,4195804298              | 0,4093174636                | 0,4093174636                | 0,4093174636                |
| 0,1856395155               | -0,5874125957                       | 0,1118881106               | 0,1118881106               | <b><u>-0,7082971931</u></b> | <b><u>-0,7082971931</u></b> | <b><u>-0,7082971931</u></b> |
| -0,4868659079              | 0,2237762213                        | -0,608391583               | -0,608391583               | 0,1637269855                | 0,1637269855                | 0,1637269855                |
| <b><u>0,9001765251</u></b> | -0,3496503532                       | <b><u>0,9370629191</u></b> | <b><u>0,9370629191</u></b> | 0,0284742583                | 0,0284742583                | 0,0284742583                |
| <b><u>0,7530659437</u></b> | -0,5664335489                       | 0,6293706298               | 0,6293706298               | -0,1067784727               | -0,1067784727               | -0,1067784727               |
| 0,3677763939               | 0,188811183                         | 0,3566433489               | 0,3566433489               | 0,5303330421                | 0,5303330421                | 0,5303330421                |
| 0,5639238358               | -0,5174825191                       | 0,3636363745               | 0,3636363745               | -0,5338923335               | -0,5338923335               | -0,5338923335               |
| 0,6164633036               | <b><u>-0,769230783</u></b>          | 0,4125874043               | 0,4125874043               | -0,640670836                | -0,640670836                | -0,640670836                |
| 0,4728553593               | <b><u>-0,7622377872</u></b>         | 0,1118881106               | 0,1118881106               | -0,2171162218               | -0,2171162218               | -0,2171162218               |
| <b><u>0,7810870409</u></b> | <b><u>-0,7902097702</u></b>         | 0,5034965277               | 0,5034965277               | -0,5552480221               | -0,5552480221               | -0,5552480221               |
| 0,5499132872               | 0,0069930069                        | 0,4475524426               | 0,4475524426               | 0,672704339                 | 0,672704339                 | 0,672704339                 |
| 0,6129606366               | -0,4545454681                       | 0,4895104766               | 0,4895104766               | -0,3737246394               | -0,3737246394               | -0,3737246394               |
| <b><u>0,8581449389</u></b> | -0,4965035021                       | 0,5454545617               | 0,5454545617               | -0,1174563169               | -0,1174563169               | -0,1174563169               |

Caecal BA versus bact taxa

| Deferribacterac<br>eae_f   | Mucispirillum_<br>g        | Actinobacteria<br>_p       | Actinobacteria<br>_c       | Coriobacterida<br>e_s      | Coriobacteriale<br>s_o     | Coriobacterine<br>ae_s     |
|----------------------------|----------------------------|----------------------------|----------------------------|----------------------------|----------------------------|----------------------------|
| 0,172726193                | 0,172726193                | 0,3668975542               | 0,3668975542               | 0,1745616427               | 0,1745616427               | 0,1745616427               |
| 0,2122742887               | 0,2122742887               | 0,2220724614               | 0,2220724614               | 0,2220724614               | 0,2220724614               | 0,2220724614               |
| <b><u>0,0133648118</u></b> | <b><u>0,0133648118</u></b> | 0,1124311906               | 0,1124311906               | <b><u>0,0293122741</u></b> | <b><u>0,0293122741</u></b> | <b><u>0,0293122741</u></b> |
| <b><u>0,0210288743</u></b> | <b><u>0,0210288743</u></b> | <b><u>0,0316715194</u></b> | <b><u>0,0316715194</u></b> | 0,0706627549               | 0,0706627549               | 0,0706627549               |
| 0,1058185576               | 0,1058185576               | 0,0706627549               | 0,0706627549               | 0,1058185576               | 0,1058185576               | 0,1058185576               |
| <b><u>0,0303607629</u></b> | <b><u>0,0303607629</u></b> | <b><u>0,03706381</u></b>   | <b><u>0,03706381</u></b>   | <b><u>0,0210288743</u></b> | <b><u>0,0210288743</u></b> | <b><u>0,0210288743</u></b> |
| 0,0951236888               | 0,0951236888               | 0,1031823748               | 0,1031823748               | <b><u>0,0411345153</u></b> | <b><u>0,0411345153</u></b> | <b><u>0,0411345153</u></b> |
| 0,5027606059               | 0,5027606059               | 0,7731886381               | 0,7731886381               | 0,5744378859               | 0,5744378859               | 0,5744378859               |
| 0,0972870029               | 0,0972870029               | 0,0972870029               | 0,0972870029               | 0,0583507756               | 0,0583507756               | 0,0583507756               |
| 0,8479051839               | 0,8479051839               | 0,9215366205               | 0,9215366205               | 0,9509273658               | 0,9509273658               | 0,9509273658               |
| 0,9680308461               | 0,9680308461               | 0,5886545318               | 0,5886545318               | 0,9460329853               | 0,9460329853               | 0,9460329853               |
| 0,9050421726               | 0,9050421726               | 0,9869452245               | 0,9869452245               | 0,8821385363               | 0,8821385363               | 0,8821385363               |
| 0,3158750946               | 0,3158750946               | 0,3398725916               | 0,3398725916               | 0,4943537925               | 0,4943537925               | 0,4943537925               |
| 0,3146999174               | 0,3146999174               | 0,6706450214               | 0,6706450214               | 0,3714641822               | 0,3714641822               | 0,3714641822               |
| 0,1548532                  | 0,1548532                  | 0,5089964698               | 0,5089964698               | 0,3714641822               | 0,3714641822               | 0,3714641822               |
| 0,7731886381               | 0,7731886381               | 0,6587099774               | 0,6587099774               | 0,8289065518               | 0,8289065518               | 0,8289065518               |
| 0,2755888484               | 0,2755888484               | 0,5886545318               | 0,5886545318               | 0,4943537925               | 0,4943537925               | 0,4943537925               |
| 0,1272892381               | 0,1272892381               | 0,0583507756               | 0,0583507756               | 0,1058185576               | 0,1058185576               | 0,1058185576               |
| 0,5488731417               | 0,5488731417               | 0,6279604426               | 0,6279604426               | 0,2472896561               | 0,2472896561               | 0,2472896561               |
| 0,8949213855               | 0,8949213855               | 0,9050421726               | 0,9050421726               | 0,9509273658               | 0,9509273658               | 0,9509273658               |

| Deferribacterac<br>eae_f    | Mucispirillum_<br>g         | Actinobacteria<br>_p        | Actinobacteria<br>_c        | Coriobacterida<br>e_s       | Coriobacteriale<br>s_o      | Coriobacterine<br>ae_s      |
|-----------------------------|-----------------------------|-----------------------------|-----------------------------|-----------------------------|-----------------------------|-----------------------------|
| -0,6264336705               | -0,6264336705               | 0,5034965277                | 0,5034965277                | 0,622377634                 | 0,622377634                 | 0,622377634                 |
| -0,5944001675               | -0,5944001675               | 0,5874125957                | 0,5874125957                | 0,5874125957                | 0,5874125957                | 0,5874125957                |
| <b><u>0,9076169729</u></b>  | <b><u>0,9076169729</u></b>  | -0,6853147149               | -0,6853147149               | <b><u>-0,8251748085</u></b> | <b><u>-0,8251748085</u></b> | <b><u>-0,8251748085</u></b> |
| <b><u>0,870049715</u></b>   | <b><u>0,870049715</u></b>   | <b><u>-0,8173804283</u></b> | <b><u>-0,8173804283</u></b> | <b><u>-0,7501984835</u></b> | <b><u>-0,7501984835</u></b> | <b><u>-0,7501984835</u></b> |
| -0,6940600872               | -0,6940600872               | <b><u>0,7482517362</u></b>  | <b><u>0,7482517362</u></b>  | 0,6923077106                | 0,6923077106                | 0,6923077106                |
| <b><u>-0,8221942186</u></b> | <b><u>-0,8221942186</u></b> | <b><u>0,8041958213</u></b>  | <b><u>0,8041958213</u></b>  | <b><u>0,8531468511</u></b>  | <b><u>0,8531468511</u></b>  | <b><u>0,8531468511</u></b>  |
| <b><u>-0,7154157758</u></b> | <b><u>-0,7154157758</u></b> | 0,6993007064                | 0,6993007064                | <b><u>0,7972028255</u></b>  | <b><u>0,7972028255</u></b>  | <b><u>0,7972028255</u></b>  |
| 0,4093174636                | 0,4093174636                | -0,2237762213               | -0,2237762213               | -0,3566433489               | -0,3566433489               | -0,3566433489               |
| <b><u>-0,7082971931</u></b> | <b><u>-0,7082971931</u></b> | <b><u>0,7062937021</u></b>  | <b><u>0,7062937021</u></b>  | <b><u>0,769230783</u></b>   | <b><u>0,769230783</u></b>   | <b><u>0,769230783</u></b>   |
| 0,1637269855                | 0,1637269855                | 0,0909090936                | 0,0909090936                | -0,062937066                | -0,062937066                | -0,062937066                |
| 0,0284742583                | 0,0284742583                | -0,3496503532               | -0,3496503532               | -0,0699300691               | -0,0699300691               | -0,0699300691               |
| -0,1067784727               | -0,1067784727               | -0,0139860138               | -0,0139860138               | 0,1258741319                | 0,1258741319                | 0,1258741319                |
| 0,5303330421                | 0,5303330421                | -0,5174825191               | -0,5174825191               | -0,4125874043               | -0,4125874043               | -0,4125874043               |
| -0,5338923335               | -0,5338923335               | 0,2937062979                | 0,2937062979                | 0,4825174809                | 0,4825174809                | 0,4825174809                |
| -0,640670836                | -0,640670836                | 0,3986014128                | 0,3986014128                | 0,4825174809                | 0,4825174809                | 0,4825174809                |
| -0,2171162218               | -0,2171162218               | 0,3006992936                | 0,3006992936                | 0,1748251766                | 0,1748251766                | 0,1748251766                |
| -0,5552480221               | -0,5552480221               | 0,3496503532                | 0,3496503532                | 0,4125874043                | 0,4125874043                | 0,4125874043                |
| 0,672704339                 | 0,672704339                 | <b><u>-0,769230783</u></b>  | <b><u>-0,769230783</u></b>  | -0,6923077106               | -0,6923077106               | -0,6923077106               |
| -0,3737246394               | -0,3737246394               | 0,3286713362                | 0,3286713362                | 0,5734265447                | 0,5734265447                | 0,5734265447                |
| -0,1174563169               | -0,1174563169               | -0,1048951074               | -0,1048951074               | 0,062937066                 | 0,062937066                 | 0,062937066                 |

Caecal BA versus bact taxa

| Coriobacteriac<br>eae_f    | unclassified_C<br>oriobacteriacea<br>e | unclassified_Pr<br>oteobacteria | unclassified_B<br>acteria  |
|----------------------------|----------------------------------------|---------------------------------|----------------------------|
| 0,1745616427               | 0,1745616427                           | 0,0559322036                    | 0,1031823748               |
| 0,2220724614               | 0,2220724614                           | 0,0953639224                    | 0,1198747798               |
| <b><u>0,0293122741</u></b> | <b><u>0,0293122741</u></b>             | <b><u>0,0210288743</u></b>      | <b><u>0,0247018378</u></b> |
| 0,0706627549               | 0,0706627549                           | <b><u>0,0133648118</u></b>      | 0,0824727531               |
| 0,1058185576               | 0,1058185576                           | 0,0900320161                    | <b><u>0,0411345153</u></b> |
| <b><u>0,0210288743</u></b> | <b><u>0,0210288743</u></b>             | 0,0824727531                    | <b><u>0,0460795543</u></b> |
| <b><u>0,0411345153</u></b> | <b><u>0,0411345153</u></b>             | 0,1058185576                    | 0,0625487454               |
| 0,5744378859               | 0,5744378859                           | 0,564092973                     | 0,2472896561               |
| 0,0583507756               | 0,0583507756                           | <b><u>0,0332288547</u></b>      | 0,1058185576               |
| 0,9509273658               | 0,9509273658                           | 0,7065773409                    | 0,6587099774               |
| 0,9460329853               | 0,9460329853                           | 0,8010843596                    | 0,8191111001               |
| 0,8821385363               | 0,8821385363                           | 0,6177653709                    | 0,7215826685               |
| 0,4943537925               | 0,4943537925                           | 0,5263894621                    | 0,3265707493               |
| 0,3714641822               | 0,3714641822                           | 0,3714641822                    | 0,3787832653               |
| 0,3714641822               | 0,3714641822                           | 0,0900320161                    | 0,2122742887               |
| 0,8289065518               | 0,8289065518                           | 0,2358320013                    | 0,8612450621               |
| 0,4943537925               | 0,4943537925                           | 0,0804990372                    | 0,3265707493               |
| 0,1058185576               | 0,1058185576                           | 0,5089964698                    | 0,3668975542               |
| 0,2472896561               | 0,2472896561                           | 0,3714641822                    | 0,1904541381               |
| 0,9509273658               | 0,9509273658                           | 0,6543922896                    | 0,8191111001               |

| Coriobacteriac<br>eae_f     | unclassified_C<br>oriobacteriacea<br>e | unclassified_Pr<br>oteobacteria | unclassified_B<br>acteria   |
|-----------------------------|----------------------------------------|---------------------------------|-----------------------------|
| 0,622377634                 | 0,622377634                            | <b><u>-0,7762237787</u></b>     | -0,6993007064               |
| 0,5874125957                | 0,5874125957                           | <b><u>-0,7132866979</u></b>     | -0,6783216596               |
| <b><u>-0,8251748085</u></b> | <b><u>-0,8251748085</u></b>            | <b><u>0,8601398468</u></b>      | <b><u>0,8391608596</u></b>  |
| <b><u>-0,7501984835</u></b> | <b><u>-0,7501984835</u></b>            | <b><u>0,9069563746</u></b>      | <b><u>0,727804482</u></b>   |
| 0,6923077106                | 0,6923077106                           | <b><u>-0,7202796936</u></b>     | <b><u>-0,7972028255</u></b> |
| <b><u>0,8531468511</u></b>  | <b><u>0,8531468511</u></b>             | <b><u>-0,7272727489</u></b>     | <b><u>-0,7902097702</u></b> |
| <b><u>0,7972028255</u></b>  | <b><u>0,7972028255</u></b>             | -0,6923077106                   | <b><u>-0,7622377872</u></b> |
| -0,3566433489               | -0,3566433489                          | 0,3636363745                    | 0,5734265447                |
| <b><u>0,769230783</u></b>   | <b><u>0,769230783</u></b>              | <b><u>-0,811188817</u></b>      | -0,6923077106               |
| -0,062937066                | -0,062937066                           | 0,2727272809                    | 0,3006992936                |
| -0,0699300691               | -0,0699300691                          | -0,1958041936                   | -0,1818181872               |
| 0,1258741319                | 0,1258741319                           | -0,3356643319                   | -0,2657342553               |
| -0,4125874043               | -0,4125874043                          | 0,3846153915                    | 0,5244755149                |
| 0,4825174809                | 0,4825174809                           | -0,4965035021                   | -0,4755244851               |
| 0,4825174809                | 0,4825174809                           | <b><u>-0,7202796936</u></b>     | -0,5944055915               |
| 0,1748251766                | 0,1748251766                           | -0,5804196                      | -0,1538461596               |
| 0,4125874043                | 0,4125874043                           | <b><u>-0,7342657447</u></b>     | -0,5244755149               |
| -0,6923077106               | -0,6923077106                          | 0,3916083872                    | 0,5034965277                |
| 0,5734265447                | 0,5734265447                           | -0,4895104766                   | -0,608391583                |
| 0,062937066                 | 0,062937066                            | -0,3146853149                   | -0,1818181872               |
