# Supplementary material for: Targeting the gut microbiota with inulin-type fructans: preclinical demonstration of a novel approach in the management of endothelial dysfunction
Source: PubMed Central journal article supplement — Gut. 2017 Apr 4;67(2):271–83. doi: 10.1136/gutjnl-2016-313316 (PMC5868295; doi:10.1136/gutjnl-2016-313316), 2017-04-04
Supplement: gutjnl-2016-313316supp005.pdf [file gutjnl-2016-313316supp005.pdf]

Predicted Metagenome (PICRUSt)

| #Functions                                          | Predicted Metagenome (PICRUSt) |             |             |             |             |               |              |             | ANOVA              |                    |                     |                    |           |           |
|-----------------------------------------------------|--------------------------------|-------------|-------------|-------------|-------------|---------------|--------------|-------------|--------------------|--------------------|---------------------|--------------------|-----------|-----------|
|                                                     | MEAN                           | SEM         |             |             |             | one-way ANOVA | Tukey values |             |                    |                    |                     |                    |           |           |
|                                                     | KO DEF                         | KO DEF      | WT DEF      | WT DEF      | KO DEF      | KO DEF        | WT DEF       | WT DEF      | p-value            | q-value            | KO DEF              | WT DEF             | WT DEF    | WT DEF    |
|                                                     | ITF                            | ITF         | ITF         | ITF         | ITF         | ITF           | ITF          | ITF         |                    |                    | vs KO DEF           | vs KO DEF          | vs KO DEF | vs KO DEF |
| Bacterial chemotaxis                                | 147324.3333                    | 45365.7222  | 129737.4444 | 88104.5555  | 11138.3123  | 4685.871636   | 5680.498602  | 9735.87853  | <b>8.1035E-013</b> | <b>2.1798E-010</b> | <b>8.6270E-012</b>  | <b>0.002019551</b> |           |           |
| Bacterial motility proteins                         | 314579.8667                    | 117773.2778 | 287854.3889 | 211188.4444 | 23002.14651 | 10238.07114   | 12151.88814  | 17849.85806 | <b>2.1890E-012</b> | <b>2.9172E-010</b> | <b>2.5232E-011</b>  | <b>0.005053913</b> |           |           |
| Flagellar assembly                                  | 147678.3333                    | 30871.6667  | 124140.3333 | 77688.3333  | 12841.78199 | 4902.877338   | 7635.032631  | 9910.442234 | <b>3.3274E-012</b> | <b>2.9836E-010</b> | <b>2.2087E-011</b>  | <b>0.001133987</b> |           |           |
| Mineral absorption                                  | 1230.266667                    | 313.888889  | 602.833333  | 503.888889  | 133.4637624 | 62.82374011   | 87.96019042  | 63.59696672 | <b>3.2441E-011</b> | <b>2.1817E-009</b> | <b>9.3531E-010</b>  | <b>0.00013947</b>  |           |           |
| Sporulation                                         | 157994.3333                    | 40096       | 128986.4444 | 78057.5     | 10274.06891 | 10330.38418   | 8632.392685  | 17112.72083 | <b>6.2184E-009</b> | <b>3.3455E-007</b> | <b>2.1105E-008</b>  | <b>0.015374997</b> |           |           |
| beta-Lactam resistance                              | 2379.266667                    | 643.666667  | 4841.277778 | 7052.944444 | 491.8253413 | 401.4400933   | 498.0008814  | 473.7232021 | <b>6.0859E-009</b> | <b>6.6292E-007</b> | <b>6.3614E-007</b>  | <b>0.005804045</b> |           |           |
| Flavone and flavonol biosynthesis                   | 2980.8                         | 598.722222  | 2579.722222 | 1479.777778 | 328.082862  | 129.3045697   | 252.0586326  | 274.0369418 | <b>9.1917E-009</b> | <b>3.7736E-007</b> | <b>1.0159E-008</b>  | <b>0.011928793</b> |           |           |
| Porphyry and chlorophyll metabolism                 | 188094.8667                    | 104736      | 181245.9444 | 169492.2222 | 6612.707917 | 7016.530094   | 4217.788592  | 15978.89709 | <b>1.4505E-007</b> | <b>6.8515E-006</b> | <b>0.01990E-006</b> | <b>0.022347891</b> |           |           |
| Plant-pathogen interaction                          | 34829.6                        | 21777.55556 | 33552.44444 | 30649.88889 | 1263.360868 | 1399.301126   | 858.729112   | 2144.921759 | <b>0.00000134</b>  | <b>4.0041E-006</b> | <b>7.2851E-007</b>  | <b>0.015294827</b> |           |           |
| Ion channels                                        | 2194.733333                    | 6973.611111 | 5154.277778 | 4808.38889  | 340.9355821 | 602.5659302   | 563.1236343  | 880.4166317 | <b>1.6392E-007</b> | <b>4.004E-006</b>  | <b>6.3852E-005</b>  | <b>0.002369418</b> |           |           |
| Cellular antigens                                   | 7992.266667                    | 11762.83333 | 8740.166667 | 11987.38889 | 409.2216126 | 361.7311974   | 304.4962759  | 858.8497653 | <b>3.8008E-007</b> | <b>0.0393E-006</b> | <b>5.8039E-005</b>  | <b>0.000303548</b> |           |           |
| Penicillin and cephalosporin biosynthesis           | 2750.133333                    | 8045.666667 | 6541.388889 | 8947.333333 | 655.9656132 | 578.8880284   | 747.1605865  | 819.6294463 | <b>0.000004</b>    | <b>0.0393E-006</b> | <b>0.000000000</b>  | <b>0.074543299</b> |           |           |
| Betalain biosynthesis                               | 579.2                          | 129.2222222 | 550         | 213.8333333 | 113.203197  | 29.75549112   | 59.83976425  | 23.61624704 | <b>4.1840E-007</b> | <b>0.0393E-006</b> | <b>0.00002266</b>   | <b>0.001080242</b> |           |           |
| Indole alkaloid biosynthesis                        | 579.2                          | 129.2222222 | 550         | 213.8333333 | 113.203197  | 29.75549112   | 59.83976425  | 23.61624704 | <b>4.1840E-007</b> | <b>0.0393E-006</b> | <b>0.00002266</b>   | <b>0.001080242</b> |           |           |
| Phosphatidylinositol signaling system               | 15746.46667                    | 20639       | 19305.05556 | 23498.38889 | 565.4864672 | 631.5473528   | 797.8413666  | 1182.159739 | <b>6.8979E-007</b> | <b>0.218E-005</b>  | <b>0.001053746</b>  | <b>0.003800613</b> |           |           |
| Folate biosynthesis                                 | 60607.66667                    | 77366.44444 | 73079.55556 | 91556.27778 | 2316.388607 | 2162.273879   | 2864.31036   | 5135.064146 | <b>6.9334E-007</b> | <b>1.1626E-005</b> | <b>0.006750116</b>  | <b>0.001294632</b> |           |           |
| Ethylbenzene degradation                            | 10565.86667                    | 7561.388889 | 10390.33333 | 905.833333  | 273.0591575 | 404.2967277   | 214.925368   | 524.6493958 | <b>3.7457E-007</b> | <b>1.1626E-005</b> | <b>5.7288E-006</b>  | <b>0.688495549</b> |           |           |
| Various types of N-glycan biosynthesis              | 678.9333333                    | 155.0555556 | 612.2777778 | 231.4444444 | 125.92751   | 30.71622937   | 84.99326408  | 24.64588174 | <b>1.0972E-006</b> | <b>1.6397E-005</b> | <b>5.5456E-006</b>  | <b>0.002060033</b> |           |           |
| Lipopolysaccharide biosynthesis                     | 26434.06667                    | 58072.94444 | 43186.72222 | 71972.72222 | 3257.000985 | 2833.14744    | 3131.340837  | 9109.300215 | <b>1.6107E-006</b> | <b>2.2804E-005</b> | <b>0.000891599</b>  | <b>0.001630429</b> |           |           |
| Ubiquinone and other terpenoid-quinone biosynthesis | 43679                          | 79647.72222 | 67246       | 91123.27778 | 451.82575   | 465.137148    | 4613.157467  | 7963.992673 | <b>2.7474E-006</b> | <b>0.00030595</b>  | <b>0.000262164</b>  | <b>0.017984232</b> |           |           |
| Fatty acid elongation in mitochondria               | 428.5333333                    | 1945.166667 | 1788.111111 | 1986.944444 | 185.5277124 | 179.0375732   | 254.2566365  | 224.3903501 | <b>7.5141E-006</b> | <b>0.1086E-005</b> | <b>4.8707E-005</b>  | <b>0.909674202</b> |           |           |
| Systemic lupus erythematosus                        | 428.5333333                    | 1945.166667 | 1788.111111 | 1986.944444 | 185.5277124 | 179.0375732   | 254.2566365  | 224.3903501 | <b>7.5141E-006</b> | <b>0.1086E-005</b> | <b>4.8707E-005</b>  | <b>0.909674202</b> |           |           |
| Caffeine metabolism                                 | 428.5333333                    | 1945.166667 | 1788.111111 | 1986.944444 | 185.5277124 | 179.0375732   | 254.2566365  | 224.3903501 | <b>7.5141E-006</b> | <b>0.1086E-005</b> | <b>4.8707E-005</b>  | <b>0.909674202</b> |           |           |
| Circadian rhythm - plant                            | 428.5333333                    | 1945.166667 | 1788.111111 | 1986.944444 | 185.5277124 | 179.0375732   | 254.2566365  | 224.3903501 | <b>7.5141E-006</b> | <b>0.1086E-005</b> | <b>4.8707E-005</b>  | <b>0.909674202</b> |           |           |
| Steroid biosynthesis                                | 1285.933333                    | 5935.888889 | 5364.722222 | 5960.666667 | 556.634226  | 537.1509439   | 762.8824416  | 673.2088072 | <b>7.3558E-006</b> | <b>0.1086E-005</b> | <b>4.8781E-005</b>  | <b>0.909921232</b> |           |           |
| Renal cell carcinoma                                | 2061.666667                    | 3961.666667 | 3341.666667 | 4372.666667 | 198.0655175 | 297.189625    | 290.3196936  | 352.0934127 | <b>8.019E-006</b>  | <b>0.3616E-005</b> | <b>0.000232976</b>  | <b>0.006112369</b> |           |           |
| Chagas disease (American trypanosomiasis)           | 449.066667                     | 2777.777778 | 1795.222222 | 3265.5      | 184.7040481 | 311.6338224   | 255.1710122  | 598.632167  | <b>8.1892E-006</b> | <b>0.5989E-005</b> | <b>0.000439714</b>  | <b>0.021004042</b> |           |           |
| African trypanosomiasis                             | 449.066667                     | 2777.777778 | 1795.222222 | 3265.5      | 184.7040481 | 311.6338224   | 255.1710122  | 598.632167  | <b>8.1892E-006</b> | <b>0.5989E-005</b> | <b>0.000439714</b>  | <b>0.021004042</b> |           |           |
| Glycosphingolipid biosynthesis - ganglio series     | 9204.8                         | 18782.77778 | 12610.11111 | 15861.94444 | 1400.882954 | 1182.220459   | 864.1480934  | 1133.365673 | <b>0.00009058</b>  | <b>8.9586E-005</b> | <b>1.1404E-005</b>  | <b>0.171147722</b> |           |           |
| Retroid hormone biosynthesis                        | 5654.533333                    | 13026.5     | 12244.55556 | 13270.16667 | 1065.374072 | 936.0108871   | 1199.620458  | 1033.293302 | <b>1.0294E-005</b> | <b>9.0972E-005</b> | <b>6.4263E-005</b>  | <b>0.903744654</b> |           |           |
| RNA transport                                       | 29483.06667                    | 21091.38889 | 29002.27778 | 27562.66667 | 964.739898  | 1129.715208   | 769.2822723  | 1698.357786 | <b>1.0484E-005</b> | <b>9.0972E-005</b> | <b>6.4263E-005</b>  | <b>0.87246951</b>  |           |           |
| Glycosaminoglycan degradation                       | 16110.73333                    | 30910.55556 | 25643.33333 | 29364.33333 | 2349.697524 | 1697.515051   | 1951.285367  | 1981.831705 | <b>1.1694E-005</b> | <b>9.8300E-005</b> | <b>1.5922E-005</b>  | <b>0.531507599</b> |           |           |
| Germination                                         | 6076.666667                    | 1607.111111 | 5458.833333 | 3965.27778  | 408.2641263 | 531.9127029   | 325.1240211  | 961.6850707 | <b>1.3022E-005</b> | <b>0.00106145</b>  | <b>3.4784E-005</b>  | <b>0.18394417</b>  |           |           |
| Ubiquitin system                                    | 680.066667                     | 3671.888889 | 1979.666667 | 440.222222  | 244.9387769 | 348.9786301   | 254.4617028  | 868.4911812 | <b>1.5428E-005</b> | <b>0.001122605</b> | <b>0.000909646</b>  | <b>0.006423788</b> |           |           |
| Riboflavin metabolism                               | 35169.13333                    | 45353.05556 | 42239.11111 | 55808.27778 | 1328.545792 | 1406.420528   | 1832.852331  | 4417.680739 | <b>1.6385E-005</b> | <b>0.00122467</b>  | <b>0.050866595</b>  | <b>0.002663355</b> |           |           |
| Carotenoid biosynthesis                             | 564.5333333                    | 1974.185556 | 1666.6667   | 2042.777778 | 175.3219859 | 180.3856798   | 249.6663165  | 218.0458151 | <b>1.6576E-005</b> | <b>0.001122607</b> | <b>0.0011823</b>    | <b>0.918122717</b> |           |           |
| Cell motility and secretion                         | 36398.13333                    | 54134       | 54587.61111 | 63267       | 2550.816233 | 2699.181662   | 3490.475353  | 4393.003842 | <b>1.6845E-005</b> | <b>0.00122467</b>  | <b>0.003808068</b>  | <b>0.121023748</b> |           |           |
| Prenyltransferases                                  | 54097.33333                    | 63315.55556 | 63592.94444 | 71331.72222 | 1558.432083 | 1768.76553    | 2416.334958  | 2523.391023 | <b>0.00018513</b>  | <b>0.000126672</b> | <b>0.024669067</b>  | <b>0.059473183</b> |           |           |
| Toluene degradation                                 | 15071.13333                    | 27138.33333 | 20662.44444 | 33199.44444 | 1942.718779 | 1356.135209   | 1322.864263  | 3990.346648 | <b>1.8619E-005</b> | <b>0.000126672</b> | <b>0.006514372</b>  | <b>0.002561907</b> |           |           |
| Sulfur metabolism                                   | 50432.93333                    | 62328.88889 | 63818.33333 | 76106.05556 | 1822.135538 | 2158.017434   | 2957.098704  | 4851.503239 | <b>1.8386E-005</b> | <b>0.000126672</b> | <b>0.067761834</b>  | <b>0.040781862</b> |           |           |
| Drug metabolism - other enzymes                     | 65002.73333                    | 46159.72222 | 60592.5     | 61125.66667 | 1688.982549 | 2156.64202    | 1718.210293  | 4012.51308  | <b>2.0057E-005</b> | <b>0.000129438</b> | <b>0.8474E-005</b>  | <b>0.998895891</b> |           |           |
| Methane metabolism                                  | 260693.2667                    | 185304.1111 | 252713.1111 | 21519.71111 | 6575.641524 | 10535.59533   | 5683.096911  | 17164.79663 | <b>2.0210E-005</b> | <b>0.000129438</b> | <b>0.000118003</b>  | <b>0.999838747</b> |           |           |
| Transcription machinery                             | 207572.6                       | 181537.9444 | 231093.7222 | 212178.6111 | 2311.036642 | 7028.816105   | 5596.070581  | 8944.282439 | <b>2.4445E-005</b> | <b>0.000129438</b> | <b>0.045316957</b>  | <b>0.1842923</b>   |           |           |
| Atrazine degradation                                | 8224.333333                    | 10695.77778 | 14541.05556 | 14734.66667 | 623.9608402 | 866.1127587   | 926.322709   | 1324.522985 | <b>2.4793E-005</b> | <b>0.00015926</b>  | <b>0.326813637</b>  | <b>0.998999934</b> |           |           |
| Glycosyltransferases                                | 56718.53333                    | 72438       | 72770.83333 | 90406.05556 | 1922.462894 | 2785.585497   | 3111.351707  | 7188.832392 | <b>2.196E-005</b>  | <b>0.00015926</b>  | <b>0.078145441</b>  | <b>0.025758225</b> |           |           |
| Huntington's disease                                | 6571.266667                    | 8507.444444 | 8289        | 11186.11111 | 357.9371515 | 449.1958772   | 453.1420949  | 948.9328249 | <b>3.4279E-005</b> | <b>0.000198052</b> | <b>0.145263365</b>  | <b>0.006373781</b> |           |           |
| Biotin metabolism                                   | 24807.66667                    | 29399.16667 | 28116.11111 | 33628.38889 | 391.3133924 | 506.4822223   | 1090.314136  | 1570.859115 | <b>3.4804E-005</b> | <b>0.000198052</b> | <b>0.044130303</b>  | <b>0.006515789</b> |           |           |
| Lipid acid metabolism                               | 8288.666667                    | 11162.44444 | 10581.44444 | 12979.55556 | 469.3804825 | 354.8931402   | 432.5467161  | 981.3524189 | <b>4.00004936</b>  | <b>0.000235016</b> | <b>0.012124133</b>  | <b>0.033536275</b> |           |           |
| Lipopolysaccharide biosynthesis proteins            | 63077.2                        | 102028.4444 | 87329.16667 | 12451.77778 | 185.3356683 | 309.0787836   | 255.7635787  | 588.035287  | <b>4.00009033</b>  | <b>0.000235016</b> | <b>0.012124133</b>  | <b>0.033536275</b> |           |           |

Predicted Metagenome (PICRUSt)

|                                                       |             |             |             |              |             |             |             |              |             |             |              |             |
|-------------------------------------------------------|-------------|-------------|-------------|--------------|-------------|-------------|-------------|--------------|-------------|-------------|--------------|-------------|
| Purine metabolism                                     | 397004.4667 | 376635.1667 | 411669.2778 | 463535.5     | 4260.508295 | 13628.59011 | 8506.691345 | 25046.61393  | 0.00140182  | 0.003142414 | 0.806847087  | 0.08847131  |
| Limonene and pinene degradation                       | 20843.93333 | 21589.88889 | 25004.27778 | 30447.88889  | 47.191886   | 1201.356561 | 932.644231  | 3112.222227  | 0.00142166  | 0.003159403 | 0.992077056  | 0.145280284 |
| General function prediction only                      | 710288.6    | 635379.3333 | 73572.2222  | 79644.4778   | 11066.2117  | 22185.04312 | 16300.17314 | 45695.232791 | 0.00144763  | 0.003152501 | 0.721359421  | 0.417978265 |
| Tryptophan metabolism                                 | 29366.46667 | 36135.27778 | 36958.55556 | 56744.11111  | 813.202061  | 4994.03067  | 1530.771052 | 8898.916649  | 0.001497459 | 0.003274931 | 0.771114779  | 0.025452657 |
| Base excision repair                                  | 83273.46667 | 81401.88889 | 90025.11111 | 971594.83333 | 1131.750679 | 3293.62772  | 2282.571844 | 4270.25258   | 0.001536498 | 0.003333209 | 0.954542458  | 0.299511627 |
| Insulin signaling pathway                             | 16862.6     | 13601.66667 | 17991.83333 | 17032.83333  | 823.2955508 | 630.3784422 | 798.9018494 | 968.5130078  | 0.00156142  | 0.003349658 | 0.037538757  | 0.803890609 |
| Arachidonic acid metabolism                           | 3526.33333  | 6300.22222  | 5803.27778  | 8500.55556   | 317.685558  | 429.582002  | 514.5472457 | 1424.150485  | 0.001588985 | 0.003349658 | 0.110592497  | 0.100215525 |
| Naphthalene degradation                               | 31895.93333 | 27813.33333 | 32075.55556 | 35859.88889  | 857.194945  | 1175.067464 | 1048.607478 | 2367.7890505 | 0.001591333 | 0.003370918 | 0.268039299  | 0.96403095  |
| Protein kinases                                       | 72148.93333 | 55476.33333 | 74127.44444 | 84515.38889  | 2292.135907 | 2724.183106 | 1452.302035 | 8195.963543  | 0.00164545  | 0.003447058 | 0.12705033   | 0.470664472 |
| Carbon fixation in photosynthetic organisms           | 12177.73333 | 10560.8889  | 12202.0556  | 139893.1667  | 1968.066569 | 4431.787225 | 2567.015005 | 10187.21798  | 0.00165305  | 0.003447058 | 0.28537367   | 0.159868672 |
| Energy metabolism                                     | 180695.8667 | 152715.3889 | 182859.4444 | 198345.3333  | 3212.791551 | 6303.652685 | 4290.264033 | 13384.85756  | 0.001688887 | 0.003496352 | 0.095342584  | 0.522701183 |
| Glutathione metabolism                                | 30354.13333 | 39743.05556 | 36126.5     | 544778.3333  | 651.7581853 | 1893.025678 | 1190.668921 | 8061.794685  | 0.001755719 | 0.003496352 | 0.457462459  | 0.158727238 |
| Metabolism of cofactors and vitamins                  | 19340.8     | 25192.94444 | 26379.88889 | 32752.94444  | 410.172802  | 1507.913716 | 1648.941104 | 4923.31137   | 0.001702349 | 0.004031366 | 0.497524176  | 0.094384503 |
| Carbon fixation pathways in prokaryotes               | 192844.4667 | 179428.6667 | 206414.3333 | 25529.4444   | 3952.770009 | 5386.721057 | 12434.70299 | 5938.721057  | 0.00180491  | 0.004031366 | 0.658262143  | 0.486549439 |
| Transcription factors                                 | 369616.0667 | 239224      | 351385.5556 | 398744.8333  | 14108.10635 | 14996.01251 | 8502.099968 | 54503.46907  | 0.00188834  | 0.004394002 | 0.02258448   | 0.677214284 |
| Pentose phosphate pathway                             | 176374.4667 | 148730.0556 | 17730.3333  | 196790.5556  | 3815.624734 | 376.101842  | 14446.46592 | 0.002253372  | 0.004481421 | 0.137206242 | 0.137206242  | 0.677191204 |
| Vitamin B6 metabolism                                 | 37130.53333 | 33482.33333 | 37351.44444 | 44088.05556  | 827.4873031 | 1131.771008 | 861.2596309 | 3374.340641  | 0.002288632 | 0.004481421 | 0.519268667  | 0.069283415 |
| Alanine, aspartate and glutamate metabolism           | 200144.3333 | 183692.6111 | 204581.8333 | 220190.8333  | 3007.10045  | 6129.010763 | 4266.383691 | 9924.230796  | 0.002309881 | 0.004481421 | 0.325701633  | 0.330017619 |
| Thiamine metabolism                                   | 84634.6     | 81434.44444 | 92151.61111 | 102026.8333  | 1439.842167 | 3401.609255 | 2157.71906  | 5802.259362  | 0.002315698 | 0.004481421 | 0.456750235  | 0.235616611 |
| Phosphonate and phosphinate metabolism                | 13528.53333 | 10368.27778 | 14069.27778 | 14659        | 541.030453  | 375.629309  | 397.6533765 | 1452.441559  | 0.002318766 | 0.004481421 | 0.057511648  | 0.957673758 |
| Ribosome Biogenesis                                   | 252042.8667 | 227208.6111 | 256719.5556 | 288460.6111  | 4509.930726 | 9486.72687  | 6295.475885 | 17335.70005  | 0.002323238 | 0.004481421 | 0.419083733  | 0.175063948 |
| Aminobenzoate degradation                             | 29963.2     | 29305.27778 | 35899.94444 | 41219.05556  | 641.9687887 | 1153.066131 | 1164.527129 | 4340.548856  | 0.002329282 | 0.004463487 | 0.997703676  | 0.399966273 |
| Pyrimidine metabolism                                 | 337215.4    | 284135      | 329879.2778 | 348778.2222  | 5605.844068 | 13721.08978 | 6946.176609 | 17756.14307  | 0.002500068 | 0.004736044 | 0.024066822  | 0.696079017 |
| Cell cycle - Caulobacter                              | 93665.46667 | 79818.2222  | 94590.0556  | 95759.72222  | 1697.198958 | 5644.129343 | 2153.715928 | 4483.27787   | 0.002522934 | 0.004736044 | 0.027964176  | 0.96407766  |
| Glycolysis / Gluconeogenesis                          | 212835.0667 | 189720.3889 | 223172.7222 | 248995.4444  | 3572.479276 | 7060.418932 | 5180.647693 | 18689.0235   | 0.002570314 | 0.004789666 | 0.466416216  | 0.291512466 |
| DNA repair and recombination proteins                 | 519459.9333 | 477465.1667 | 527479.5    | 581397.9444  | 6640.860254 | 19745.70432 | 11675.02226 | 28036.42026  | 0.002582179 | 0.004789666 | 0.436921998  | 0.354496983 |
| Alzheimer's disease                                   | 9507.2      | 9418.72222  | 10954.16667 | 11970        | 257.8062432 | 414.2871648 | 429.7720649 | 821.0912753  | 0.002916306 | 0.005362363 | 0.999486105  | 0.532488768 |
| Propanoate metabolism                                 | 96817       | 85014.94444 | 101544.0556 | 120045.0556  | 1911.438481 | 3490.872863 | 2612.484738 | 11617.16034  | 0.002930362 | 0.005362363 | 0.801589518  | 0.182424046 |
| Friar diseases                                        | 1942.733333 | 1090.777778 | 1554.111111 | 2438.777778  | 175.4144084 | 194.1609861 | 141.2269994 | 404.3473262  | 0.002964902 | 0.00538891  | 0.112920382  | 0.07176995  |
| Styrene degradation                                   | 6127.466667 | 5430.44444  | 6158.55556  | 11221.05556  | 254.9562403 | 393.7320032 | 398.4065961 | 2141.440363  | 0.003132432 | 0.00555595  | 0.876007398  | 0.236332916 |
| Phenylalanine, tyrosine and tryptophan biosynthesis   | 154737      | 140002.2222 | 160955.8889 | 172704.1667  | 2703.104503 | 5841.794446 | 3743.321871 | 9225.94333   | 0.003218678 | 0.00578798  | 0.361113892  | 0.519046574 |
| Bacterial invasion of epithelial cells                | 0.733333333 | 471.3333333 | 0.277777778 | 438.9444444  | 0.206251503 | 158.3891955 | 0.108632485 | 158.193715   | 0.003341657 | 0.005848746 | 0.035705611  | 0.041768897 |
| Amyotrophic lateral sclerosis (ALS)                   | 4839.2      | 3701.777778 | 4350.611111 | 6400.25      | 254.571801  | 299.2758095 | 270.2672018 | 894.0855673  | 0.003372575 | 0.005848746 | 0.446575957  | 0.030866286 |
| Translation factors                                   | 98073.8     | 90381.44444 | 101638.7778 | 108271.0556  | 1175.12519  | 5005.668618 | 2228.893097 | 4576.852528  | 0.00338246  | 0.005848746 | 0.406943019  | 0.495925627 |
| ABC transporters                                      | 717807.7333 | 484344.8333 | 694845.4444 | 794406.6111  | 24734.96556 | 31962.37693 | 16077.28358 | 107756.9821  | 0.003389553 | 0.005848746 | 0.046148398  | 0.632860624 |
| Antigen processing and presentation                   | 8119.2      | 6763.111111 | 8198.88889  | 7986.38889   | 163.8262494 | 360.6340449 | 206.3211357 | 387.0358374  | 0.003391838 | 0.005848746 | 0.016452501  | 0.958019512 |
| Progesterone-mediated oocyte maturation               | 8119.2      | 6763.111111 | 8198.88889  | 7986.38889   | 163.8262494 | 360.6340449 | 206.3211357 | 387.0358374  | 0.003391838 | 0.005848746 | 0.016452501  | 0.958019512 |
| Chloroalkane and chloroalkene metabolism              | 36577.73333 | 28612.66667 | 36679.22222 | 39550.72222  | 1193.663243 | 1523.912127 | 972.2655322 | 3557.466391  | 0.003584256 | 0.006111777 | 0.061018596  | 0.769267566 |
| Nitrobenzyl biosynthesis                              | 24287       | 22981.55556 | 24938.66667 | 28603        | 396.906874  | 921.1154087 | 592.4920892 | 1764.988843  | 0.003616494 | 0.006145197 | 0.046559313  | 0.696532386 |
| Pathways in cancer                                    | 1017.86667  | 1027.16667  | 11550.77778 | 12366.72222  | 248.5425683 | 510.0998252 | 406.4233719 | 431.0358353  | 0.003662354 | 0.006196057 | 0.810440671  | 0.510772828 |
| Stilbenoid, diarylheptanoid and gingerol biosynthesis | 240.7333333 | 976.5       | 432         | 71.8888889   | 57.66045659 | 237.9983006 | 54.87817762 | 115.9325048  | 0.003824767 | 0.006430019 | 0.0064145219 | 0.497574237 |
| Peptidases                                            | 357884.8    | 317403.3333 | 360155.2778 | 397722.1111  | 5119.271563 | 14658.8816  | 6890.842905 | 23673.58386  | 0.00394996  | 0.006596922 | 0.264064958  | 0.286773023 |
| Lysosome                                              | 31770.4     | 42312.88889 | 41946.94444 | 42758.77778  | 2650.861978 | 1947.760197 | 2552.330717 | 10073.30717  | 0.004039627 | 0.006736525 | 0.012715709  | 0.944714401 |
| Signal transduction mechanisms                        | 91879.26667 | 88024       | 99812.55556 | 114354.4444  | 1336.889705 | 4073.439538 | 2749.335106 | 8972.595684  | 0.004401318 | 0.007263925 | 0.96017352   | 0.216186561 |
| Type II diabetes mellitus                             | 8512.4      | 7908        | 8582.66667  | 9474.72222   | 154.0980764 | 285.5270788 | 202.9864125 | 577.7508951  | 0.004444701 | 0.007295294 | 0.65344596   | 0.907189814 |
| Protein export                                        | 106646.6    | 99565.11111 | 108317.2222 | 119900.9444  | 1376.61014  | 3772.11337  | 2271.654424 | 5001.65782   | 0.004625298 | 0.007546037 | 0.515747582  | 0.213815652 |
| Protein processing in endoplasmic reticulum           | 14488.86667 | 13928.33333 | 17123.5     | 15253        | 639.1982176 | 517.9248545 | 764.3784277 | 589.2756604  | 0.004667762 | 0.007546037 | 0.93032143   | 0.168933922 |
| D-Glutamine and D-glutamate metabolism                | 25795       | 23660.27778 | 26617.05556 | 29225.55556  | 281.1022353 | 1162.206164 | 548.8916609 | 1602.53769   | 0.004839654 | 0.00779561  | 0.527967712  | 0.309492601 |
| Replication, recombination and repair proteins        | 158300.6    | 150506.4444 | 17948.83333 | 188889.0556  | 3688.677334 | 7360.293492 | 6005.55361  | 9672.86112   | 0.004949842 | 0.00779561  | 0.898639826  | 0.899348662 |
| Homologous recombination                              | 165898.9333 | 14820.11111 | 16717.05556 | 16774.2778   | 2750.745027 | 6306.795863 | 3807.347458 | 7853.020966  | 0.005484901 | 0.008730405 | 0.071136565  | 0.623937895 |
| Fatty acid metabolism                                 | 44217.86667 | 46649.16667 | 49079.44444 | 67508.5      | 925.5770692 | 2614.245596 | 1508.71857  | 9016.725067  | 0.00565129  | 0.008686229 | 0.98680957   | 0.045942084 |
| Other transporters                                    | 54945.06667 | 46767.5     | 54909.44444 | 64776.3333   | 1274.416588 | 1387.580716 | 1382.20016  | 4649.591854  | 0.005659372 | 0.008892755 | 0.168725115  | 0.447394204 |
| Nitrogen metabolism                                   | 125644.6    | 120658.9444 | 12910.3889  | 160504       | 1429.618703 | 3615.613076 | 2559.190514 | 15731.45909  | 0.005752017 | 0.008895975 | 0.97777515   | 0.047563729 |
| Cyanoamino acid metabolism                            | 58953.4     | 44862.55556 | 54600.83333 | 59241.38889  | 1509.647476 | 2580.991683 | 1680.470674 | 5065.819121  | 0.005762363 | 0.008895975 | 0.016160138  | 0.654551204 |
| Cysteine and methionine metabolism                    | 169780.3333 | 156193.8889 | 17509.7778  | 201790.7222  | 1766.371928 | 7004.901853 | 3712.992723 | 15498.37108  | 0.005893498 | 0.009111212 | 0.735313212  | 0.197800920 |
| Glutamatergic synapse                                 | 20433.6     | 18785.66667 | 21907.44444 | 21726.11111  | 291.9570772 | 916.551975  | 452.5204086 | 805.84418    | 0.006072398 | 0.009334143 | 0.363289043  | 0.557972912 |
| DDT degradation                                       | 51          | 115.8888889 | 26.2777778  | 108.4444444  | 29.6875977  | 17.97636227 | 5.4836688   |              |             |             |              |             |

Predicted Metagenome (PICRUST)

|                                                            |             |             |             |             |             |              |             |             |             |             |             |             |
|------------------------------------------------------------|-------------|-------------|-------------|-------------|-------------|--------------|-------------|-------------|-------------|-------------|-------------|-------------|
| Fc gamma R-mediated phagocytosis                           | 0           | 2           | 0,055555556 | 0,388888889 | 0           | 1,374368542  | 0,055555556 | 0,200308404 | 0,173182675 | 0,190926801 | 0,23948162  | 0,987312419 |
| GnRH signaling pathway                                     | 0           | 2           | 0,055555556 | 0,388888889 | 0           | 1,374368542  | 0,055555556 | 0,200308404 | 0,173182675 | 0,190926801 | 0,23948162  | 0,987312419 |
| Zeaxin biosynthesis                                        | 8951,333333 | 8611,388889 | 8997,5      | 9354,333333 | 156,8758583 | 229,5018068  | 196,4666688 | 323,5467458 | 0,184593951 | 0,202676623 | 0,766114176 | 0,709222364 |
| Restriction enzyme                                         | 27914       | 27102,33333 | 28868,72222 | 31633,72222 | 1114,6062   | 1139,542811  | 1135,843719 | 2340,600217 | 0,187565199 | 0,205101782 | 0,984107103 | 0,578786203 |
| Primary bile acid biosynthesis                             | 6622,8      | 7372        | 6839,22222  | 7297,333333 | 300,8354747 | 327,6364656  | 223,7668978 | 280,668192  | 0,211551689 | 0,23039435  | 0,278764058 | 0,654130623 |
| Secondary bile acid biosynthesis                           | 6622        | 7369,611111 | 6838,166667 | 7296,277778 | 300,8086245 | 327,6750955  | 223,9002353 | 280,5779999 | 0,212696716 | 0,230707325 | 0,280586324 | 0,654158422 |
| Cardiac muscle contraction                                 | 22,33333333 | 14,33333333 | 35,27777778 | 25,5        | 6,381272202 | 4,718895406  | 9,546174526 | 7,558594644 | 0,238913252 | 0,258103071 | 0,876929241 | 0,772676247 |
| Bacterial toxins                                           | 24692       | 23928,38889 | 28512,55556 | 28082,38889 | 342,1865406 | 1212,474788  | 664,4555254 | 1404,605762 | 0,259166476 | 0,278863128 | 0,957479588 | 0,9906492   |
| Carbohydrate digestion and absorption                      | 1745,133333 | 1692,722222 | 1304,777778 | 2531,5      | 235,6807741 | 254,22664678 | 183,8266857 | 798,3006881 | 0,280253322 | 0,300351169 | 0,995824384 | 0,226525955 |
| Pathogenic Escherichia coli infection                      | 0           | 0,555555556 | 0           | 0,555555556 | 0           | 0,381107967  | 0           | 0,381107967 | 0,283564356 | 0,302683023 | 0,529413233 | 0,488452459 |
| Sphingolipid metabolism                                    | 52508       | 53939,88889 | 58162,83333 | 57251,5     | 2693,806206 | 2566,72807   | 1818,921255 | 3128,966075 | 0,383333942 | 0,407576404 | 0,981144283 | 0,994214487 |
| Bisphenol degradation                                      | 16334,8     | 15451,33333 | 17617,77778 | 16785,11111 | 372,627916  | 780,5463061  | 402,4302607 | 1500,481846 | 0,399600086 | 0,423198516 | 0,911784905 | 0,914473812 |
| Basal transcription factors                                | 4,666666667 | 2,944444444 | 3,111111111 | 3,722222222 | 1,021980648 | 0,940977875  | 0,593477009 | 7,35671653  | 0,481641424 | 0,508084482 | 0,481139637 | 0,950232784 |
| Glycosphingolipid biosynthesis - globo series              | 26496,66667 | 26978,55556 | 28036,61111 | 28947,66667 | 1328,282865 | 1463,603325  | 821,0423438 | 1398,003287 | 0,542031968 | 0,569557029 | 0,993798475 | 0,955205326 |
| Linoleic acid metabolism                                   | 12396,46667 | 11173,72222 | 12368,33333 | 11916,38889 | 294,7850204 | 698,3247966  | 271,465979  | 1143,106746 | 0,601647449 | 0,629739937 | 0,65333815  | 0,969383955 |
| Biosynthesis of type II polyketide products                | 0           | 0,055555556 | 0           | 0,055555556 | 0           | 0,055555556  | 0           | 0,055555556 | 0,611210833 | 0,629945265 | 0,787706039 | 0,762583393 |
| Chronic myeloid leukemia                                   | 0           | 0,055555556 | 0           | 0,055555556 | 0           | 0,055555556  | 0           | 0,055555556 | 0,611210833 | 0,629945265 | 0,787706039 | 0,762583393 |
| Notch signaling pathway                                    | 0           | 0,055555556 | 0           | 0,055555556 | 0           | 0,055555556  | 0           | 0,055555556 | 0,611210833 | 0,629945265 | 0,787706039 | 0,762583393 |
| Wnt signaling pathway                                      | 0           | 0,055555556 | 0           | 0,055555556 | 0           | 0,055555556  | 0           | 0,055555556 | 0,611210833 | 0,629945265 | 0,787706039 | 0,762583393 |
| Bile secretion                                             | 0,666666667 | 0,555555556 | 0,722222222 | 0,944444444 | 0,232310684 | 0,245511634  | 0,225868774 | 0,296738504 | 0,732354969 | 0,751921705 | 0,990410878 | 0,921361976 |
| Other glycan degradation                                   | 71266,13333 | 68426,33333 | 72841,22222 | 71813,77778 | 3889,48894  | 4253,903035  | 2827,841577 | 5005,061681 | 0,880860931 | 0,886060406 | 0,963839634 | 0,997869241 |
| Cell cycle                                                 | 0,4         | 0,277777778 | 0,222222222 | 0,333333333 | 0,190237946 | 0,157711484  | 0,12924     | 0,161690417 | 0,882766502 | 0,886060406 | 0,951579006 | 0,957618539 |
| Hepatitis C                                                | 0,4         | 0,277777778 | 0,222222222 | 0,333333333 | 0,190237946 | 0,157711484  | 0,12924     | 0,161690417 | 0,882766502 | 0,886060406 | 0,951579006 | 0,957618539 |
| Measles                                                    | 0,4         | 0,277777778 | 0,222222222 | 0,333333333 | 0,190237946 | 0,157711484  | 0,12924     | 0,161690417 | 0,882766502 | 0,886060406 | 0,951579006 | 0,957618539 |
| Phagosome                                                  | 0,4         | 0,277777778 | 0,222222222 | 0,333333333 | 0,190237946 | 0,157711484  | 0,12924     | 0,161690417 | 0,882766502 | 0,886060406 | 0,951579006 | 0,957618539 |
| mTOR signaling pathway                                     | 0,4         | 0,277777778 | 0,222222222 | 0,333333333 | 0,190237946 | 0,157711484  | 0,12924     | 0,161690417 | 0,882766502 | 0,886060406 | 0,951579006 | 0,957618539 |
| mRNA surveillance pathway                                  | 0,8         | 0,555555556 | 0,5         | 0,666666667 | 0,380475892 | 0,315422968  | 0,282958229 | 0,323380833 | 0,923826159 | 0,923826159 | 0,953897103 | 0,982261462 |
| Adherens junction                                          | 0           | 0           | 0           | 0           | 0           | 0            | 0           | 0           | 0           | 0           | 0           | 0           |
| Aldosterone-regulated sodium reabsorption                  | 0           | 0           | 0           | 0           | 0           | 0            | 0           | 0           | 0           | 0           | 0           | 0           |
| Arrhythmogenic right ventricular cardiomyopathy (ARVC)     | 0           | 0           | 0           | 0           | 0           | 0            | 0           | 0           | 0           | 0           | 0           | 0           |
| Biosynthesis of 12-, 14- and 16-membered macrolides        | 0           | 0           | 0           | 0           | 0           | 0            | 0           | 0           | 0           | 0           | 0           | 0           |
| Biosynthesis of type II polyketide backbone                | 0           | 0           | 0           | 0           | 0           | 0            | 0           | 0           | 0           | 0           | 0           | 0           |
| CAM ligands                                                | 0           | 0           | 0           | 0           | 0           | 0            | 0           | 0           | 0           | 0           | 0           | 0           |
| Calcium signaling pathway                                  | 0           | 0           | 0           | 0           | 0           | 0            | 0           | 0           | 0           | 0           | 0           | 0           |
| Cell cycle - yeast                                         | 0           | 0           | 0           | 0           | 0           | 0            | 0           | 0           | 0           | 0           | 0           | 0           |
| Cholinergic synapse                                        | 0           | 0           | 0           | 0           | 0           | 0            | 0           | 0           | 0           | 0           | 0           | 0           |
| Clavulanic acid biosynthesis                               | 0           | 0           | 0           | 0           | 0           | 0            | 0           | 0           | 0           | 0           | 0           | 0           |
| Complement and coagulation cascades                        | 0           | 0           | 0           | 0           | 0           | 0            | 0           | 0           | 0           | 0           | 0           | 0           |
| Cytochrome P450                                            | 0           | 0           | 0           | 0           | 0           | 0            | 0           | 0           | 0           | 0           | 0           | 0           |
| Cytokine receptors                                         | 0           | 0           | 0           | 0           | 0           | 0            | 0           | 0           | 0           | 0           | 0           | 0           |
| Cytokine-cytokine receptor interaction                     | 0           | 0           | 0           | 0           | 0           | 0            | 0           | 0           | 0           | 0           | 0           | 0           |
| Cytosolic DNA-sensing pathway                              | 0           | 0           | 0           | 0           | 0           | 0            | 0           | 0           | 0           | 0           | 0           | 0           |
| Dilated cardiomyopathy (DCM)                               | 0           | 0           | 0           | 0           | 0           | 0            | 0           | 0           | 0           | 0           | 0           | 0           |
| ECM-receptor interaction                                   | 0           | 0           | 0           | 0           | 0           | 0            | 0           | 0           | 0           | 0           | 0           | 0           |
| Endocrine and other factor-regulated calcium reabsorption  | 0           | 0           | 0           | 0           | 0           | 0            | 0           | 0           | 0           | 0           | 0           | 0           |
| ErbB signaling pathway                                     | 0           | 0           | 0           | 0           | 0           | 0            | 0           | 0           | 0           | 0           | 0           | 0           |
| Fat digestion and absorption                               | 0           | 0           | 0           | 0           | 0           | 0            | 0           | 0           | 0           | 0           | 0           | 0           |
| Fc epsilon RI signaling pathway                            | 0           | 0           | 0           | 0           | 0           | 0            | 0           | 0           | 0           | 0           | 0           | 0           |
| Focal adhesion                                             | 0           | 0           | 0           | 0           | 0           | 0            | 0           | 0           | 0           | 0           | 0           | 0           |
| G protein-coupled receptors                                | 0           | 0           | 0           | 0           | 0           | 0            | 0           | 0           | 0           | 0           | 0           | 0           |
| GTP-binding proteins                                       | 0           | 0           | 0           | 0           | 0           | 0            | 0           | 0           | 0           | 0           | 0           | 0           |
| Gastric acid secretion                                     | 0           | 0           | 0           | 0           | 0           | 0            | 0           | 0           | 0           | 0           | 0           | 0           |
| Glioma                                                     | 0           | 0           | 0           | 0           | 0           | 0            | 0           | 0           | 0           | 0           | 0           | 0           |
| Glycan binding proteins                                    | 0           | 0           | 0           | 0           | 0           | 0            | 0           | 0           | 0           | 0           | 0           | 0           |
| Glycosaminoglycan biosynthesis - chondroitin sulfate       | 0           | 0           | 0           | 0           | 0           | 0            | 0           | 0           | 0           | 0           | 0           | 0           |
| Glycosphingolipid biosynthesis - lacto and neolacto series | 0           | 0           | 0           | 0           | 0           | 0            | 0           | 0           | 0           | 0           | 0           | 0           |
| Glycosylphosphatidylinositol(GPI)-anchor biosynthesis      | 0           | 0           | 0           | 0           | 0           | 0            | 0           | 0           | 0           | 0           | 0           | 0           |
| Hedgehog signaling pathway                                 | 0           | 0           | 0           | 0           | 0           | 0            | 0           | 0           | 0           | 0           | 0           | 0           |
| Hematopoietic cell lineage                                 | 0           | 0           | 0           | 0           | 0           | 0            | 0           | 0           | 0           | 0           | 0           | 0           |
| Hypertrophic cardiomyopathy (HCM)                          | 0           | 0           | 0           | 0           | 0           | 0            | 0           | 0           | 0           | 0           | 0           | 0           |
| Isoflavonoid biosynthesis                                  | 0           | 0           | 0           | 0           | 0           | 0            | 0           | 0           | 0           | 0           | 0           | 0           |
| Leishmaniasis                                              | 0           | 0           | 0           | 0           | 0           | 0            | 0           | 0           | 0           | 0           | 0           | 0           |
| Leukocyte transendothelial migration                       | 0           | 0           | 0           | 0           | 0           | 0            | 0           | 0           | 0           | 0           | 0           | 0           |
| Long-term depression                                       | 0           | 0           | 0           | 0           | 0           | 0            | 0           | 0           | 0           | 0           | 0           | 0           |
| Long-term potentiation                                     | 0           | 0           | 0           | 0           | 0           | 0            | 0           | 0           | 0           | 0           | 0           | 0           |
| MAPK signaling pathway                                     | 0           | 0           | 0           | 0           | 0           | 0            | 0           | 0           | 0           | 0           | 0           | 0           |
| Melanogenesis                                              | 0           | 0           | 0           | 0           | 0           | 0            | 0           | 0           | 0           | 0           | 0           | 0           |
| Neuroactive ligand-receptor interaction                    | 0           | 0           | 0           | 0           | 0           | 0            | 0           | 0           | 0           | 0           | 0           | 0           |
| Neurotrophin signaling pathway                             | 0           | 0           | 0           | 0           | 0           | 0            | 0           | 0           | 0           | 0           | 0           | 0           |
| Olfactory transduction                                     | 0           | 0           | 0           | 0           | 0           | 0            | 0           | 0           | 0           | 0           | 0           | 0           |
| Oocyte meiosis                                             | 0           | 0           | 0           | 0           | 0           | 0            | 0           | 0           | 0           | 0           | 0           | 0           |
| Other types of O-glycan biosynthesis                       | 0           | 0           | 0           | 0           | 0           | 0            | 0           | 0           | 0           | 0           | 0           | 0           |
| Pancreatic cancer                                          | 0           | 0           | 0           | 0           | 0           | 0            | 0           | 0           | 0           | 0           | 0           | 0           |
| Pancreatic secretion                                       | 0           | 0           | 0           | 0           | 0           | 0            | 0           | 0           | 0           | 0           | 0           | 0           |
| Phototransduction                                          | 0           | 0           | 0           | 0           | 0           | 0            | 0           | 0           | 0           | 0           | 0           | 0           |
| Phototransduction - fly                                    | 0           | 0           | 0           | 0           | 0           | 0            | 0           | 0           | 0           | 0           | 0           | 0           |
| Regulation of actin cytoskeleton                           | 0           | 0           | 0           | 0           | 0           | 0            | 0           | 0           | 0           | 0           | 0           | 0           |
| Rheumatoid arthritis                                       | 0           | 0           | 0           | 0           | 0           | 0            | 0           | 0           | 0           | 0           | 0           | 0           |
| Salivary secretion                                         | 0           | 0           | 0           | 0           | 0           | 0            | 0           | 0           | 0           | 0           | 0           | 0           |
| Sesquiterpenoid biosynthesis                               | 0           | 0           | 0           | 0           | 0           | 0            | 0           | 0           | 0           | 0           | 0           | 0           |
| Spliceosome                                                | 0           | 0           | 0           | 0           | 0           | 0            | 0           | 0           | 0           | 0           | 0           | 0           |
| TGF-beta signaling pathway                                 | 0           | 0           | 0           | 0           | 0           | 0            | 0           | 0           | 0           | 0           | 0           | 0           |
| Tight junction                                             | 0           | 0           | 0           | 0           | 0           | 0            | 0           | 0           | 0           | 0           | 0           | 0           |
| VEGF signaling pathway                                     | 0           | 0           | 0           | 0           | 0           | 0            | 0           | 0           | 0           | 0           | 0           | 0           |
| Vascular smooth muscle contraction                         | 0           | 0           | 0           | 0           | 0           | 0            | 0           | 0           | 0           | 0           | 0           | 0           |
| Vasopressin-regulated water reabsorption                   | 0           | 0           | 0           | 0           | 0           | 0            | 0           | 0           | 0           | 0           | 0           | 0           |
