# Supplementary material for: Targeting the gut microbiota with inulin-type fructans: preclinical demonstration of a novel approach in the management of endothelial dysfunction
Source: PubMed Central journal article supplement — Gut. 2017 Apr 4;67(2):271–83. doi: 10.1136/gutjnl-2016-313316 (PMC5868295; doi:10.1136/gutjnl-2016-313316), 2017-04-04
Supplement: gutjnl-2016-313316supp006.pdf [file gutjnl-2016-313316supp006.pdf]

**Table S4:** Plasma lipids and cardiovascular risks predictors in KO DEF and KO DEF ITF mice

| <b>Plasma lipids</b>       | <b>KO DEF</b> | <b>KO DEF ITF</b> |
|----------------------------|---------------|-------------------|
| Triglyceridemia (mM)       | 0.97±0.09     | 0.88±0.06         |
| Total cholesterolemia (mM) | 5.77±0.43     | 6.95±0.68         |
| HDL-cholesterol (mM)       | 1.08±0.09     | 1.41±0.18         |
| Cholesterol/HDLc           | 5.84±0.42     | 4.95±0.59         |
| Non-HDLc (mM)              | 4.68±0.41     | 5.38±0.66         |

*Data (N=15-18) are expressed mean ± SEM and analyzed by Unpaired Student t test.*
