# Supplementary material for: Targeting the gut microbiota with inulin-type fructans: preclinical demonstration of a novel approach in the management of endothelial dysfunction
Source: PubMed Central journal article supplement — Gut. 2017 Apr 4;67(2):271–83. doi: 10.1136/gutjnl-2016-313316 (PMC5868295; doi:10.1136/gutjnl-2016-313316), 2017-04-04
Supplement: gutjnl-2016-313316supp007.pdf [file gutjnl-2016-313316supp007.pdf]

**Table S5: Difference in body weight and total caloric intake between WT DEF and KO DEF are not blunted by the ITF supplementation.** A significant increase of the total body weight (BW) gain, calculated as the difference between BW at week 0 and at week 12, and of the BW at time of necropsy occurred in Apoe<sup>-/-</sup> mice fed n-3 PUFA-depleted diet (KO DEF), compared to the wild-type mice (WT DEF). The difference in BW between the different genetic background was associated with a significantly higher caloric intake in KO DEF mice, as compared to WT DEF mice. Fifteen days of ITF supplementation blunted the difference between genotypes in total BW gain but n-3 PUFA-depleted Apoe<sup>-/-</sup> mice supplemented in ITF (KO DEF ITF) were still significantly heavier than WT mice, supplemented or not. ITF represent a caloric intake of 1.5 kcal per gram and it did not affect the total caloric intake in WT and KO DEF ITF mice. As expected, ITF in WT and KO DEF mice induced a more than 2-fold increase in weight of caecal content and caecal tissue, an indication of caecal fermentation.

| PARAMETERS                        | WT DEF        | WT DEF ITF      | KO DEF           | KO DEF ITF       |
|-----------------------------------|---------------|-----------------|------------------|------------------|
| Total BW gain (g)                 | 3.08 ± 0.26   | 2.26 ± 0.38     | 4.45 ± 0.29*,\$  | 3.76 ± 0.35\$    |
| BW at 12 weeks (g)                | 24.99 ± 0.27  | 24.93 ± 0.39    | 27.9 ± 0.48*,\$  | 27.85 ± 0.5*,\$  |
| Total caloric intake (kcal/mouse) | 826.5 ± 23.6  | 828.1 ± 26.4    | 976.7 ± 21.6*,\$ | 931.6 ± 18.7*,\$ |
| Caecal tissue weight (g)          | 0.049 ± 0.005 | 0.163 ± 0.03*,# | 0.059 ± 0.003    | 0.169±0.02*,#    |
| Caecal content weight (g)         | 0.306 ± 0.016 | 0.725 ± 0.05*,# | 0.342 ± 0.011    | 0.846 ± 0.08*,#  |

Total body weight (BW) gain, BW at 12 weeks, total caloric intake, caecal tissue weight and caecal content weight of n-3 PUFA depleted wild-type mice (WT DEF), of n-3 PUFA depleted wild-type mice supplemented in ITF for the last fifteen days (WT DEF ITF), of n-3 PUFA depleted Apoe<sup>-/-</sup> mice (KO DEF) and of n-3 PUFA depleted Apoe<sup>-/-</sup> mice supplemented in ITF for the last fifteen days (KO DEF ITF). Data are expressed as mean ± SEM. Data were analysed by one-way ANOVA followed by Tukey's post-tests: \* vs WT DEF, \$ vs WT DEF ITF, # vs KO DEF.
